# Supplementary material for: Causal Inference for Genetically Determined Levels of High-Density Lipoprotein Cholesterol and Risk of Infectious Disease
Source: PubMed Central journal article supplement — Arterioscler Thromb Vasc Biol. 2019 Nov 7;40(1):267–78. doi: 10.1161/ATVBAHA.119.313381 (PMC6946100; doi:10.1161/atvbaha.119.313381), 2019-11-07
Supplement: atv-40-267-s002.pdf [file atv-40-267-s002.pdf]

## **SUPPLEMENTAL MATERIALS**

### **Causal inference for genetically-determined levels of high-density lipoprotein cholesterol and risk of infectious disease.**

Mark Trinder, MSc<sup>1,2</sup>, Keith R. Walley, MD<sup>1,3</sup>, John H. Boyd, MD<sup>1,2,3</sup>, Liam R. Brunham, MD, PhD<sup>1,2,3\*</sup>.

<sup>1</sup> Centre for Heart Lung Innovation, University of British Columbia, Vancouver, British Columbia, Canada

<sup>2</sup> Experimental Medicine Program, University of British Columbia, Vancouver, British Columbia, Canada

<sup>3</sup> Department of Medicine, University of British Columbia, Vancouver, British Columbia, Canada

## MAJOR RESOURCES TABLES

### Animals (in vivo studies)

| Species | Vendor or Source | Background Strain | Sex |
|---------|------------------|-------------------|-----|
| NA      | NA               | NA                | NA  |

### Animal breeding

|                 | Species | Vendor or Source | Background Strain | Other Information |
|-----------------|---------|------------------|-------------------|-------------------|
| Parent - Male   | NA      | NA               | NA                |                   |
| Parent - Female | NA      |                  | NA                | NA                |

### Antibodies

| Target antigen | Vendor or Source | Catalog # | Working concentration | Lot # (preferred but not required) |
|----------------|------------------|-----------|-----------------------|------------------------------------|
| NA             | NA               | NA        | NA                    | NA                                 |

### Cultured Cells

| Name | Vendor or Source | Sex (F, M, or unknown) |
|------|------------------|------------------------|
| NA   | NA               | NA                     |

## SUPPLEMENTAL METHODS

### *Serum Biochemistry Analyses.*

The detailed description of the serum biochemistry analyses have been described ([http://biobank.ndph.ox.ac.uk/showcase/showcase/docs/serum\\_biochemistry.pdf](http://biobank.ndph.ox.ac.uk/showcase/showcase/docs/serum_biochemistry.pdf) and [http://biobank.ndph.ox.ac.uk/showcase/showcase/docs/serum\\_hb1ac.pdf](http://biobank.ndph.ox.ac.uk/showcase/showcase/docs/serum_hb1ac.pdf)). All serum biochemistry results described were performed using the Beckman Coulter AU5800 platform (Beckman Coulter (UK), Ltd) other than hemoglobin A1c, which was performed using Bio-Rad Variant II Turbo analysers (Bio-Rad Laboratories, Inc.). The general details for each assay are displayed in Supplemental Table 1. Results for serum biochemistry are reported for samples obtained at the time of study enrolment unless otherwise stated.

## SUPPLEMENTAL TABLES

**Supplemental Table I. Serum biochemistry assay details.** HDL-C: high-density lipoprotein cholesterol; LDL-C: low-density lipoprotein cholesterol.

| <b>Serum assay</b>         | <b>Assay Manufacturer</b>  | <b>Analytical Platform</b>         | <b>Analysis Methodology</b>            | <b>Reported Units</b> | <b>Manufacturer's Analytical Range for Reported Units</b> |
|----------------------------|----------------------------|------------------------------------|----------------------------------------|-----------------------|-----------------------------------------------------------|
| Total cholesterol (mg/dL)  | Beckman Coulter (UK), Ltd  | Beckman Coulter AU5800             | Enzymatic                              | mmol/L                | 0.5 - 18                                                  |
| Direct LDL-C (mg/dL)       | Beckman Coulter (UK), Ltd  | Beckman Coulter AU5800             | Enzymatic Selective Protection         | mmol/L                | 0.26 -10.3                                                |
| Apolipoprotein B (mg/dL)   | Beckman Coulter (UK), Ltd  | Beckman Coulter AU5800             | Immuno-turbidimetric                   | g/L                   | 0.4 - 2                                                   |
| Triglycerides (mg/dL)      | Beckman Coulter (UK), Ltd  | Beckman Coulter AU5800             | Enzymatic                              | mmol/L                | 0.1 - 11.3                                                |
| HDL-C (mg/dL)              | Beckman Coulter (UK), Ltd  | Beckman Coulter AU5800             | Enzyme Immuno-inhibition               | mmol/L                | 0.05 - 4.65                                               |
| Apolipoprotein A1 (mg/dL)  | Beckman Coulter (UK), Ltd  | Beckman Coulter AU5800             | Immuno-turbidimetric                   | g/L                   | 0.4 - 2.5                                                 |
| Lipoprotein(a) (mg/dL)     | Randox Bioscience, UK      | Beckman Coulter AU5800             | Immuno-turbidimetric                   | nmol/L                | 5.76 - 189                                                |
| Hemoglobin A1c (%)         | Bio-Rad Laboratories, Inc. | Bio-Rad Variant II Turbo analysers | High Performance Liquid Chromatography | mmol/mol              | 15 - 184                                                  |
| C-reactive protein (mg/dL) | Beckman Coulter (UK), Ltd  | Beckman Coulter AU5800             | Immuno-turbidimetric                   | mg/L                  | 0.08 - 80                                                 |

**Supplemental Table II. Categorization of infectious disease-related hospitalizations by International Classification of**

**Diseases (ICD) version 10 diagnosis codes.** The number of events per an infectious subgroup reflect the time-to-first event counts for primary or secondary diagnosis codes for an infectious hospitalization episode that occurred after study enrolment. Diagnosis codes from *Chapter 1: Certain infectious and parasitic diseases* were categorized as infections of suspected bacterial, viral, or fungal infection when possible.

| <b>Infectious Disease Subgroup</b> | <b>ICD-10 Codes</b>                                                                                                                                                                                                                                                                                                                                                                                                                                            | <b>Events for Measured HDL-C (n=357,202)</b> | <b>Events for Measured LDL-C (n=389,564)</b> | <b>Events for Measured TGs (n=389,971)</b> | <b>Events for Lipid Polygenic Scores (n=407,558)</b> |
|------------------------------------|----------------------------------------------------------------------------------------------------------------------------------------------------------------------------------------------------------------------------------------------------------------------------------------------------------------------------------------------------------------------------------------------------------------------------------------------------------------|----------------------------------------------|----------------------------------------------|--------------------------------------------|------------------------------------------------------|
| Sepsis                             | <ul style="list-style-type: none"> <li>• A021 Salmonella septicemia</li> <li>• A227 Anthrax septicemia</li> <li>• A40 Streptococcal septicemia</li> <li>• A41 Other septicemia</li> <li>• B377 Candidal septicemia</li> <li>• O85 Puerperal sepsis</li> <li>• R651 Systemic Inflammatory Response Syndrome of infectious origin with organ failure</li> <li>• R527 septic shock</li> </ul>                                                                     | 2,818                                        | 3,085                                        | 3,091                                      | 3,222                                                |
| Pneumonia                          | <ul style="list-style-type: none"> <li>• B012 Varicella pneumonia</li> <li>• J14 Pneumonia due to <i>Haemophilus influenzae</i></li> <li>• J12 Viral pneumonia, not elsewhere classified</li> <li>• J16 Pneumonia due to other infectious organisms, not elsewhere classified</li> <li>• J15 Bacterial pneumonia, not elsewhere classified</li> <li>• J17 Pneumonia in diseases classified elsewhere</li> <li>• J18 Pneumonia, organism unspecified</li> </ul> | 5,971                                        | 6,497                                        | 6,511                                      | 6,808                                                |

|                         |                                                                                                                                                                                                                                                                                                                                                                                                                                                                                                                                                                                                                                                                                                                                                      |        |        |        |        |
|-------------------------|------------------------------------------------------------------------------------------------------------------------------------------------------------------------------------------------------------------------------------------------------------------------------------------------------------------------------------------------------------------------------------------------------------------------------------------------------------------------------------------------------------------------------------------------------------------------------------------------------------------------------------------------------------------------------------------------------------------------------------------------------|--------|--------|--------|--------|
|                         | <ul style="list-style-type: none"> <li>• J851 Abscess of lung with pneumonia</li> </ul>                                                                                                                                                                                                                                                                                                                                                                                                                                                                                                                                                                                                                                                              |        |        |        |        |
| Gastroenteritis         | <ul style="list-style-type: none"> <li>• A00-A09 Intestinal infectious diseases</li> </ul>                                                                                                                                                                                                                                                                                                                                                                                                                                                                                                                                                                                                                                                           | 5,851  | 6,442  | 6,451  | 6,737  |
| Skin infection          | <ul style="list-style-type: none"> <li>• L00-L08 Infections of the skin and subcutaneous tissue</li> </ul>                                                                                                                                                                                                                                                                                                                                                                                                                                                                                                                                                                                                                                           | 4,672  | 5,095  | 5,095  | 5,331  |
| Urinary tract infection | <ul style="list-style-type: none"> <li>• N390 Urinary tract infection, site not specified</li> <li>• O23 Infections of genito-urinary tract in pregnancy</li> <li>• O86 Other puerperal infections</li> </ul>                                                                                                                                                                                                                                                                                                                                                                                                                                                                                                                                        | 6,466  | 7,099  | 7,102  | 7,412  |
| Composite any infection | <ul style="list-style-type: none"> <li>• All codes from: <i>Chapter 1: Certain infectious and parasitic diseases</i></li> </ul>                                                                                                                                                                                                                                                                                                                                                                                                                                                                                                                                                                                                                      | 25,849 | 28,288 | 28,319 | 29,600 |
| Bacterial infections    | <ul style="list-style-type: none"> <li>• A00 Cholera</li> <li>• A01 Typhoid and paratyphoid fevers</li> <li>• A02 Other Salmonella infections</li> <li>• A03 Shigellosis</li> <li>• A04 Other bacterial intestinal infections</li> <li>• A05 Other bacterial foodborne intoxications</li> <li>• A15-A19 Tuberculosis</li> <li>• A20-A28 Certain zoonotic bacterial diseases</li> <li>• A30-A49 Other bacterial diseases</li> <li>• A51 Early syphilis</li> <li>• A52 Late syphilis</li> <li>• A53 Other and unspecified syphilis</li> <li>• A54 Gonococcal infection-</li> <li>• A56 Other sexually transmitted chlamydial diseases</li> <li>• A65-A69 Other spirochaetal diseases</li> <li>• A70-A74 Other diseases caused by chlamydiae</li> </ul> | 9,312  | 10,191 | 10,201 | 10,662 |

|                   |                                                                                                                                                                                                                                                                                                                                                                                                                                                                                                                                                                                                                                                                                                                                                    |       |       |       |       |
|-------------------|----------------------------------------------------------------------------------------------------------------------------------------------------------------------------------------------------------------------------------------------------------------------------------------------------------------------------------------------------------------------------------------------------------------------------------------------------------------------------------------------------------------------------------------------------------------------------------------------------------------------------------------------------------------------------------------------------------------------------------------------------|-------|-------|-------|-------|
|                   | <ul style="list-style-type: none"> <li>• A75-A79 Rickettsioses</li> <li>• B90 Sequelae of tuberculosis</li> <li>• B95 Streptococcus and staphylococcus as the cause of diseases classified to other chapters</li> <li>• B96 Other bacterial agents as the cause of diseases classified to other chapters</li> <li>• B98 Other specified infectious agents as the cause of diseases classified to other chapters</li> </ul>                                                                                                                                                                                                                                                                                                                         |       |       |       |       |
| Viral infections  | <ul style="list-style-type: none"> <li>• A08 Viral and other specified intestinal infections</li> <li>• A60 Anogenital herpes viral [herpes simplex] infections</li> <li>• A80-A89 Viral infections of the central nervous system</li> <li>• A92-A99 Arthropod-borne viral fevers and viral haemorrhagic fevers</li> <li>• B00-B09 Viral infections characterized by skin and mucous membrane lesions</li> <li>• B15-B19 Viral hepatitis</li> <li>• B20-B24 Human immunodeficiency virus [HIV] disease</li> <li>• B25-B34 Other viral diseases</li> <li>• B941 Sequelae of viral encephalitis<sup>7</sup></li> <li>• B942 Sequelae of viral hepatitis</li> <li>• B97 Viral agents as the cause of diseases classified to other chapters</li> </ul> | 2,201 | 2,460 | 2,463 | 2,563 |
| Fungal Infections | <ul style="list-style-type: none"> <li>• B35-B49 Mycoses</li> </ul>                                                                                                                                                                                                                                                                                                                                                                                                                                                                                                                                                                                                                                                                                | 1,656 | 1,816 | 1,819 | 1,912 |

**Supplemental Table III. Medications that were considered to be oral or injectable antibiotics from UK Biobank medical history taken at study enrolment.**

| <b>UK Biobank Medication Coding</b> | <b>Drug</b>                                      | <b>Antibiotic Class</b>             |
|-------------------------------------|--------------------------------------------------|-------------------------------------|
| 1140856964                          | achromycin 125mg/5ml syrup                       | Tetracycline                        |
| 1140873456                          | achromycin 250mg capsule                         | Tetracycline                        |
| 1140873462                          | achromycin 250mg i-v infusion (pdr for recon)    | Tetracycline                        |
| 1140873458                          | achromycin 250mg tablet                          | Tetracycline                        |
| 1140856898                          | achromycin 25g powder                            | Tetracycline                        |
| 1140873464                          | achromycin 500mg i-v infusion (pdr for recon)    | Tetracycline                        |
| 1140873460                          | achromycin intramuscular injection               | Tetracycline                        |
| 1140856902                          | achromycin v 125mg/5ml syrup                     | Tetracycline                        |
| 1140856900                          | achromycin v 250mg capsule                       | Tetracycline                        |
| 1141200470                          | acnecin 2000/35 tablet - clindamycin             | Lincosamide                         |
| 1140873730                          | acrosoxacin/rosoxacin                            | fluoroquinolone                     |
| 1140857162                          | aerosporin 500,000units injection - polymyxin B  | Irrigation/Miscellaneous            |
| 1140864368                          | aknemin 100mg capsule - minocycline              | Tetracycline                        |
| 1140864366                          | aknemin 50mg capsule                             | Tetracycline                        |
| 1140916292                          | almodan 125mg/5ml sugar free syrup - amoxicillin | Penicillin/Beta-lactam              |
| 1140872724                          | almodan 125mg/5ml syrup - amoxicillin            | Penicillin/Beta-lactam              |
| 1140872820                          | almodan 250mg capsule - amoxicillin              | Penicillin/Beta-lactam              |
| 1140856812                          | almodan 250mg injection - amoxicillin            | Penicillin/Beta-lactam              |
| 1140916294                          | almodan 250mg/5ml sugar free syrup - amoxicillin | Penicillin/Beta-lactam              |
| 1140872728                          | almodan 250mg/5ml syrup - amoxicillin            | Penicillin/Beta-lactam              |
| 1140872824                          | almodan 500mg capsule - amoxicillin              | Penicillin/Beta-lactam              |
| 1140856814                          | almodan 500mg injection - amoxicillin            | Penicillin/Beta-lactam              |
| 1140872952                          | ambaxin 400mg tablet - Bacampicillin             | Penicillin/Beta-lactam              |
| 1140872762                          | amfipen 125mg/5ml syrup - ampicillin             | Penicillin/Beta-lactam              |
| 1140872758                          | amfipen 250mg capsule                            | Penicillin/Beta-lactam              |
| 1140856820                          | amfipen 250mg injection                          | Penicillin/Beta-lactam              |
| 1140872764                          | amfipen 250mg/5ml syrup                          | Penicillin/Beta-lactam              |
| 1140872760                          | amfipen 500mg capsule                            | Penicillin/Beta-lactam              |
| 1140856822                          | amfipen 500mg injection                          | Penicillin/Beta-lactam              |
| 1141171562                          | amiclav 250mg/125mg tablet                       | Penicillin/Beta-lactam              |
| 1141166600                          | amidox 100mg tablet                              | Penicillin/Beta-lactam/Tetracycline |
| 1140873588                          | amikacin                                         | Aminoglycoside                      |
| 1140873592                          | amikin 100mg/2ml paediatric injection            | Aminoglycoside                      |
| 1140873590                          | amikin 500mg/2ml injection                       | Aminoglycoside                      |
| 1140910600                          | aminosalicylic acid                              | Antitubercular                      |
| 1140872716                          | amix 125 s/f suspension                          | Penicillin/Beta-lactam              |
| 1140872960                          | amix 250 capsule                                 | Penicillin/Beta-lactam              |
| 1140872720                          | amix 250 s/f suspension                          | Penicillin/Beta-lactam              |



|            |                                               |                        |
|------------|-----------------------------------------------|------------------------|
| 1140872962 | amix 500 capsule                              | Penicillin/Beta-lactam |
| 1140872800 | amopen 125mg/5ml suspension                   | Penicillin/Beta-lactam |
| 1140872792 | amopen 250mg capsule                          | Penicillin/Beta-lactam |
| 1140872804 | amopen 250mg/5ml suspension                   | Penicillin/Beta-lactam |
| 1140872796 | amopen 500mg capsule                          | Penicillin/Beta-lactam |
| 1140872900 | amoram 125mg/5ml s/f suspension - amoxicillin | Penicillin/Beta-lactam |
| 1140872896 | amoram 250mg capsule - amoxicillin            | Penicillin/Beta-lactam |
| 1140872902 | amoram 250mg/5ml s/f suspension - amoxicillin | Penicillin/Beta-lactam |
| 1140872898 | amoram 500mg capsule - amoxicillin            | Penicillin/Beta-lactam |
| 1141180226 | amoxicillin                                   | Penicillin/Beta-lactam |
| 1141180228 | amoxicillin product                           | Penicillin/Beta-lactam |
| 1141195072 | amoxident 250mg capsule                       | Penicillin/Beta-lactam |
| 1141195074 | amoxident 500mg capsule                       | Penicillin/Beta-lactam |
| 1140856804 | amoxidin 250mg capsule                        | Penicillin/Beta-lactam |
| 1140856806 | amoxidin 500mg capsule                        | Penicillin/Beta-lactam |
| 1140872722 | amoxil 125mg/1.25ml paediatric suspension     | Penicillin/Beta-lactam |
| 1140856808 | amoxil 125mg/5ml syrup                        | Penicillin/Beta-lactam |
| 1140872794 | amoxil 1g injection (pdr for recon)           | Penicillin/Beta-lactam |
| 1140872708 | amoxil 250mg capsule                          | Penicillin/Beta-lactam |
| 1140872786 | amoxil 250mg injection (pdr for recon)        | Penicillin/Beta-lactam |
| 1140872782 | amoxil 3g/sachet s/f powder                   | Penicillin/Beta-lactam |
| 1140872710 | amoxil 500mg capsule                          | Penicillin/Beta-lactam |
| 1140872790 | amoxil 500mg injection (pdr for recon)        | Penicillin/Beta-lactam |
| 1140872712 | amoxil 500mg s/f dispersible tablet           | Penicillin/Beta-lactam |
| 1140872778 | amoxil 750mg/sachet s/f powder                | Penicillin/Beta-lactam |
| 1140872814 | amoxil fiztab 125mg s/f chewable tablet       | Penicillin/Beta-lactam |
| 1140872818 | amoxil fiztab 250mg s/f chewable tablet       | Penicillin/Beta-lactam |
| 1140872822 | amoxil fiztab 500mg s/f chewable tablet       | Penicillin/Beta-lactam |
| 1140872714 | amoxil sf 125mg/5ml s/f suspension            | Penicillin/Beta-lactam |
| 1140872718 | amoxil sf 250mg/5ml s/f suspension            | Penicillin/Beta-lactam |
| 1140872646 | amoxycillin                                   | Penicillin/Beta-lactam |
| 1141157344 | amoxycillin product                           | Penicillin/Beta-lactam |
| 1140872732 | amoxymed 125mg/5ml syrup                      | Penicillin/Beta-lactam |
| 1140872730 | amoxymed 250mg capsule                        | Penicillin/Beta-lactam |
| 1140872748 | ampicillin                                    | Penicillin/Beta-lactam |
| 1140882420 | ampicillin+cloxacillin                        | Penicillin/Beta-lactam |
| 1140872936 | ampiclox 250mg/5ml syrup                      | Penicillin/Beta-lactam |
| 1140872934 | ampiclox 500mg capsule                        | Penicillin/Beta-lactam |
| 1140872910 | ampiclox injection (pdr for recon)            | Penicillin/Beta-lactam |
| 1140872914 | ampiclox neonatal injection (pdr for recon)   | Penicillin/Beta-lactam |
| 1140872912 | ampiclox neonatal s/f suspension              | Penicillin/Beta-lactam |
| 1140856724 | ampilar 125mg/5ml syrup                       | Penicillin/Beta-lactam |
| 1140856824 | ampilar 250mg capsule                         | Penicillin/Beta-lactam |
| 1140856726 | ampilar 250mg/5ml syrup                       | Penicillin/Beta-lactam |
| 1140856826 | ampilar 500mg capsule                         | Penicillin/Beta-lactam |

|            |                                                                      |                                         |
|------------|----------------------------------------------------------------------|-----------------------------------------|
| 1141152070 | ampitrin 125mg/5ml oral suspension                                   | Penicillin/Beta-lactam                  |
| 1141152062 | ampitrin 250mg capsule                                               | Penicillin/Beta-lactam                  |
| 1141152128 | ampitrin 250mg/5ml oral suspension                                   | Penicillin/Beta-lactam                  |
| 1141152068 | ampitrin 500mg capsule                                               | Penicillin/Beta-lactam                  |
| 1140857006 | arpimycin 125mg/5ml s/f suspension - erythromycin                    | Macrolide                               |
| 1140928848 | arpimycin 125mg/5ml suspension                                       | Macrolide                               |
| 1140857008 | arpimycin 250mg/5ml s/f suspension                                   | Macrolide                               |
| 1140928850 | arpimycin 250mg/5ml suspension                                       | Macrolide                               |
| 1140857010 | arpimycin 500mg/5ml s/f suspension                                   | Macrolide                               |
| 1140928852 | arpimycin 500mg/5ml suspension                                       | Macrolide                               |
| 1140872816 | augmentin 1.2g injection (pdr for recon) - Amoxi-clav                | Penicillin/Beta-lactam                  |
| 1140872808 | augmentin 125mg/31mg/5ml s/f suspension                              | Penicillin/Beta-lactam                  |
| 1140872826 | augmentin 250mg/62mg/5ml s/f suspension                              | Penicillin/Beta-lactam                  |
| 1140872802 | augmentin 375mg s/f dispersible tablet                               | Penicillin/Beta-lactam                  |
| 1140872798 | augmentin 375mg tablet                                               | Penicillin/Beta-lactam                  |
| 1140872812 | augmentin 600mg injection (pdr for recon)                            | Penicillin/Beta-lactam                  |
| 1140872734 | augmentin 625mg tablet                                               | Penicillin/Beta-lactam                  |
| 1140923614 | augmentin duo 400mg/57mg/5ml s/f suspension                          | Penicillin/Beta-lactam                  |
| 1140856966 | aureomycin 250mg capsule                                             | Tetracycline                            |
| 1140882340 | aureomycin powder                                                    | Tetracycline                            |
| 1141187104 | avelox 400mg tablet - Moxifloxacin                                   | Fluoroquinolone                         |
| 1140873284 | azactam 1g injection (pdr for recon)                                 | Monobactam                              |
| 1140856890 | azactam 2g infusion                                                  | Monobactam                              |
| 1140873286 | azactam 2g injection (pdr for recon)                                 | Monobactam                              |
| 1140873282 | azactam 500mg injection (pdr for recon)                              | Monobactam                              |
| 1140873642 | azithromycin                                                         | Macrolide                               |
| 1140873066 | azlocillin                                                           | Penicillin/Beta-lactam                  |
| 1140873280 | aztreonam                                                            | Monobactam                              |
| 1140884114 | bacampicillin                                                        | Penicillin/Beta-lactam                  |
| 1141183258 | bactiolor mr 375mg m/r tablet - Cefaclor                             | Cephalosporin                           |
| 1140873856 | bactrim 480mg dispersible tablet - Sulfamethoxazole and Trimethoprim | Other/Sulfamethoxazole and Trimethoprim |
| 1140873798 | bactrim 480mg tablet                                                 | Other/Sulfamethoxazole and Trimethoprim |
| 1140857184 | bactrim 480mg/5ml intravenous infusion                               | Other/Sulfamethoxazole and Trimethoprim |
| 1140873858 | bactrim 960mg tablet                                                 | Other/Sulfamethoxazole and Trimethoprim |
| 1140857182 | bactrim 960mg/3ml intramuscular injection                            | Other/Sulfamethoxazole and Trimethoprim |
| 1140873860 | bactrim adult suspension                                             | Other/Sulfamethoxazole and Trimethoprim |
| 1140857180 | bactrim paediatric 120mg tablet                                      | Other/Sulfamethoxazole and Trimethoprim |
| 1140873862 | bactrim paediatric s/f syrup                                         | Other/Sulfamethoxazole and Trimethoprim |
| 1140873102 | baxan 125mg/5ml suspension                                           | Cephalosporin                           |

|            |                                                           |                        |
|------------|-----------------------------------------------------------|------------------------|
| 1140873104 | baxan 250mg/5ml suspension                                | Cephalosporin          |
| 1140873100 | baxan 500mg capsule                                       | Cephalosporin          |
| 1140873106 | baxan 500mg/5ml suspension                                | Cephalosporin          |
| 1140856832 | baypen 1g injection - mezlocillin                         | Penicillin/Beta-lactam |
| 1140856834 | baypen 2g injection - mezlocillin                         | Penicillin/Beta-lactam |
| 1140856774 | baypen 500mg injection - mezlocillin                      | Penicillin/Beta-lactam |
| 1140856836 | baypen 5g infusion - mezlocillin                          | Penicillin/Beta-lactam |
| 1140856838 | baypen 5g injection - mezlocillin                         | Penicillin/Beta-lactam |
| 1140856602 | benethamine penicillin                                    | Penicillin/Beta-lactam |
| 1140856606 | benzathine penicillin                                     | Penicillin/Beta-lactam |
| 1140880282 | benzoic acid product                                      | Miscellaneous          |
| 1140872584 | benzylpenicillin                                          | Penicillin/Beta-lactam |
| 1140873554 | berkmycen 250mg tablet - oxytetracycline dihydrate        | Tetracycline           |
| 1140882416 | bicillin injection (pdr for recon)                        | Penicillin/Beta-lactam |
| 1140910360 | biomycin                                                  | Tetracycline           |
| 1140852986 | bravit tablet - levofloxacin                              | Quinolone              |
| 1140856728 | britcin 250mg capsule - ampicillin                        | Penicillin/Beta-lactam |
| 1140856730 | britcin 500mg capsule - ampicillin                        | Penicillin/Beta-lactam |
| 1140873904 | capastat 1g injection (pdr for recon)                     | Antitubercular         |
| 1140873902 | capreomycin                                               | Antitubercular         |
| 1140872982 | carbenicillin                                             | Penicillin/Beta-lactam |
| 1140884170 | carfecillin                                               | Penicillin/Beta-lactam |
| 1141181956 | caspofungin                                               | Echinocandin           |
| 1141181960 | caspofungin msd 50mg infusion concentrate (pdr for recon) | Echinocandin           |
| 1141182500 | caspofungin msd 70mg infusion concentrate (pdr for recon) | Echinocandin           |
| 1140909690 | cedax 180mg/5ml oral suspension - ceftibuten              | Cephalosporin          |
| 1140909682 | cedax 400mg capsule                                       | Cephalosporin          |
| 1140909688 | cedax 90mg/5ml oral suspension                            | Cephalosporin          |
| 1140873020 | cefaclor                                                  | Cephalosporin          |
| 1141157348 | cefaclor product                                          | Cephalosporin          |
| 1140873098 | cefadroxil                                                | Cephalosporin          |
| 1141180392 | cefalexin                                                 | Cephalosporin          |
| 1140909718 | cefamandole                                               | Cephalosporin          |
| 1141180450 | cefazolin                                                 | Cephalosporin          |
| 1140873416 | cefixime                                                  | Cephalosporin          |
| 1140873128 | cefizox 1g injection (pdr for recon)                      | Cephalosporin          |
| 1140873130 | cefizox 2g injection (pdr for recon)                      | Cephalosporin          |
| 1140873126 | cefizox 500mg injection (pdr for recon)                   | Cephalosporin          |
| 1140873424 | cefodizime                                                | Cephalosporin          |
| 1140873168 | cefotaxime                                                | Cephalosporin          |
| 1141157350 | cefotaxime product                                        | Cephalosporin          |
| 1140873182 | cefoxitin                                                 | Cephamycin             |
| 1140921786 | cefpirome                                                 | Cephalosporin          |

|            |                                               |                                         |
|------------|-----------------------------------------------|-----------------------------------------|
| 1140873430 | cefpodoxime                                   | Cephalosporin                           |
| 1141168270 | cefprozil                                     | Cephalosporin                           |
| 1141180644 | cefradine                                     | Cephalosporin                           |
| 1141180368 | cefradine product                             | Cephalosporin                           |
| 1140921790 | cefrom 1g injection (pdr for recon)           | Cephalosporin                           |
| 1140921792 | cefrom 2g injection (pdr for recon)           | Cephalosporin                           |
| 1140884098 | cefsulodin                                    | Cephalosporin                           |
| 1140873202 | ceftazidime                                   | Cephalosporin                           |
| 1140909504 | ceftibuten                                    | Cephalosporin                           |
| 1140873124 | ceftizoxime                                   | Cephalosporin                           |
| 1140873434 | ceftriaxone                                   | Cephalosporin                           |
| 1140873138 | cefuroxime                                    | Cephalosporin                           |
| 1140882336 | cefuroxime+metronidazole                      | Cephalosporin                           |
| 1141168330 | cefzil 250mg tablet                           | Cephalosporin                           |
| 1141168334 | cefzil 250mg/5ml oral suspension              | Cephalosporin                           |
| 1141168332 | cefzil 500mg tablet                           | Cephalosporin                           |
| 1140856796 | celbenin 1g injection                         | Penicillin/Beta-lactam                  |
| 1140873288 | cephalexin                                    | cephalosporin                           |
| 1140856862 | cephalothin                                   | cephalosporin                           |
| 1140873242 | cephamandole                                  | cephalosporin                           |
| 1140884102 | cephamycin                                    | cephalosporin                           |
| 1140873248 | cephazolin                                    | cephalosporin                           |
| 1140873258 | cephradine                                    | cephalosporin                           |
| 1141157352 | cephradine product                            | cephalosporin                           |
| 1140873314 | ceporex 125mg/5ml suspension                  | Cephalosporin                           |
| 1140873318 | ceporex 125mg/5ml syrup                       | Cephalosporin                           |
| 1140873336 | ceporex 1g tablet                             | Cephalosporin                           |
| 1140873304 | ceporex 250mg capsule                         | Cephalosporin                           |
| 1140873308 | ceporex 250mg tablet                          | Cephalosporin                           |
| 1140873316 | ceporex 250mg/5ml suspension                  | Cephalosporin                           |
| 1140873320 | ceporex 250mg/5ml syrup                       | Cephalosporin                           |
| 1140873306 | ceporex 500mg capsule                         | Cephalosporin                           |
| 1140873310 | ceporex 500mg tablet                          | Cephalosporin                           |
| 1140873322 | ceporex 500mg/5ml syrup                       | Cephalosporin                           |
| 1140857052 | chemocycline 125mg/5ml syrup                  | Tetracycline                            |
| 1140857050 | chemocycline 250mg tablet                     | Tetracycline                            |
| 1140873864 | chemotrim paediatric suspension               | Other/Sulfamethoxazole and Trimethoprim |
| 1140884068 | chloramphenicol powder                        | Miscellaneous                           |
| 1140857160 | chloramphenicol powder 5g                     | Miscellaneous                           |
| 1140873744 | chloromycetin 1.2g injection (pdr for recon)  | Miscellaneous                           |
| 1140873740 | chloromycetin 125mg/5ml suspension            | Miscellaneous                           |
| 1140873738 | chloromycetin 250mg capsule                   | Miscellaneous                           |
| 1140873742 | chloromycetin 300mg injection (pdr for recon) | Miscellaneous                           |
| 1140875668 | chloromycetin hydrocortisone eye ointment     | Miscellaneous                           |

|            |                                                                       |                        |
|------------|-----------------------------------------------------------------------|------------------------|
| 1140884072 | chloromycetin powder                                                  | Miscellaneous          |
| 1140857106 | chloromycetin powder 5g                                               | Miscellaneous          |
| 1140884198 | chlortetracycline                                                     | Tetracycline           |
| 1140857060 | chymocyclar capsule                                                   | Tetracycline           |
| 1140856754 | ciclacillin                                                           | Aminopenicillin        |
| 1140856980 | cidomycin 160mg/2ml injection                                         | Aminoglycoside         |
| 1140873582 | cidomycin 20mg/2ml paediatric injection                               | Aminoglycoside         |
| 1140882352 | cidomycin 80mg/2ml injection ampoule                                  | Aminoglycoside         |
| 1140882354 | cidomycin 80mg/2ml injection vial                                     | Aminoglycoside         |
| 1141195580 | cidomycin adult injectable 80mg/2ml injection ampoule                 | Aminoglycoside         |
| 1141195582 | cidomycin adult injectable 80mg/2ml injection vial                    | Aminoglycoside         |
| 1140874210 | cinobac 500mg capsule                                                 | Quinolone              |
| 1140874208 | cinoxacin                                                             | Quinolone              |
| 1140874138 | ciprofloxacin                                                         | Fluoroquinolone        |
| 1141157366 | ciprofloxacin product                                                 | Fluoroquinolone        |
| 1141151346 | ciproxin 100mg tablet                                                 | Fluoroquinolone        |
| 1140874142 | ciproxin 100mg/50ml intravenous infusion                              | Fluoroquinolone        |
| 1140874144 | ciproxin 200mg/100ml intravenous infusion                             | Fluoroquinolone        |
| 1140874140 | ciproxin 250mg tablet                                                 | Fluoroquinolone        |
| 1140910894 | ciproxin 400mg/200ml intravenous infusion                             | Fluoroquinolone        |
| 1140874146 | ciproxin 500mg tablet                                                 | Fluoroquinolone        |
| 1141157438 | ciproxin 5g/100ml oral suspension                                     | Fluoroquinolone        |
| 1140874148 | ciproxin 750mg tablet                                                 | Fluoroquinolone        |
| 1141166930 | claforan 1g infusion (pdr for recon) vial with connector - cefotaxime | Cephalosporin          |
| 1140873172 | claforan 1g injection (pdr for recon)                                 | Cephalosporin          |
| 1141166932 | claforan 2g infusion (pdr for recon) vial with connector              | Cephalosporin          |
| 1140873174 | claforan 2g injection (pdr for recon)                                 | Cephalosporin          |
| 1140873170 | claforan 500mg injection (pdr for recon)                              | Cephalosporin          |
| 1141184174 | clarithrom tab+lansopraz cap+metronidaz tab 500/30/400mg pck          | Macrolide              |
| 1141180462 | clarithromy tab+lansoprazole cap+amoxi cap 500/30/500mg pack          | Macrolide              |
| 1141168822 | clarithromy tab+lansoprazole cap+amoxy cap 500/30/500mg pack          | Macrolide              |
| 1140873634 | clarithromycin                                                        | Macrolide              |
| 1140873650 | clindamycin                                                           | Lincosamide            |
| 1141157358 | clindamycin product                                                   | Lincosamide            |
| 1140851786 | clinium 120mg tablet - clindamycin                                    | Lincosamide            |
| 1140874006 | clofazimine                                                           | Miscellaneous          |
| 1141157362 | clofazimine product                                                   | Miscellaneous          |
| 1140856974 | clomocycline sodium                                                   | Tetracycline           |
| 1140872674 | cloxacillin                                                           | Penicillin/Beta-lactam |
| 1140882374 | co-amoxiclav                                                          | Penicillin/Beta-lactam |
| 1140882422 | co-fluampicil                                                         | Penicillin/Beta-lactam |

|            |                                                              |                                         |
|------------|--------------------------------------------------------------|-----------------------------------------|
| 1141181008 | colistimethate na 1million units inj (pdr for recon)         | Miscellaneous                           |
| 1141193810 | colistimethate sodium 2million units inj (pdr for recon)     | Miscellaneous                           |
| 1141181004 | colistimethate sodium 500,000units injection (pdr for recon) | Miscellaneous                           |
| 1140873810 | colistin                                                     | Miscellaneous                           |
| 1140873820 | colistin sulphate 1.5million units tablet                    | Miscellaneous                           |
| 1140873822 | colistin sulphate 250,000units/5ml syrup                     | Miscellaneous                           |
| 1140873826 | colistin sulphomethate na 1million units inj (pdr for recon) | Miscellaneous                           |
| 1140873824 | colistin sulphomethate sodium 500,000u injection powder      | Miscellaneous                           |
| 1140873812 | colomycin 1.5million units tablet                            | Miscellaneous                           |
| 1140873818 | colomycin 1million units injection (pdr for recon)           | Miscellaneous                           |
| 1140873814 | colomycin 250,000units/5ml syrup                             | Miscellaneous                           |
| 1141193808 | colomycin 2million units injection (pdr for recon)           | Miscellaneous                           |
| 1140873816 | colomycin 500,000units injection (pdr for recon)             | Miscellaneous                           |
| 1140873944 | comixco 160/800 tablet                                       | Other/Sulfamethoxazole and Trimethoprim |
| 1140873948 | comixco 80/400 dispersible tablet                            | Other/Sulfamethoxazole and Trimethoprim |
| 1140873942 | comixco 80/400 tablet                                        | Other/Sulfamethoxazole and Trimethoprim |
| 1140873946 | comixco paediatric suspension                                | Other/Sulfamethoxazole and Trimethoprim |
| 1140857192 | comox 240mg/5ml paediatric suspension                        | Other/Sulfamethoxazole and Trimethoprim |
| 1140857188 | comox 480mg dispersible tablet                               | Other/Sulfamethoxazole and Trimethoprim |
| 1140857186 | comox 480mg tablet                                           | Other/Sulfamethoxazole and Trimethoprim |
| 1140857190 | comox forte 960mg tablet                                     | Other/Sulfamethoxazole and Trimethoprim |
| 1140873384 | compound tetracycline 300mg tablet                           | Tetracycline                            |
| 1140857330 | comprecin 200mg tablet                                       | Fluoroquinolone                         |
| 1140873780 | co-trimoxazole                                               | Other/Sulfamethoxazole and Trimethoprim |
| 1141163860 | crystapen 1200mg injection (pdr for recon)                   | Penicillin/Beta-lactam                  |
| 1140856696 | crystapen 12mg intrathecal injection                         | Penicillin/Beta-lactam                  |
| 1140909416 | crystapen 1megaunit injection (pdr for recon)                | Penicillin/Beta-lactam                  |
| 1140888720 | crystapen 250mg/5ml syrup                                    | Penicillin/Beta-lactam                  |
| 1140856690 | crystapen 300mg injection                                    | Penicillin/Beta-lactam                  |
| 1140856692 | crystapen 3g injection                                       | Penicillin/Beta-lactam                  |
| 1140872586 | crystapen 600mg injection (pdr for recon)                    | Penicillin/Beta-lactam                  |
| 1140856694 | crystapen 6g injection                                       | Penicillin/Beta-lactam                  |
| 1140888718 | crystapen v 125mg/5ml syrup                                  | Penicillin/Beta-lactam                  |
| 1140922556 | cyclodox 100mg capsule                                       | Tetracycline                            |
| 1140873908 | cycloserine                                                  | Antitubercular                          |
| 1140873654 | dalacin c 150mg capsule - clindamycin                        | Lincosamide                             |

|            |                                                                |                                      |
|------------|----------------------------------------------------------------|--------------------------------------|
| 1140873658 | dalacin c 300mg/2ml injection                                  | Lincosamide                          |
| 1140873660 | dalacin c 600mg/4ml injection                                  | Lincosamide                          |
| 1140873652 | dalacin c 75mg capsule                                         | Lincosamide                          |
| 1140873656 | dalacin c 75mg/5ml paediatric suspension                       | Lincosamide                          |
| 1140874104 | dapsone                                                        | Miscellaneous                        |
| 1140884206 | demeclocycline                                                 | Tetracycline                         |
| 1140873408 | demix 100 capsule                                              | Tetracycline                         |
| 1140873412 | demix 50 capsule                                               | Tetracycline                         |
| 1140856722 | depocillin 3g injection                                        | Penicillin/Beta-lactam               |
| 1140873466 | deteclo tablet                                                 | Tetracycline                         |
| 1140856742 | dicapen 1.5g injection - ampicillin & sulbactam                | Penicillin/Beta-lactamase inhibitors |
| 1140856744 | dicapen 3g injection                                           | Penicillin/Beta-lactamase inhibitors |
| 1140856740 | dicapen 750mg injection                                        | Penicillin/Beta-lactamase inhibitors |
| 1140873024 | distaclor 125mg/5ml suspension                                 | Cephalosporin                        |
| 1140873022 | distaclor 250mg capsule                                        | Cephalosporin                        |
| 1140873026 | distaclor 250mg/5ml suspension                                 | Cephalosporin                        |
| 1140873090 | distaclor 500mg capsule                                        | Cephalosporin                        |
| 1140873094 | distaclor mr 375mg m/r tablet                                  | Cephalosporin                        |
| 1140864180 | distaclor mr 500mg m/r tablet                                  | Cephalosporin                        |
| 1140857036 | doxatet 100mg tablet - doxytet?                                | Tetracycline                         |
| 1140873394 | doxycycline                                                    | Tetracycline                         |
| 1140873396 | doxylar 100mg capsule                                          | Tetracycline                         |
| 1141170186 | doxylar 50mg capsule                                           | Tetracycline                         |
| 1140856646 | econocil vk 125mg tablet                                       | Penicillin/Beta-lactam               |
| 1140856644 | econocil vk 250mg capsule                                      | Penicillin/Beta-lactam               |
| 1140856704 | econocil vk 250mg tablet                                       | Penicillin/Beta-lactam               |
| 1140873364 | economycin 250mg capsule                                       | Tetracycline                         |
| 1140873366 | economycin 250mg tablet                                        | Tetracycline                         |
| 1140857232 | elyzol 500mg/100ml intravenous infusion - flagyl/metronidazole | Amebicide, nitroimidazole            |
| 1140857326 | enoxacin                                                       | Fluoroquinolone                      |
| 1140874512 | entamizole tablet - Diloxanide and Metronidazole               | Penicillin/Beta-lactam               |
| 1140857202 | enteromide 500mg tablet                                        | Miscellaneous                        |
| 1141186826 | ertapenem                                                      | Carbapenem                           |
| 1140873618 | erycen 250mg e/c tablet - restomycin                           | Macrolide                            |
| 1140873672 | erycen 500mg e/c tablet                                        | Macrolide                            |
| 1140873676 | erymax 250mg e/c granules in capsule - erythromycin            | Macrolide                            |
| 1140857024 | erymax sprinkle 125mg capsule                                  | Macrolide                            |
| 1140928674 | erymin 250mg/5ml s/f suspension - erythromycin                 | Macrolide                            |
| 1140873702 | erythrocin 1g infusion (pdr for recon)                         | Macrolide                            |
| 1140873680 | erythrocin 250mg tablet                                        | Macrolide                            |
| 1140873682 | erythrocin 500mg tablet                                        | Macrolide                            |
| 1140857012 | erythrolar 250mg tablet                                        | Macrolide                            |
| 1140857016 | erythrolar 250mg/5ml suspension                                | Macrolide                            |

|            |                                                         |                                         |
|------------|---------------------------------------------------------|-----------------------------------------|
| 1140857014 | erythrolar 500mg tablet                                 | Macrolide                               |
| 1140873694 | erythromid 250mg e/c tablet                             | Macrolide                               |
| 1140873696 | erythromid ds 500mg e/c tablet                          | Macrolide                               |
| 1140873608 | erythromycin                                            | Macrolide                               |
| 1141157356 | erythromycin product                                    | Macrolide                               |
| 1140882356 | erythroped 250mg/5ml suspension                         | Macrolide                               |
| 1140873632 | erythroped 250mg/sachet granules                        | Macrolide                               |
| 1140873630 | erythroped a 1g/sachet granules                         | Macrolide                               |
| 1140873712 | erythroped a 500mg tablet                               | Macrolide                               |
| 1140873708 | erythroped forte 500mg/5ml suspension                   | Macrolide                               |
| 1140873674 | erythroped forte 500mg/sachet granules                  | Macrolide                               |
| 1141163532 | erythroped forte sf 500mg/5ml s/f suspension            | Macrolide                               |
| 1140873700 | erythroped pi 125mg/5ml suspension                      | Macrolide                               |
| 1140873678 | erythroped pi 125mg/sachet granules                     | Macrolide                               |
| 1140882360 | erythroped pi sf 125mg/5ml suspension                   | Macrolide                               |
| 1140882358 | erythroped sf 250mg/5ml suspension                      | Macrolide                               |
| 1140882372 | ethambutol hcl+isoniazid                                | Antitubercular                          |
| 1140884298 | ethambutolol                                            | Antitubercular                          |
| 1140857310 | fasigyn 1.6g/800ml intravenous infusion                 | Amebicide/Antiprotozoal                 |
| 1140874120 | fasigyn 500mg tablet                                    | Amebicide/Antiprotozoal                 |
| 1140857308 | fasigyn 800mg/400ml intravenous infusion                | Amebicide/Antiprotozoal                 |
| 1140873870 | fectrim 120mg paediatric tablet                         | Other/Sulfamethoxazole and Trimethoprim |
| 1140873866 | fectrim 80mg/400mg tablet                               | Other/Sulfamethoxazole and Trimethoprim |
| 1140873868 | fectrim forte 160mg/800mg dispersible tablet            | Other/Sulfamethoxazole and Trimethoprim |
| 1140874036 | flagyl 100mg/20ml infusion                              | Ambeicide/Antiprotozoal                 |
| 1140874032 | flagyl 200mg tablet                                     | Ambeicide/Antiprotozoal                 |
| 1140874034 | flagyl 400mg tablet                                     | Ambeicide/Antiprotozoal                 |
| 1140874114 | flagyl 500mg/100ml infusion                             | Ambeicide/Antiprotozoal                 |
| 1140874044 | flagyl compak tablet+pessary                            | Ambeicide/Antiprotozoal                 |
| 1140874038 | flagyl s 200mg/5ml suspension                           | Ambeicide/Antiprotozoal                 |
| 1140872806 | flemoxin solutab 375mg s/f dispersible tablet           | Penicillin/Beta-lactam                  |
| 1140872810 | flemoxin solutab 750mg s/f dispersible tablet           | Penicillin/Beta-lactam                  |
| 1140872600 | floxapen 125mg/5ml syrup - Flucloxacillin               | Penicillin/Beta-lactam                  |
| 1140872608 | floxapen 1g injection (pdr for recon)                   | Penicillin/Beta-lactam                  |
| 1140872596 | floxapen 250mg capsule                                  | Penicillin/Beta-lactam                  |
| 1140872604 | floxapen 250mg injection (pdr for recon)                | Penicillin/Beta-lactam                  |
| 1140872598 | floxapen 500mg capsule                                  | Penicillin/Beta-lactam                  |
| 1140872606 | floxapen 500mg injection (pdr for recon)                | Penicillin/Beta-lactam                  |
| 1140872602 | floxapen forte 250mg/5ml syrup                          | Penicillin/Beta-lactam                  |
| 1140872916 | flu-amp 250/250mg capsule - Flucloxacillin + ampicillin | Penicillin/Beta-lactam                  |
| 1140872622 | fluclomix 250 capsule - flucloxacillin                  | Penicillin/Beta-lactam                  |
| 1140872624 | fluclomix 500 capsule                                   | Penicillin/Beta-lactam                  |
| 1140872694 | flucloxacillin                                          | Penicillin/Beta-lactam                  |



|            |                                                   |                        |
|------------|---------------------------------------------------|------------------------|
| 1141157340 | flucloxacillin product                            | Penicillin/Beta-lactam |
| 1141152134 | flucloxin 125mg/5ml oral suspension               | Penicillin/Beta-lactam |
| 1141152130 | flucloxin 250mg capsule                           | Penicillin/Beta-lactam |
| 1141152132 | flucloxin 500mg capsule                           | Penicillin/Beta-lactam |
| 1140873208 | fortum 1g injection (pdr for recon) - ceftazidime | Cephalosporin          |
| 1140873204 | fortum 250mg injection (pdr for recon)            | Cephalosporin          |
| 1140873108 | fortum 2g infusion (pdr for recon)                | Cephalosporin          |
| 1140873110 | fortum 2g infusion (pdr for recon)+saline kit     | Cephalosporin          |
| 1140873210 | fortum 2g injection (pdr for recon)               | Cephalosporin          |
| 1140864912 | fortum 3g injection (pdr for recon)               | Cephalosporin          |
| 1140873206 | fortum 500mg injection (pdr for recon)            | Cephalosporin          |
| 1141145800 | fortum monovial 2g i-v infusion (pdr for recon)   | Cephalosporin          |
| 1140884076 | fosfomycin                                        | Miscellaneous          |
| 1140873830 | fucidin 250mg tablet                              | Miscellaneous          |
| 1140873832 | fucidin 250mg/5ml suspension                      | Miscellaneous          |
| 1140873834 | fucidin 500mg i-v infusion+buffer                 | Miscellaneous          |
| 1140874186 | furadantin 100mg tablet                           | Miscellaneous          |
| 1140874188 | furadantin 25mg/5ml s/f suspension                | Miscellaneous          |
| 1140874184 | furadantin 50mg tablet                            | Miscellaneous          |
| 1140872968 | galenamox 125mg/5ml s/f suspension                | Penicillin/Beta-lactam |
| 1140856926 | galenamox 125mg/5ml suspension                    | Penicillin/Beta-lactam |
| 1140872964 | galenamox 250mg capsule                           | Penicillin/Beta-lactam |
| 1140872970 | galenamox 250mg/5ml s/f suspension                | Penicillin/Beta-lactam |
| 1140856928 | galenamox 250mg/5ml suspension                    | Penicillin/Beta-lactam |
| 1140872966 | galenamox 500mg capsule                           | Penicillin/Beta-lactam |
| 1140857054 | galenomycin 250mg tablet                          | Tetracycline           |
| 1140872632 | galfloxin 250mg capsule                           | Penicillin/Beta-lactam |
| 1140872634 | galfloxin 500mg capsule                           | Penicillin/Beta-lactam |
| 1140857126 | gantrisin 500mg tablet                            | Sulfonamide Derivative |
| 1140857128 | gantrisin 500mg/5ml syrup                         | Sulfonamide Derivative |
| 1140873574 | gentamicin                                        | Aminoglycoside         |
| 1141190776 | gentamicin 80mg/50ml intravenous infusion         | Aminoglycoside         |
| 1141157498 | gentamicin product                                | Aminoglycoside         |
| 1140856984 | genticin 20mg/2ml paediatric injection            | Aminoglycoside         |
| 1140873586 | genticin 80mg/2ml injection ampoule               | Aminoglycoside         |
| 1140884082 | genticin powder                                   | Aminoglycoside         |
| 1141157224 | grepafloxacin product                             | Fluoroquinolone        |
| 1140874214 | hexamine hippurate - methenamine                  | Miscellaneous          |
| 1140874216 | hiprex 1g tablet - methenamine                    | Miscellaneous          |
| 1140873722 | ilosone 125mg/5ml suspension - Erythromycin       | Macrolide              |
| 1140873714 | ilosone 250mg capsule                             | Macrolide              |
| 1140873718 | ilosone 500mg tablet                              | Macrolide              |
| 1140873620 | ilosone forte 250mg/5ml suspension                | Macrolide              |
| 1140857022 | ilotycin 250mg tablet                             | Macrolide              |
| 1140873350 | imipenem + cilastatin                             | Carbapenem             |

|            |                                                           |                |
|------------|-----------------------------------------------------------|----------------|
| 1140873556 | imperacin 250mg tablet                                    | Tetracycline   |
| 1140910506 | ina - isoniazid                                           | Antitubercular |
| 1140910508 | inah - isoniazid                                          | Antitubercular |
| 1140873976 | ipral 100mg tablet - trimethoprim                         | Miscellaneous  |
| 1140873978 | ipral 200mg tablet                                        | Miscellaneous  |
| 1140857146 | ipral 50mg/5ml paediatric s/f suspension                  | Miscellaneous  |
| 1140856174 | iproniazid                                                | Antitubercular |
| 1140873986 | isoniazid                                                 | Antitubercular |
| 1140873496 | kanamycin                                                 | Aminoglycoside |
| 1141157354 | kanamycin product                                         | Aminoglycoside |
| 1140911716 | kefadim 1g injection (pdr for recon) - ceftazidime        | Cephalosporin  |
| 1140911720 | kefadim 2g infusion (pdr for recon)                       | Cephalosporin  |
| 1140911718 | kefadim 2g injection (pdr for recon)                      | Cephalosporin  |
| 1140911714 | kefadim 500mg injection (pdr for recon)                   | Cephalosporin  |
| 1140873244 | kefadol 1g injection (pdr for recon) - cefamandole        | Cephalosporin  |
| 1140856870 | kefadol 2g injection                                      | Cephalosporin  |
| 1140856868 | kefadol 500mg injection                                   | Cephalosporin  |
| 1140873332 | keflex 125mg/5ml suspension - cephalixin                  | Cephalosporin  |
| 1140873324 | keflex 250mg capsule                                      | Cephalosporin  |
| 1140873328 | keflex 250mg tablet                                       | Cephalosporin  |
| 1140873334 | keflex 250mg/5ml suspension                               | Cephalosporin  |
| 1140873326 | keflex 500mg capsule                                      | Cephalosporin  |
| 1140873330 | keflex 500mg tablet                                       | Cephalosporin  |
| 1140856858 | keflex-c 125mg chewable tablet                            | Cephalosporin  |
| 1140856860 | keflex-c 250mg chewable tablet                            | Cephalosporin  |
| 1140856864 | keflin 1g injection - cefexime                            | Cephalosporin  |
| 1141151884 | keftid 125mg/5ml s/f suspension - cefaclor                | Cephalosporin  |
| 1141146054 | keftid 250mg capsule                                      | Cephalosporin  |
| 1141151886 | keftid 250mg/5ml s/f suspension                           | Cephalosporin  |
| 1141146112 | keftid 500mg capsule                                      | Cephalosporin  |
| 1140873252 | kefzol 1g injection (pdr for recon) - cefazolin           | Cephalosporin  |
| 1140873250 | kefzol 500mg injection (pdr for recon)                    | Cephalosporin  |
| 1140873746 | kemicetine 1g injection (pdr for recon) - chloramphenicol | Miscellaneous  |
| 1141185434 | ketek 400mg tablet - Telithromycin                        | Ketolide       |
| 1140926578 | kiflone 125mg/5ml syrup - Cephalixin                      | Cephalosporin  |
| 1140926572 | kiflone 250mg capsule                                     | Cephalosporin  |
| 1140926576 | kiflone 250mg/5ml syrup                                   | Cephalosporin  |
| 1140926574 | kiflone 500mg capsule                                     | Cephalosporin  |
| 1140926570 | kiflone 500mg tablet                                      | Cephalosporin  |
| 1140873640 | klaricid 125mg/5ml paediatric suspension - clarithromycin | Macrolide      |
| 1140882366 | klaricid 250mg tablet                                     | Macrolide      |
| 1141164834 | klaricid 250mg/5ml paediatric suspension                  | Macrolide      |
| 1140909698 | klaricid 500mg tablet                                     | Macrolide      |

|            |                                                           |                                        |
|------------|-----------------------------------------------------------|----------------------------------------|
| 1141153228 | klaricid adult 250mg/sachet granules                      | Macrolide                              |
| 1140864362 | klaricid iv 500mg injection (pdr for recon)               | Macrolide                              |
| 1141146120 | klaricid xl 500mg m/r tablet                              | Macrolide                              |
| 1140882418 | ladropen 125mg/5ml suspension - flucloxacillin            | Penicillin/Beta-lactam                 |
| 1140872610 | ladropen 250mg capsule - flucloxacillin                   | Penicillin/Beta-lactam                 |
| 1140863598 | ladropen 250mg injection - flucloxacillin                 | Penicillin/Beta-lactam                 |
| 1140872612 | ladropen 500mg capsule - flucloxacillin                   | Penicillin/Beta-lactam                 |
| 1140863600 | ladropen 500mg injection (pdr for recon) - flucloxacillin | Penicillin/Beta-lactam                 |
| 1140874008 | lamprene 100mg capsule - cloflazimine                     | Miscellaneous                          |
| 1140873872 | laratrim 160mg/800mg tablet - Trimethoprim                | Other/Trimethoprim                     |
| 1140857194 | laratrim 480mg tablet - Trimethoprim                      | Other/Trimethoprim                     |
| 1140873874 | laratrim adult suspension - Trimethoprim                  | Other/Trimethoprim                     |
| 1140873928 | laratrim paediatric syrup - Trimethoprim                  | Other/Trimethoprim                     |
| 1140884022 | latamoxef                                                 | Oxacephem                              |
| 1140873390 | ledermycin 150mg capsule - Demeclocycline                 | Tetracycline                           |
| 1140857032 | ledermycin 300mg tablet                                   | Tetracycline                           |
| 1141162668 | levofloxacin                                              | Fluoroquinolone                        |
| 1140857096 | lincocin 250mg/5ml syrup - Lincomycin                     | Lincosamide                            |
| 1140857094 | lincocin 500mg capsule - Lincomycin                       | Lincosamide                            |
| 1140857092 | lincomycin                                                | Lincosamide                            |
| 1141172954 | linezolid                                                 | Oxazolidinone                          |
| 1141166498 | lomefloxacin                                              | Quinolone                              |
| 1140856990 | lugacin 80mg/2ml injection - gentamicin                   | Aminoglycoside                         |
| 1140873474 | lymecycline                                               | Tetracycline                           |
| 1140874198 | macrobid 100mg m/r capsule - nitrofurantoin               | Miscellaneous                          |
| 1140874192 | macrodantin 100mg capsule - nitrofurantoin                | Miscellaneous                          |
| 1140874190 | macrodantin 50mg capsule                                  | Miscellaneous                          |
| 1140872924 | magnapen 1g injection (pdr for recon) - Ampicillin        | Penicillin/Beta-lactam                 |
| 1140872922 | magnapen 500mg injection (pdr for recon)                  | Penicillin/Beta-lactam                 |
| 1140872918 | magnapen capsule                                          | Penicillin/Beta-lactam                 |
| 1140872920 | magnapen syrup                                            | Penicillin/Beta-lactam                 |
| 1140874412 | maloprim tablet - pyrimethamine and dapson                | Antimalarial, Miscellaneous antibiotic |
| 1140856176 | marsilid 25mg tablet - Iproniazid                         | Antitubercular                         |
| 1140856940 | mecillinam                                                | Penicillin/Beta-lactam                 |
| 1140873184 | mefoxin 1g injection (pdr for recon) - cefoxitin          | Cephalosporin                          |
| 1140873186 | mefoxin 2g injection (pdr for recon)                      | Cephalosporin                          |
| 1140856976 | megaclor 170mg capsule - clomocycline                     | Tetracycline                           |
| 1140923752 | meronem 1g infusion kit                                   | Carbapenem                             |
| 1140917240 | meronem 1g injection (pdr for recon) - meropenem          | Carbapenem                             |
| 1140917236 | meronem 250mg injection (pdr for recon)                   | Carbapenem                             |
| 1140923750 | meronem 500mg infusion kit                                | Carbapenem                             |
| 1140917238 | meronem 500mg injection (pdr for recon)                   | Carbapenem                             |
| 1140917228 | meropenem                                                 | Carbapenem                             |

|            |                                                                      |                                    |
|------------|----------------------------------------------------------------------|------------------------------------|
| 1140909748 | methenamine hippurate                                                | Miscellaneous                      |
| 1140884176 | methicillin                                                          | Penicillin/Beta-lactam             |
| 1140857294 | metrolyl 200mg tablet - metronidazole                                | Antibiotic/Amebicide/Antiprotozoal |
| 1140857296 | metrolyl 400mg tablet                                                | Antibiotic/Amebicide/Antiprotozoal |
| 1140857298 | metrolyl 500mg/100ml intravenous infusion amp                        | Antibiotic/Amebicide/Antiprotozoal |
| 1140857300 | metrolyl 500mg/100ml intravenous infusion bag                        | Antibiotic/Amebicide/Antiprotozoal |
| 1140874014 | metronidazole                                                        | Antibiotic/Amebicide/Antiprotozoal |
| 1141157364 | metronidazole product                                                | Antibiotic/Amebicide/Antiprotozoal |
| 1140874030 | metronidazole+nystatin 400mg/10000units<br>tablet+pessary            | Antibiotic/Amebicide/Antiprotozoal |
| 1140874116 | metrozol 500mg/100ml infusion - metronidazole                        | Antibiotic/Amebicide/Antiprotozoal |
| 1140856772 | mezlocillin                                                          | Penicillin/Beta-lactam             |
| 1140873484 | minocin 100mg tablet - minocycline                                   | Tetracycline                       |
| 1140873482 | minocin 50mg tablet - minocycline                                    | Tetracycline                       |
| 1140873488 | minocin mr 100mg m/r capsule - minocycline                           | Tetracycline                       |
| 1140873480 | minocycline                                                          | Tetracycline                       |
| 1140872886 | miraxid 225mg tablet - pivmecillinam                                 | Penicillin/Beta-lactam             |
| 1140856906 | miraxid paediatric sachet                                            | Penicillin/Beta-lactam             |
| 1140872888 | miraxid-450 tablet                                                   | Penicillin/Beta-lactam             |
| 1140873196 | monaspor 1g injection (pdr for recon) -<br>Cefsulodin                | Cephalosporin                      |
| 1140873194 | monaspor 500mg injection (pdr for recon)                             | Cephalosporin                      |
| 1140873876 | monotrim 100mg tablet - Trimethoprim                                 | Other/Trimethoprim                 |
| 1140873882 | monotrim 100mg/5ml injection                                         | Other/Trimethoprim                 |
| 1140873878 | monotrim 200mg tablet                                                | Other/Trimethoprim                 |
| 1140873880 | monotrim 50mg/5ml s/f suspension                                     | Other/Trimethoprim                 |
| 1140855390 | monivent 5mg tablet                                                  | Other/Trimethoprim                 |
| 1140864530 | monuril 3g/sachet granules for suspension -<br>Fosfomycin            | Miscellaneous                      |
| 1140864584 | monuril paediatric 2g/sachet granules for<br>suspension - Fosfomycin | Miscellaneous                      |
| 1140856880 | moxalactam 1g injection                                              | Cephalosporin                      |
| 1140856882 | moxalactam 2g injection                                              | Cephalosporin                      |
| 1140856878 | moxalactam 500mg injection                                           | Cephalosporin                      |
| 1141187100 | moxifloxacin                                                         | Fluoroquinolone                    |
| 1140873914 | myambutol 100mg tablet - ethambutol                                  | Antitubercular                     |
| 1140873916 | myambutol 400mg tablet                                               | Antitubercular                     |
| 1140884302 | myambutol powder                                                     | Antitubercular                     |
| 1140873512 | mycifradin 500mg tablet - neomycin                                   | Aminoglycoside                     |
| 1140883998 | mycifradin powder                                                    | Aminoglycoside                     |
| 1140864484 | mycobutin 150mg capsule - rifabutin                                  | Antitubercular                     |
| 1140857158 | mynah 200mg tablet - ethambutol and isoniazid                        | Antitubercular                     |
| 1140857216 | mynah 365mg tablet                                                   | Antitubercular                     |
| 1140873918 | mynah-250 tablet                                                     | Antitubercular                     |
| 1140873920 | mynah-300 tablet                                                     | Antitubercular                     |
| 1140857062 | mysteclin capsule - nystatin and tetracycline                        | Miscellaneous                      |

|            |                                                               |                                      |
|------------|---------------------------------------------------------------|--------------------------------------|
| 1140857064 | mysteclin syrup - tetracycline hydrochloride and amphotericin | Miscellaneous                        |
| 1140873568 | mysteclin tablet                                              | Miscellaneous                        |
| 1140874220 | nalidixic acid                                                | Quinolone                            |
| 1140873538 | nebcin 20mg/2ml injection                                     | Aminoglycoside                       |
| 1140873540 | nebcin 40mg/1ml injection                                     | Aminoglycoside                       |
| 1140873542 | nebcin 80mg/2ml injection                                     | Aminoglycoside                       |
| 1140910816 | nebramycin factor vi                                          | Aminoglycoside                       |
| 1140874230 | negram 300mg/5ml s/f suspension                               | Quinolone                            |
| 1140874228 | negram 500mg tablet                                           | Quinolone                            |
| 1140884090 | neomycin product                                              | Aminoglycoside                       |
| 1140873520 | netillin 100mg/1ml injection - netilmicin                     | Aminoglycoside                       |
| 1140873522 | netillin 150mg/1.5ml injection                                | Aminoglycoside                       |
| 1140873516 | netillin 15mg/1.5ml injection                                 | Aminoglycoside                       |
| 1140873524 | netillin 200mg/2ml injection                                  | Aminoglycoside                       |
| 1140873518 | netillin 50mg/1ml injection                                   | Aminoglycoside                       |
| 1140873514 | netilmicin                                                    | Aminoglycoside                       |
| 1141169416 | nicef 250mg capsule - cefradine                               | Cephalosporin                        |
| 1141169418 | nicef 500mg capsule                                           | Cephalosporin                        |
| 1140857306 | nidazol 200mg tablet                                          | Amebicide, Antibiotic, Antiprotozoal |
| 1140857346 | nimorazole                                                    | Nitroimidazole                       |
| 1140874126 | nitrofurantoin                                                | Miscellaneous                        |
| 1140873508 | nivemycin 100mg/5ml elixir                                    | Aminoglycoside                       |
| 1140873506 | nivemycin 500mg tablet                                        | Aminoglycoside                       |
| 1140874178 | norfloxacin                                                   | Fluoroquinolone                      |
| 1140865702 | normax capsule - norfloxacin                                  | Fluoroquinolone                      |
| 1140882564 | norzol 200mg/5ml suspension                                   | Amebicide, Antibiotic, Antiprotozoal |
| 1140874160 | ofloxacin                                                     | Fluoroquinolone                      |
| 1140884008 | oral erythromycin                                             | Macrolide                            |
| 1140856778 | orbenin 125mg/5ml syrup - cloxacillin                         | Penicillin/Beta-lactam               |
| 1140856780 | orbenin 1g injection                                          | Penicillin/Beta-lactam               |
| 1140872676 | orbenin 250mg capsule                                         | Penicillin/Beta-lactam               |
| 1140872680 | orbenin 250mg injection (pdr for recon)                       | Penicillin/Beta-lactam               |
| 1140872678 | orbenin 500mg capsule                                         | Penicillin/Beta-lactam               |
| 1140872682 | orbenin 500mg injection (pdr for recon)                       | Penicillin/Beta-lactam               |
| 1140882332 | orelox 100mg tablet - Cefpodoxime                             | Cephalosporin                        |
| 1140917474 | orelox 40mg/5ml paediatric suspension                         | Cephalosporin                        |
| 1140873558 | oxymycin 250mg tablet                                         | Tetracycline                         |
| 1140873548 | oxytetracycline                                               | Tetracycline                         |
| 1140873564 | oxytetramix 250 tablet - oxytetracycline                      | Tetracycline                         |
| 1140884012 | parenteral erythromycin                                       | Macrolide                            |
| 1140910444 | pen g - benzylpenicillin                                      | Penicillin/Beta-lactam               |
| 1140856732 | penbritin 125mg tablet - ampicillin                           | Penicillin/Beta-lactam               |
| 1140872848 | penbritin 125mg/1.25ml paediatric suspension                  | Penicillin/Beta-lactam               |
| 1140872844 | penbritin 125mg/5ml syrup                                     | Penicillin/Beta-lactam               |

|            |                                                                                     |                        |
|------------|-------------------------------------------------------------------------------------|------------------------|
| 1140872838 | penbritin 250mg capsule                                                             | Penicillin/Beta-lactam |
| 1140872850 | penbritin 250mg injection (pdr for recon)                                           | Penicillin/Beta-lactam |
| 1140872846 | penbritin 250mg/5ml syrup                                                           | Penicillin/Beta-lactam |
| 1140872840 | penbritin 500mg capsule                                                             | Penicillin/Beta-lactam |
| 1140872904 | penbritin 500mg injection (pdr for recon)                                           | Penicillin/Beta-lactam |
| 1140882498 | penicillin                                                                          | Penicillin/Beta-lactam |
| 1140909716 | penicillin g                                                                        | Penicillin/Beta-lactam |
| 1140888758 | penicillin v                                                                        | Penicillin/Beta-lactam |
| 1140856608 | penidural 229mg/5ml suspension - benzylpenicillin                                   | Penicillin/Beta-lactam |
| 1140856612 | penidural-1a 2.29g/10ml injection                                                   | Penicillin/Beta-lactam |
| 1141172120 | periostat 20mg capsule - doxycycline                                                | Tetracycline           |
| 1141184388 | periostat 20mg tablet                                                               | Tetracycline           |
| 1140856618 | phenethicillin                                                                      | Penicillin/Beta-lactam |
| 1140872590 | phenoxyethylpenicillin                                                              | Penicillin/Beta-lactam |
| 1140857206 | phthalylsulphathiazole                                                              | Sulfonamide            |
| 1140872852 | piperacillin                                                                        | Penicillin/Beta-lactam |
| 1140882324 | piperacillin+tazobactam                                                             | Penicillin/Beta-lactam |
| 1140872854 | pipril 1g injection (pdr for recon) - piperacillin                                  | Penicillin/Beta-lactam |
| 1140872856 | pipril 2g injection (pdr for recon)                                                 | Penicillin/Beta-lactam |
| 1140872858 | pipril 4g infusion (pdr for recon)                                                  | Penicillin/Beta-lactam |
| 1140872860 | pipril 4g infusion set                                                              | Penicillin/Beta-lactam |
| 1140872882 | pivampicillin                                                                       | Penicillin/Beta-lactam |
| 1141157346 | pivampicillin product                                                               | Penicillin/Beta-lactam |
| 1140882432 | pivampicillin+pivmecillinam                                                         | Penicillin/Beta-lactam |
| 1140884178 | pivmecillinam                                                                       | Penicillin/Beta-lactam |
| 1140873842 | polymyxin b                                                                         | Miscellaneous          |
| 1140857166 | polymyxin b 500,000units injection                                                  | Miscellaneous          |
| 1140882560 | polymyxins                                                                          | Miscellaneous          |
| 1140882426 | pondocillin 175mg/5ml s/f suspension                                                | Penicillin/Beta-lactam |
| 1140856904 | pondocillin 175mg/sachet granules                                                   | Penicillin/Beta-lactam |
| 1140872884 | pondocillin 500mg tablet                                                            | Penicillin/Beta-lactam |
| 1140856908 | pondocillin plus tablet                                                             | Penicillin/Beta-lactam |
| 1141163716 | primacine 125mg/5ml suspension - erythromycin                                       | Macrolide              |
| 1141163778 | primacine 250mg/5ml suspension - erythromycin                                       | Macrolide              |
| 1141163784 | primacine 500mg/5ml suspension - erythromycin                                       | Macrolide              |
| 1140873360 | primaxin im 500mg intramuscular injection (pdr for recon) - imipenem and cilastatin | Carbapenem             |
| 1140873356 | primaxin iv 250mg intravenous infusion (pdr for recon) - imipenem and cilastatin    | Carbapenem             |
| 1140873358 | primaxin iv 500mg intravenous infusion (pdr for recon)                              | Carbapenem             |
| 1140917210 | primaxin iv 500mg monovial                                                          | Carbapenem             |
| 1140872668 | procaine penicillin                                                                 | Penicillin/Beta-lactam |

|            |                                                                    |                        |
|------------|--------------------------------------------------------------------|------------------------|
| 1141187764 | promixin 1million units injection (pdr for recon) - Colistimethate | Miscellaneous          |
| 1140872984 | pyopen 1g injection (pdr for recon) - carbenacillin                | Penicillin/Beta-lactam |
| 1140872986 | pyopen 5g injection (pdr for recon)                                | Penicillin/Beta-lactam |
| 1140873998 | pyrazinamide                                                       | Antitubercular         |
| 1141166128 | quinupristin+dalfopristin                                          | Streptogramin          |
| 1140873410 | ramysis 100mg capsule - doxycycline                                | Tetracycline           |
| 1141173702 | ranclav 125mg/31mg s/f suspension - amoxicillin and clavulanate    | Penicillin/Beta-lactam |
| 1141173760 | ranclav 250mg/62mg s/f suspension - amoxicillin and clavulanate    | Penicillin/Beta-lactam |
| 1141173698 | ranclav 375mg tablet - amoxicillin and clavulanate                 | Penicillin/Beta-lactam |
| 1141173700 | ranclav 625mg tablet - amoxicillin and clavulanate                 | Penicillin/Beta-lactam |
| 1141157230 | raxar 400mg tablet - grepafloxacin                                 | Fluoroquinolone        |
| 1141157232 | raxar 600mg tablet - grepafloxacin                                 | Fluoroquinolone        |
| 1141152204 | respillin 125mg/5ml oral suspension - amoxicillin                  | Penicillin/Beta-lactam |
| 1141152208 | respillin 125mg/5ml s/f suspension - amoxicillin                   | Penicillin/Beta-lactam |
| 1141152200 | respillin 250mg capsule - amoxicillin                              | Penicillin/Beta-lactam |
| 1141152206 | respillin 250mg/5ml oral suspension - amoxicillin                  | Penicillin/Beta-lactam |
| 1141152210 | respillin 250mg/5ml s/f suspension - amoxicillin                   | Penicillin/Beta-lactam |
| 1141152202 | respillin 500mg capsule - amoxicillin                              | Penicillin/Beta-lactam |
| 1140873622 | retcin 250mg e/c tablet - erythromycin                             | Macrolide              |
| 1140864480 | rifabutin                                                          | Antitubercular         |
| 1140874068 | rifadin 100mg/5ml syrup - rifampin                                 | Antitubercular         |
| 1140874064 | rifadin 150mg capsule - rifampin                                   | Antitubercular         |
| 1140874066 | rifadin 300mg capsule - rifampin                                   | Antitubercular         |
| 1140857220 | rifadin 300mg intravenous infusion - rifampin                      | Antitubercular         |
| 1140874070 | rifadin 600mg injection+solvent - rifampin                         | Antitubercular         |
| 1140874056 | rifampicin                                                         | Antitubercular         |
| 1141157360 | rifampicin product                                                 | Antitubercular         |
| 1140882548 | rifampicin+isoniazid                                               | Antitubercular         |
| 1140874096 | rifampicin+isoniazid 300mg/150mg tablet                            | Antitubercular         |
| 1140882550 | rifampicin+isoniazid+pyrazinamide                                  | Antitubercular         |
| 1140874080 | rifater tablet - Rifampin, Isoniazid, and Pyrazinamide             | Antitubercular         |
| 1140874082 | rifinah 150 tablet - Rifampin and Isoniazid                        | Antitubercular         |
| 1140874084 | rifinah 300 tablet - Rifampin and Isoniazid                        | Antitubercular         |
| 1140872770 | rimacillin 125mg/5ml syrup - ampicillin                            | Penicillin/Beta-lactam |
| 1140872766 | rimacillin 250mg capsule                                           | Penicillin/Beta-lactam |
| 1140872772 | rimacillin 250mg/5ml syrup                                         | Penicillin/Beta-lactam |
| 1140872768 | rimacillin 500mg capsule                                           | Penicillin/Beta-lactam |
| 1140874076 | rimactane 100mg/5ml syrup - rifampin                               | Antitubercular         |
| 1140874072 | rimactane 150mg capsule- rifampin                                  | Antitubercular         |
| 1140874074 | rimactane 300mg capsule- rifampin                                  | Antitubercular         |
| 1140874078 | rimactane 300mg injection+diluent- rifampin                        | Antitubercular         |

|            |                                                                                 |                                      |
|------------|---------------------------------------------------------------------------------|--------------------------------------|
| 1140874086 | rimactazid-150 tablet - Rifampin and Isoniazid                                  | Antitubercular                       |
| 1140874088 | rimactazid-300 tablet - Rifampin and Isoniazid                                  | Antitubercular                       |
| 1140857222 | rimactazid-300 tablets cp - Rifampin and Isoniazid                              | Antitubercular                       |
| 1140872658 | rimapen 250mg tablet - rifampin                                                 | Antitubercular                       |
| 1140873994 | rimifon 50mg/2ml injection - isoniazid                                          | Antitubercular                       |
| 1140872972 | rimoxallin 125mg/5ml syrup                                                      | Penicillin/Beta-lactam               |
| 1140872974 | rimoxallin 250mg capsule                                                        | Penicillin/Beta-lactam               |
| 1140872978 | rimoxallin 250mg/5ml syrup                                                      | Penicillin/Beta-lactam               |
| 1140872976 | rimoxallin 500mg capsule                                                        | Penicillin/Beta-lactam               |
| 1140873438 | rocephin 1g injection (pdr for recon)                                           | Cephalosporin                        |
| 1140873436 | rocephin 250mg injection (pdr for recon)                                        | Cephalosporin                        |
| 1140873440 | rocephin 2g injection (pdr for recon)                                           | Cephalosporin                        |
| 1140873690 | rommix 125 suspension - erythromycin                                            | Macrolide                            |
| 1140873692 | rommix 250 e/c tablet - erythromycin                                            | Macrolide                            |
| 1140873698 | rommix 500 e/c tablet - erythromycin                                            | Macrolide                            |
| 1140909746 | rosoxacin                                                                       | Quinolone                            |
| 1140922052 | rovamycine 125mg/5ml syrup                                                      | Macrolide                            |
| 1140922048 | rovamycine 250mg tablet                                                         | Macrolide                            |
| 1141191010 | sebomin mr 100mg m/r capsule - minocycline                                      | Tetracycline                         |
| 1140873070 | securopen 1g injection (pdr for recon) - Mezlocillin                            | Penicillin/Beta-lactam               |
| 1140873072 | securopen 2g injection (pdr for recon) - Mezlocillin                            | Penicillin/Beta-lactam               |
| 1140873068 | securopen 500mg injection (pdr for recon) - Mezlocillin                         | Penicillin/Beta-lactam               |
| 1140873074 | securopen 5g infusion (pdr for recon) - Mezlocillin                             | Penicillin/Beta-lactam               |
| 1140882326 | securopen 5g infusion set - Mezlocillin                                         | Penicillin/Beta-lactam               |
| 1140856954 | selexid 100mg/sachet suspension - Pivmecillinam                                 | Penicillin/Beta-lactam               |
| 1140856952 | selexid 200mg tablet - Pivmecillinam                                            | Penicillin/Beta-lactam               |
| 1140856942 | selexidin 200mg injection - Mecillin                                            | Penicillin/Beta-lactam               |
| 1140856944 | selexidin 400mg injection - Mecillin                                            | Penicillin/Beta-lactam               |
| 1140873932 | septrin 480mg dispersible tablet - Sulfamethoxazole and Trimethoprim            | Miscellaneous/Sulfonamide derivative |
| 1140873930 | septrin 480mg tablet - Sulfamethoxazole and Trimethoprim                        | Miscellaneous/Sulfonamide derivative |
| 1140873940 | septrin 480mg/5ml intravenous infusion - Sulfamethoxazole and Trimethoprim      | Miscellaneous/Sulfonamide derivative |
| 1140857198 | septrin 960mg/3ml intramuscular injection - Sulfamethoxazole and Trimethoprim   | Miscellaneous/Sulfonamide derivative |
| 1140873936 | septrin adult suspension - Sulfamethoxazole and Trimethoprim                    | Miscellaneous/Sulfonamide derivative |
| 1140873934 | septrin forte 960mg tablet - Sulfamethoxazole and Trimethoprim                  | Miscellaneous/Sulfonamide derivative |
| 1140857196 | septrin paediatric 120mg dispersible tablet - Sulfamethoxazole and Trimethoprim | Miscellaneous/Sulfonamide derivative |
| 1140873938 | septrin paediatric s/f suspension - Sulfamethoxazole and Trimethoprim           | Miscellaneous/Sulfonamide derivative |



|            |                                                                      |                                                 |
|------------|----------------------------------------------------------------------|-------------------------------------------------|
| 1140856992 | soframycin 250mg tablet                                              | Aminoglycoside                                  |
| 1140873844 | spectinomycin                                                        | Aminoglycoside                                  |
| 1140922030 | spiramycin                                                           | Macrolide                                       |
| 1140872664 | stabillin v-k 125mg/5ml elixir                                       | Penicillin/Beta-lactam                          |
| 1140872662 | stabillin v-k 250mg tablet                                           | Penicillin/Beta-lactam                          |
| 1140872666 | stabillin v-k 250mg/5ml elixir                                       | Penicillin/Beta-lactam                          |
| 1140856706 | stabillin v-k 62.5mg/5ml syrup                                       | Penicillin/Beta-lactam                          |
| 1140872614 | stafoxil 250mg capsule - flucloxacillin                              | Penicillin/Beta-lactam                          |
| 1140872616 | stafoxil 500mg capsule                                               | Penicillin/Beta-lactam                          |
| 1140856792 | staphlipen 1g injection - flucloxacillin                             | Penicillin/Beta-lactam                          |
| 1140856784 | staphlipen 250mg capsule - flucloxacillin                            | Penicillin/Beta-lactam                          |
| 1140856788 | staphlipen 250mg injection - flucloxacillin                          | Penicillin/Beta-lactam                          |
| 1140856786 | staphlipen 500mg capsule - flucloxacillin                            | Penicillin/Beta-lactam                          |
| 1140856790 | staphlipen 500mg injection (pdr for recon) - flucloxacillin          | Penicillin/Beta-lactam                          |
| 1140874098 | streptomycin                                                         | Aminoglycoside/Antitubercular                   |
| 1140857108 | streptotriad tablet - streptomycin & sulphadiazine & sulphamerazine  | Miscellaneous                                   |
| 1140856752 | subactam ampicillin 750mg injection                                  | Penicillin/Beta-lactam/Beta-lactamase inhibitor |
| 1141182178 | sulfacetamide                                                        | Sulfonamide                                     |
| 1141182110 | sulfadiazine                                                         | Sulfonamide                                     |
| 1141182122 | sulfadimidine                                                        | Sulfonamide                                     |
| 1141182124 | sulfadimidine 500mg/5ml paediatric suspension                        | Sulfonamide                                     |
| 1141195112 | sulfaguanidine                                                       | Sulfonamide                                     |
| 1140873950 | sulfametopyrazine                                                    | Sulfonamide                                     |
| 1140873956 | sulphadiazine                                                        | Sulfonamide                                     |
| 1140857112 | sulphadimethoxine                                                    | Sulfonamide                                     |
| 1140873962 | sulphadimidine                                                       | Sulfonamide                                     |
| 1140857120 | sulphadimidine 500mg/5ml paediatric suspension                       | Sulfonamide                                     |
| 1140857134 | sulphaguanidine                                                      | Sulfonamide                                     |
| 1140857110 | sulphatriad tablet - Sulfamerazine, Sulphadiazine and Sulphathiazole | Miscellaneous                                   |
| 1140857138 | sulphaurea - Sulfacarbamide                                          | Miscellaneous                                   |
| 1140856750 | sultamicillin 375mg tablet                                           | Penicillin/Beta-lactam                          |
| 1140882330 | suprax 100mg/5ml paediatric oral suspension - cefexime               | Cephalosporin                                   |
| 1141200706 | suprax 100mg/5ml paediatric suspension 50ml - cefexime               | Cephalosporin                                   |
| 1140873422 | suprax 200mg tablet - cefexime                                       | Cephalosporin                                   |
| 1140873368 | sustamycin 250mg m/r capsule                                         | Tetracycline                                    |
| 1141166132 | synercid infusion (pdr for recon) - Quinupristin and Dalfopristin    | Streptogramin                                   |
| 1140868512 | syntex menophase tablet - polymyxin B                                | Miscellaneous                                   |
| 1140857148 | syraprim 100mg tablet - Sulfamethoxazole                             | Sulfonamide                                     |
| 1140857152 | syraprim 100mg/5ml injection - Sulfamethoxazole                      | Sulfonamide                                     |

|            |                                                                                |                        |
|------------|--------------------------------------------------------------------------------|------------------------|
| 1140857150 | syraprim 300mg tablet - Sulfamethoxazole                                       | Sulfonamide            |
| 1140884168 | talampicillin                                                                  | Penicillin/Beta-lactam |
| 1140856918 | talpen 125mg/5ml syrup - talampicillin napsylate                               | Penicillin/Beta-lactam |
| 1140856916 | talpen 250mg tablet - talampicillin napsylate                                  | Penicillin/Beta-lactam |
| 1140873776 | targocid 200mg injection (pdr for recon)+diluent<br>- Teicoplanin              | Miscellaneous          |
| 1140873774 | targocid 400mg injection (pdr for recon)+diluent<br>- Teicoplanin              | Miscellaneous          |
| 1140874170 | tarivid 100mg/50ml intravenous infusion -<br>Ofloxacin                         | Fluoroquinolone        |
| 1140874164 | tarivid 200mg tablet - Ofloxacin                                               | Fluoroquinolone        |
| 1140874166 | tarivid 200mg/100ml intravenous infusion -<br>Ofloxacin                        | Fluoroquinolone        |
| 1140874174 | tarivid 400mg tablet - Ofloxacin                                               | Fluoroquinolone        |
| 1141162676 | tavanic 250mg tablet - Levofloxacin                                            | Fluoroquinolone        |
| 1141162678 | tavanic 500mg tablet - Levofloxacin                                            | Fluoroquinolone        |
| 1141162680 | tavanic 500mg/100ml intravenous infusion -<br>Levofloxacin                     | Fluoroquinolone        |
| 1140872862 | tazocin 2g/250mg injection (pdr for recon) -<br>Piperacillin and Tazobactam    | Penicillin/Beta-lactam |
| 1140872864 | tazocin 4g/500mg infusion (pdr for recon)+kit -<br>Piperacillin and Tazobactam | Penicillin/Beta-lactam |
| 1140872866 | tazocin 4g/500mg injection (pdr for recon) -<br>Piperacillin and Tazobactam    | Penicillin/Beta-lactam |
| 1140857238 | tefloxx 300mg tablet - Temafloxacin                                            | Fluoroquinolone        |
| 1140857240 | tefloxx 400mg tablet - Temafloxacin                                            | Fluoroquinolone        |
| 1140873768 | teicoplanin                                                                    | Miscellaneous          |
| 1141185430 | telithromycin                                                                  | Ketolide               |
| 1140857336 | temafloxacin                                                                   | Fluoroquinolone        |
| 1140872638 | temocillin                                                                     | Penicillin/Beta-lactam |
| 1141157342 | temocillin product                                                             | Penicillin/Beta-lactam |
| 1140872642 | temopen 1g injection (pdr for recon) - Temocillin                              | Penicillin/Beta-lactam |
| 1140856802 | temopen 500mg injection (pdr for recon) -<br>Temocillin                        | Penicillin/Beta-lactam |
| 1141152218 | tenkicin 250mg tablet - Pencillin VK                                           | Penicillin/Beta-lactam |
| 1140917216 | tenkorex 125mg/5ml suspension - Cefalexin                                      | Cephalosporin          |
| 1140917212 | tenkorex 250mg capsule - Cefalexin                                             | Cephalosporin          |
| 1140917218 | tenkorex 250mg/5ml suspension - Cefalexin                                      | Cephalosporin          |
| 1140917214 | tenkorex 500mg capsule - Cefalexin                                             | Cephalosporin          |
| 1140917220 | tenkorex 500mg tablet - Cefalexin                                              | Cephalosporin          |
| 1140873560 | terramycin 250mg capsule                                                       | Tetracycline           |
| 1140873562 | terramycin 250mg tablet                                                        | Tetracycline           |
| 1140873370 | tetrabid-organon 250mg m/r capsule                                             | Tetracycline           |
| 1140873372 | tetrachel 250mg capsule - tetracycline                                         | Tetracycline           |
| 1140873374 | tetrachel 250mg tablet - tetracycline                                          | Tetracycline           |
| 1140873450 | tetracycline                                                                   | Tetracycline           |
| 1140873570 | tetracycline+nystatin 250mg/250ku tablet                                       | Tetracycline           |
| 1140873376 | tetracycline+procaine 100mg/40mg<br>intramuscular injection                    | Tetracycline           |

|            |                                                                                 |                                    |
|------------|---------------------------------------------------------------------------------|------------------------------------|
| 1140857044 | tetralysal 204mg capsule - Lymecycline                                          | Tetracycline                       |
| 1140873476 | tetralysal 300 capsule - Lymecycline                                            | Tetracycline                       |
| 1140856960 | tetrex 250mg capsule                                                            | Tetracycline                       |
| 1140873000 | ticar 1g injection (pdr for recon) - ticarcillin                                | Penicillin/Beta-lactam             |
| 1140856932 | ticar 3g injection - ticarcillin                                                | Penicillin/Beta-lactam             |
| 1140873004 | ticar 5g infusion set - ticarcillin                                             | Penicillin/Beta-lactam             |
| 1140873002 | ticar 5g injection (pdr for recon) - ticarcillin                                | Penicillin/Beta-lactam             |
| 1140872998 | ticarcillin                                                                     | Penicillin/Beta-lactam             |
| 1140882328 | ticarcillin+clavulanic acid                                                     | Penicillin/Beta-lactam             |
| 1140923616 | tiloryth 250mg e/c granules in capsule - Erythromycin                           | Macrolide                          |
| 1140873428 | timecef 1g injection (pdr for recon) - Cefodizime                               | Cephalosporin                      |
| 1140863512 | timecef 2g injection - Cefodizime                                               | Cephalosporin                      |
| 1140873006 | timentin 1.6g injection (pdr for recon) - Ticarcillin and Clavulanate Potassium | Penicillin/Beta-lactam             |
| 1140873008 | timentin 3.2g injection (pdr for recon) - Ticarcillin and Clavulanate Potassium | Penicillin/Beta-lactam             |
| 1140856934 | timentin 800mg injection - Ticarcillin and Clavulanate Potassium                | Penicillin/Beta-lactam             |
| 1140874118 | tinidazole                                                                      | Antibiotic/Amebicide/Antiprotozoal |
| 1140873536 | tobramycin                                                                      | Aminoglycoside                     |
| 1141157396 | tobramycin product                                                              | Aminoglycoside                     |
| 1140873966 | trimethoprim                                                                    | Miscellaneous                      |
| 1140873888 | trimogal 100mg tablet - Trimethoprim                                            | Miscellaneous                      |
| 1140873890 | trimogal 200mg tablet - Trimethoprim                                            | Miscellaneous                      |
| 1140873892 | trimopan 100mg tablet - Trimethoprim                                            | Miscellaneous                      |
| 1140873894 | trimopan 200mg tablet - Trimethoprim                                            | Miscellaneous                      |
| 1140873896 | trimopan 50mg/5ml s/f suspension - Trimethoprim                                 | Miscellaneous                      |
| 1140856604 | triplopen injection - Penicillin                                                | Penicillin/Beta-lactam             |
| 1140873898 | triprimix 200 tablet - trimethoprim                                             | Miscellaneous                      |
| 1140873846 | trobicin 2g injection+diluent - spectinomycin                                   | Aminoglycoside                     |
| 1140856748 | unasyn 375mg tablet - Ampicillin and Sulbactam                                  | Penicillin/Beta-lactam             |
| 1140856746 | unasyn 750mg/10ml injection - Ampicillin and Sulbactam                          | Penicillin/Beta-lactam             |
| 1140857056 | unimycin 250mg capsule                                                          | Tetracycline                       |
| 1140874196 | urantoin 100mg tablet - Nitrofurantoin                                          | Miscellaneous                      |
| 1140874194 | urantoin 50mg tablet                                                            | Miscellaneous                      |
| 1140874232 | uriben 300mg/5ml suspension - Nalidixic Acid                                    | Quinolone                          |
| 1140872994 | uticillin 500mg tablet                                                          | Penicillin/Beta-lactam             |
| 1140882460 | utinor 400mg tablet - norfloxacin                                               | Fluoroquinolone                    |
| 1140874046 | vaginyl 200mg tablet - metronidazole                                            | Antibiotic/Amebicide/Antiprotozoal |
| 1140874048 | vaginyl 400mg tablet                                                            | Antibiotic/Amebicide/Antiprotozoal |
| 1140873748 | vancocin 125mg matrigel capsule - Vancomycin                                    | Vancomycin                         |
| 1140873750 | vancocin 250mg matrigel capsule - Vancomycin                                    | Vancomycin                         |
| 1140873756 | vancocin cp 1g injection (pdr for recon) - Vancomycin                           | Vancomycin                         |

|            |                                                                |                                    |
|------------|----------------------------------------------------------------|------------------------------------|
| 1140873754 | vancocin cp 250mg injection (pdr for recon) - Vancomycin       | Vancomycin                         |
| 1140873752 | vancocin cp 500mg injection (pdr for recon) - Vancomycin       | Vancomycin                         |
| 1140884142 | vancocin powder - Vancomycin                                   | Vancomycin                         |
| 1140873850 | vancomycin                                                     | Vancomycin                         |
| 1140856710 | v-cil-k 125mg tablet - Penicillin V Potassium                  | Penicillin/Beta-lactam             |
| 1140856708 | v-cil-k 250mg capsule - Penicillin V Potassium                 | Penicillin/Beta-lactam             |
| 1140856712 | v-cil-k 250mg tablet - Penicillin V Potassium                  | Penicillin/Beta-lactam             |
| 1140856718 | v-cil-k 250mg/5ml syrup - Penicillin V Potassium               | Penicillin/Beta-lactam             |
| 1140856716 | v-cil-k paediatric 125mg/5ml syrup - Penicillin V Potassium    | Penicillin/Beta-lactam             |
| 1140856714 | v-cil-k paediatric 62.5mg/5ml syrup - Penicillin V Potassium   | Penicillin/Beta-lactam             |
| 1140873268 | velosef 1g injection (pdr for recon) - Cephadrine              | Cephalosporin                      |
| 1140873260 | velosef 250mg capsule - Cephadrine                             | Cephalosporin                      |
| 1140873264 | velosef 250mg/5ml syrup - Cephadrine                           | Cephalosporin                      |
| 1140873262 | velosef 500mg capsule - Cephadrine                             | Cephalosporin                      |
| 1140873266 | velosef 500mg injection (pdr for recon) - Cephadrine           | Cephalosporin                      |
| 1140873402 | vibramycin 100mg capsule - Doxycycline                         | Tetracycline                       |
| 1140873400 | vibramycin 50mg capsule - Doxycycline                          | Tetracycline                       |
| 1140857038 | vibramycin 50mg/5ml syrup - Doxycycline                        | Tetracycline                       |
| 1141152966 | vibramycin acne pack 50mg capsule - Doxycycline                | Tetracycline                       |
| 1140873404 | vibramycin-d 100mg dispersible tablet - Doxycycline            | Tetracycline                       |
| 1140856734 | vidopen 125mg/5ml syrup - Ampicillin                           | Penicillin/Beta-lactam             |
| 1140872906 | vidopen 250mg capsule - Ampicillin                             | Penicillin/Beta-lactam             |
| 1140909542 | vidopen 250mg injection (pdr for recon) - Ampicillin           | Penicillin/Beta-lactam             |
| 1140856736 | vidopen 250mg/5ml syrup - Ampicillin                           | Penicillin/Beta-lactam             |
| 1140872908 | vidopen 500mg capsule - Ampicillin                             | Penicillin/Beta-lactam             |
| 1140909544 | vidopen 500mg injection (pdr for recon) - Ampicillin           | Penicillin/Beta-lactam             |
| 1140852878 | walachol tablet - Vibramycin-D (Doxycycline)                   | Tetracycline                       |
| 1140874050 | zadstat 200mg tablet - Metronidazole                           | Antibiotic/Amebicide/Antiprotozoal |
| 1140874052 | zadstat 500mg/100ml infusion                                   | Antibiotic/Amebicide/Antiprotozoal |
| 1140873154 | zinacef 1.5g infusion (pdr for recon) - Cefuroxime             | Cephalosporin                      |
| 1140873144 | zinacef 1.5g injection (pdr for recon) - Cefuroxime            | Cephalosporin                      |
| 1140873140 | zinacef 250mg injection (pdr for recon) - Cefuroxime           | Cephalosporin                      |
| 1140873220 | zinacef 750mg infusion (pdr for recon)+saline kit - Cefuroxime | Cephalosporin                      |
| 1140873142 | zinacef 750mg injection (pdr for recon) - Cefuroxime           | Cephalosporin                      |
| 1140873224 | zinacef+metronidazole 750mg/500mg infusion kit - Cefuroxime    | Cephalosporin                      |
| 1140874000 | zinamide 500mg tablet - Pyrazinamide                           | Antitubercular                     |

|            |                                                          |                        |
|------------|----------------------------------------------------------|------------------------|
| 1140873146 | zinnat 125mg tablet - Cefuroxime                         | Cephalosporin          |
| 1140873156 | zinnat 125mg/5ml suspension - Cefuroxime                 | Cephalosporin          |
| 1140873216 | zinnat 125mg/sachet granules - Cefuroxime                | Cephalosporin          |
| 1140873148 | zinnat 250mg tablet - Cefuroxime                         | Cephalosporin          |
| 1140882364 | zithromax 200mg/5ml oral suspension - Azithromycin       | Macrolide              |
| 1140873648 | zithromax 250mg capsule - Azithromycin                   | Macrolide              |
| 1141168372 | zithromax 500mg tablet - Azithromycin                    | Macrolide              |
| 1141185040 | ziz forte 25mg tablet - Azithromycin                     | Macrolide              |
| 1140926868 | zoxin 250 capsule - Cefoxitin                            | Cephalosporin          |
| 1140926870 | zoxin 500 capsule - Cefoxitin                            | Cephalosporin          |
| 1140926968 | zoxycil 250 capsule - Amoxicillin                        | Penicillin/Beta-lactam |
| 1140926970 | zoxycil 500 capsule - Amoxicillin                        | Penicillin/Beta-lactam |
| 1141179928 | zyvox 100mg/5ml granules for oral suspension - Linezolid | Oxazolidinone          |
| 1141172958 | zyvox 600mg tablet - Linezolid                           | Oxazolidinone          |
| 1141172970 | zyvox 600mg/300ml infusion solution - Linezolid          | Oxazolidinone          |

**Supplemental Table IV. Single nucleotide variants used for determining lipid polygenic scores.** Data are derived from the Global Lipid Genetics Consortium exome array analysis, which has been described previously<sup>1</sup>. Abbreviations: Chromosome (Chr), position (Pos), effect allele (EA), non-effect allele (NEA), effect allele frequency (EAF), high-density lipoprotein cholesterol (HDL-C), low-density lipoprotein cholesterol (LDL-C), triglycerides (TG), and standard error (SE).

| Chr:Pos      | rsID       | Gene    | EA | NEA | Reported EAF | HDL-C Beta (SE)          | LDL-C Beta (SE)          | TG Beta (SE)             |
|--------------|------------|---------|----|-----|--------------|--------------------------|--------------------------|--------------------------|
| 9:5073770    | rs77375493 | JAK2    | T  | G   | 0.00114      | -0.2125<br>(0.047737)    | -0.2952<br>(0.048864)    | -0.05854<br>(0.048064)   |
| 8:55421614   | rs10102164 | NA      | A  | G   | 0.202        | -0.0048487<br>(0.00315)  | 0.0309521<br>(0.003265)  | 0.01497<br>(0.003211)    |
| 1:172346548  | rs1011731  | DNM3    | A  | G   | 0.5598       | 0.01474<br>(0.002632)    | -0.003828<br>(0.00273)   | -0.0149772<br>(0.002683) |
| 11:18632984  | rs10128711 | SPTY2D1 | C  | T   | 0.6911       | 0.003188<br>(0.00314)    | 0.02502<br>(0.003254)    | 0.007655<br>(0.003207)   |
| 5:131744574  | rs1016988  | NA      | C  | T   | 0.2223       | -0.0033999<br>(0.003092) | -0.019644<br>(0.003195)  | 0.0087692<br>(0.003136)  |
| 7:17911038   | rs10282707 | SNX13   | T  | C   | 0.4261       | -0.0270623<br>(0.003077) | -0.0136602<br>(0.003201) | 0.010686<br>(0.003153)   |
| 11:14852490  | rs1037378  | PDE3B   | A  | G   | 0.5357       | -0.0150186<br>(0.00255)  | -0.0017962<br>(0.002639) | 0.0075654<br>(0.002596)  |
| 19:19407718  | rs10401969 | SUGP1   | C  | T   | 0.08456      | 0.011835<br>(0.004627)   | -0.0895599<br>(0.004764) | -0.10197<br>(0.00469)    |
| 14:65914867  | rs10483776 | FUT8    | G  | A   | 0.1638       | -0.0199895<br>(0.003454) | -0.0018306<br>(0.003576) | 0.01332<br>(0.003515)    |
| 2:118835841  | rs10490626 | NA      | A  | G   | 0.06783      | 0.0035321<br>(0.005241)  | -0.0534095<br>(0.005458) | -0.0106896<br>(0.005369) |
| 2:101627925  | rs1062062  | TBC1D8  | T  | C   | 0.1234       | 0.002406<br>(0.004069)   | -0.02069<br>(0.004216)   | -0.004538<br>(0.004152)  |
| 10:65027610  | rs10761731 | JMJD1C  | T  | A   | 0.4199       | 0.0129375<br>(0.002597)  | 0.01674<br>(0.002687)    | -0.02735<br>(0.002639)   |
| 1:23766233   | rs1077514  | ASAP3   | T  | C   | 0.8219       | 0.009854<br>(0.003426)   | 0.0149723<br>(0.003536)  | 0.0193845<br>(0.003478)  |
| 12:107174646 | rs10861661 | RIC8B   | C  | A   | 0.2332       | -0.01689<br>(0.003127)   | 0.0008568<br>(0.00323)   | 0.01893<br>(0.003182)    |

|              |            |          |   |   |        |                          |                          |                          |
|--------------|------------|----------|---|---|--------|--------------------------|--------------------------|--------------------------|
| 16:31048079  | rs10871454 | STX4     | T | C | 0.369  | 0.0078753<br>(0.00282)   | -0.0100139<br>(0.002924) | -0.007933<br>(0.002874)  |
| 10:118397971 | rs10885997 | PNLIPRP2 | G | A | 0.4093 | -0.008117<br>(0.002801)  | 0.0154428<br>(0.002888)  | 0.0017389<br>(0.002858)  |
| 10:17260290  | rs10904908 | NA       | G | A | 0.4456 | 0.0117<br>(0.002568)     | 0.011618<br>(0.002658)   | 0.007283<br>(0.002614)   |
| 9:28414339   | rs10968576 | LINGO2   | G | A | 0.2891 | -0.0168862<br>(0.002813) | -0.0008863<br>(0.002918) | 0.009558<br>(0.00287)    |
| 12:112072424 | rs11065987 | NA       | G | A | 0.3804 | -0.023166<br>(0.002825)  | -0.02598<br>(0.002932)   | 0.008401<br>(0.002881)   |
| 12:57809456  | rs1106766  | NA       | T | C | 0.2121 | 0.03155<br>(0.003136)    | -0.01311<br>(0.003249)   | -0.029714<br>(0.003196)  |
| 17:29629326  | rs11080150 | NF1      | G | A | 0.3257 | -0.0023235<br>(0.002727) | -0.0188852<br>(0.002822) | -0.002523<br>(0.002777)  |
| 8:145043543  | rs11136341 | PLEC     | G | A | 0.3768 | 0.0005391<br>(0.003399)  | 0.0256472<br>(0.003484)  | 0.0027801<br>(0.003413)  |
| 16:53809247  | rs1121980  | FTO      | A | G | 0.4278 | -0.02014<br>(0.002596)   | 0.0040968<br>(0.002687)  | 0.01763<br>(0.002636)    |
| 11:126243952 | rs11220462 | ST3GAL4  | A | G | 0.1453 | -0.02103<br>(0.004439)   | 0.0427348<br>(0.004526)  | 0.0056989<br>(0.004456)  |
| 2:272203     | rs11553746 | ACP1     | T | C | 0.3288 | 0.0149362<br>(0.002735)  | 0.003969<br>(0.002834)   | -0.012282<br>(0.002785)  |
| 11:118486067 | rs11603023 | PHLDB1   | C | T | 0.5788 | -0.008335<br>(0.002583)  | -0.009488<br>(0.002676)  | 0.0024682<br>(0.00263)   |
| 12:121416650 | rs1169288  | HNF1A    | C | A | 0.3325 | 0.014331<br>(0.002836)   | 0.036604<br>(0.002945)   | 0.0022536<br>(0.002886)  |
| 2:203532304  | rs11694172 | FAM117B  | G | A | 0.1548 | -0.0040928<br>(0.045714) | -0.0254615<br>(0.045714) | 0.0106824<br>(0.045714)  |
| 3:123065778  | rs11708067 | ADCY5    | G | A | 0.2068 | -0.0153031<br>(0.00321)  | -0.0097741<br>(0.003322) | -0.0011403<br>(0.003272) |
| 8:10683929   | rs11776767 | PINX1    | C | G | 0.3719 | -0.01077<br>(0.002781)   | -0.0058878<br>(0.002849) | 0.0221<br>(0.002801)     |
| 17:37813856  | rs11869286 | STARD3   | C | G | 0.6304 | 0.0303<br>(0.002819)     | 0.0029173<br>(0.002914)  | -0.002546<br>(0.002867)  |
| 17:45732774  | rs11871606 | KPNB1    | A | C | 0.5019 | -0.0134882<br>(0.00256)  | -0.0271453<br>(0.002649) | 0.0161314<br>(0.002604)  |
| 1:25775733   | rs12027135 | TMEM57   | T | A | 0.5089 | 0.004503<br>(0.002572)   | 0.0272454<br>(0.002663)  | 0.0079157<br>(0.002616)  |
| 6:153431125  | rs12055786 | RGS17    | T | C | 0.4369 | -0.020698<br>(0.002905)  | -0.0023762<br>(0.003009) | 0.01238<br>(0.00297)     |

|             |             |          |   |   |         |                          |                          |                          |
|-------------|-------------|----------|---|---|---------|--------------------------|--------------------------|--------------------------|
| 1:156700651 | rs12145743  | RRNAD1   | G | T | 0.3121  | 0.0172277<br>(0.003003)  | -0.0016557<br>(0.003117) | -0.01131<br>(0.003064)   |
| 2:165540800 | rs12328675  | NA       | C | T | 0.1197  | 0.050015<br>(0.003922)   | -0.0036588<br>(0.00406)  | -0.044954<br>(0.003989)  |
| 2:27730940  | rs1260326   | GCKR     | C | T | 0.6287  | 0.0057906<br>(0.002682)  | -0.02315<br>(0.002778)   | -0.1205172<br>(0.002726) |
| 7:21607352  | rs12670798  | DNAH11   | C | T | 0.2471  | 0.0014672<br>(0.003057)  | 0.0327999<br>(0.003164)  | 0.0132<br>(0.003117)     |
| 8:19844222  | rs12678919  | NA       | G | A | 0.09741 | 0.1586<br>(0.00433)      | 0.0123<br>(0.004464)     | -0.1778<br>(0.004392)    |
| 1:27138393  | rs12748152  | NA       | T | C | 0.07209 | -0.0434434<br>(0.004945) | 0.0306381<br>(0.005127)  | 0.03061<br>(0.005037)    |
| 11:65391317 | rs12801636  | PCNXL3   | A | G | 0.2339  | 0.0118095<br>(0.003019)  | 0.007643<br>(0.003119)   | -0.0178955<br>(0.003069) |
| 4:103188709 | rs13107325  | SLC39A8  | T | C | 0.05057 | -0.0737205<br>(0.005813) | -0.0345177<br>(0.006053) | 0.0337072<br>(0.005956)  |
| 4:89740128  | rs13133548  | FAM13A   | A | G | 0.4835  | -0.01706<br>(0.002545)   | 0.003702<br>(0.002635)   | 0.0139241<br>(0.002589)  |
| 4:187120211 | rs13146272  | CYP4V2   | A | C | 0.6231  | 0.003435<br>(0.002632)   | -0.01453<br>(0.002723)   | 0.0004329<br>(0.002677)  |
| 3:58381287  | rs13315871  | PXK      | A | G | 0.08472 | -0.0039354<br>(0.004727) | -0.0383928<br>(0.004888) | -0.0025494<br>(0.004812) |
| 3:52532118  | rs13326165  | STAB1    | G | A | 0.8052  | -0.0246185<br>(0.00324)  | 0.0032941<br>(0.003352)  | 0.0201542<br>(0.003296)  |
| 14:74250126 | rs13379043  | C14orf43 | C | T | 0.3053  | 0.017107<br>(0.002858)   | -0.0177218<br>(0.002961) | -0.0086105<br>(0.002908) |
| 2:21263900  | rs1367117   | APOB     | A | G | 0.2844  | -0.01966<br>(0.00285)    | 0.1053<br>(0.002954)     | 0.0230221<br>(0.002905)  |
| 13:45970147 | rs138358301 | SLC25A30 | G | A | 0.00347 | -0.01942<br>(0.021211)   | 0.0007869<br>(0.022398)  | 0.146163<br>(0.021899)   |
| 22:35711098 | rs138777    | TOM1     | G | A | 0.6172  | -0.0025528<br>(0.002782) | -0.01544<br>(0.002878)   | -0.0076594<br>(0.002834) |
| 3:48229366  | rs146179438 | CDC25A   | A | C | 0.01984 | -0.0633901<br>(0.009526) | -0.007085<br>(0.010004)  | -0.0041718<br>(0.009853) |
| 16:88580796 | rs147032017 | ZFPM1    | T | C | 0.00649 | -0.0404114<br>(0.016517) | -0.0906348<br>(0.016925) | 0.0115662<br>(0.016595)  |
| 8:18272881  | rs1495741   | NA       | A | G | 0.7527  | -0.0038341<br>(0.002986) | -0.021635<br>(0.003089)  | -0.035042<br>(0.003036)  |
| 15:58683366 | rs1532085   | NA       | G | A | 0.5907  | -0.095557<br>(0.0026)    | 0.000173<br>(0.00269)    | -0.0311351<br>(0.002642) |



|              |            |          |   |   |         |                          |                          |                          |
|--------------|------------|----------|---|---|---------|--------------------------|--------------------------|--------------------------|
| 6:160578860  | rs1564348  | SLC22A1  | C | T | 0.1517  | -0.0028173<br>(0.00353)  | 0.0474749<br>(0.003664)  | 0.020006<br>(0.003601)   |
| 1:182168885  | rs1689800  | NA       | G | A | 0.3391  | -0.0246067<br>(0.00269)  | 0.0129118<br>(0.002784)  | 0.0082725<br>(0.002738)  |
| 11:2936952   | rs16928809 | SLC22A18 | A | G | 0.08745 | -0.02877<br>(0.004529)   | -0.008583<br>(0.004698)  | -0.0008769<br>(0.004617) |
| 16:67928042  | rs16942887 | PSKH1    | A | G | 0.1336  | 0.0800568<br>(0.003919)  | 0.0012499<br>(0.004045)  | -0.0157845<br>(0.003979) |
| 7:72982874   | rs17145738 | NA       | T | C | 0.1149  | 0.0425198<br>(0.004038)  | 0.0138548<br>(0.00418)   | -0.1233097<br>(0.004121) |
| 7:150529449  | rs17173637 | NA       | C | T | 0.1449  | 0.0342042<br>(0.046854)  | 0.0457748<br>(0.046854)  | 0.0456027<br>(0.046854)  |
| 2:54482553   | rs17189743 | TSPYL6   | A | G | 0.02832 | 0.0396507<br>(0.007634)  | 0.01822<br>(0.007927)    | -0.03373<br>(0.007809)   |
| 3:132163200  | rs17404153 | DNAJC13  | T | G | 0.1261  | 0.0030597<br>(0.003937)  | -0.0182777<br>(0.004074) | -0.0035421<br>(0.004009) |
| 11:61569830  | rs174546   | FADS1    | T | C | 0.3121  | -0.041822<br>(0.002804)  | -0.053337<br>(0.002909)  | 0.052141<br>(0.002855)   |
| 19:52324216  | rs17695224 | FPR3     | A | G | 0.2508  | -0.0278325<br>(0.002939) | -0.001773<br>(0.003043)  | 0.007519<br>(0.002989)   |
| 18:57851097  | rs17782313 | NA       | C | T | 0.2441  | -0.0187114<br>(0.002984) | 0.002343<br>(0.003084)   | 0.01395<br>(0.003029)    |
| 6:26093141   | rs1800562  | HFE      | A | G | 0.0479  | 0.007024<br>(0.006024)   | -0.0441364<br>(0.006308) | 0.0080621<br>(0.006213)  |
| 20:43042364  | rs1800961  | HNF4A    | T | C | 0.03085 | -0.1396719<br>(0.007304) | -0.05428<br>(0.007587)   | 0.0042999<br>(0.007452)  |
| 1:161479745  | rs1801274  | FCGR2A   | G | A | 0.4842  | -0.008375<br>(0.003521)  | -0.0079908<br>(0.003603) | -0.0004092<br>(0.003542) |
| 17:64210580  | rs1801689  | APOH     | C | A | 0.02673 | -0.01933<br>(0.007901)   | 0.1045<br>(0.008176)     | -0.0472513<br>(0.008026) |
| 22:21932068  | rs181362   | UBE2L3   | T | C | 0.254   | -0.0281524<br>(0.002979) | -0.007346<br>(0.003075)  | -0.0127076<br>(0.003021) |
| 10:5254847   | rs1832007  | AKR1C4   | G | A | 0.1381  | -0.0088966<br>(0.003745) | -0.0056006<br>(0.003874) | -0.0181171<br>(0.003812) |
| 9:107664301  | rs1883025  | ABCA1    | T | C | 0.2623  | -0.066873<br>(0.002891)  | -0.02412<br>(0.002991)   | -0.02179<br>(0.002938)   |
| 10:124610027 | rs1891110  | FAM24B   | A | G | 0.5487  | 0.004137<br>(0.002556)   | 0.0205575<br>(0.002645)  | 0.003129<br>(0.002599)   |
| 7:1083777    | rs1997243  | C7orf50  | G | A | 0.1426  | 0.0258637<br>(0.003649)  | 0.01803<br>(0.00378)     | 0.008166<br>(0.003711)   |

|              |             |          |   |   |         |                          |                          |                          |
|--------------|-------------|----------|---|---|---------|--------------------------|--------------------------|--------------------------|
| 16:72108093  | rs2000999   | HPR      | A | G | 0.2003  | -0.007048<br>(0.003415)  | 0.063026<br>(0.003535)   | 0.0213489<br>(0.003471)  |
| 6:27835293   | rs201148465 | HIST1H1B | C | A | 0.00138 | 0.0211363<br>(0.036292)  | 0.2098<br>(0.037634)     | 0.0354906<br>(0.036349)  |
| 19:42584958  | rs201596848 | ZNF574   | T | C | 0.00136 | 0.0902935<br>(0.034589)  | -0.2553608<br>(0.036965) | -0.0434062<br>(0.03668)  |
| 2:121309488  | rs2030746   | NA       | T | C | 0.4127  | -0.001354<br>(0.002575)  | 0.01389<br>(0.002665)    | 0.00458<br>(0.00262)     |
| 10:94839642  | rs2068888   | NA       | A | G | 0.4701  | 0.0227842<br>(0.002581)  | -0.0163534<br>(0.002673) | -0.03199<br>(0.002628)   |
| 17:1648502   | rs2070863   | SERPINF2 | T | C | 0.2128  | 0.005799<br>(0.003236)   | 0.0094815<br>(0.003355)  | 0.01398<br>(0.003302)    |
| 17:40257163  | rs2074158   | DHX58    | C | T | 0.1867  | -0.0201864<br>(0.003784) | 0.0008413<br>(0.003924)  | -0.0027224<br>(0.003857) |
| 22:41170063  | rs2076674   | SLC25A17 | C | T | 0.3538  | 0.0018701<br>(0.002738)  | 0.0183521<br>(0.002824)  | -0.002037<br>(0.002783)  |
| 8:59388565   | rs2081687   | NA       | C | T | 0.6624  | -0.0026322<br>(0.002694) | -0.0276358<br>(0.002789) | -0.0185804<br>(0.002743) |
| 17:73782191  | rs2125345   | UNK      | C | T | 0.3126  | 0.0075<br>(0.002878)     | -0.0242084<br>(0.002982) | -0.0112256<br>(0.002926) |
| 1:63025942   | rs2131925   | DOCK7    | T | G | 0.6477  | 0.0104456<br>(0.002711)  | 0.0444791<br>(0.002805)  | 0.073941<br>(0.002757)   |
| 6:52453220   | rs2239619   | NA       | A | C | 0.619   | 0.00002456<br>(0.00271)  | 0.0180313<br>(0.002769)  | 0.0009792<br>(0.002728)  |
| 6:31265490   | rs2247056   | NA       | C | T | 0.765   | 0.0131603<br>(0.003394)  | 0.016079<br>(0.003538)   | 0.0250569<br>(0.003486)  |
| 10:113933886 | rs2255141   | GPAM     | G | A | 0.7281  | -0.0267435<br>(0.00288)  | -0.02792<br>(0.002982)   | 0.0191947<br>(0.00293)   |
| 9:117166246  | rs2274159   | DFNB31   | G | A | 0.48    | 0.01063<br>(0.002578)    | 0.0090078<br>(0.002666)  | 0.0024206<br>(0.002622)  |
| 2:169830155  | rs2287623   | ABCB11   | A | G | 0.5921  | -0.00597<br>(0.002606)   | -0.0208912<br>(0.002699) | -0.0080046<br>(0.002653) |
| 3:12628920   | rs2290159   | RAF1     | C | G | 0.204   | -0.009257<br>(0.003744)  | -0.0212431<br>(0.003893) | -0.0110358<br>(0.003843) |
| 8:116599199  | rs2293889   | TRPS1    | G | T | 0.6204  | 0.02887<br>(0.002653)    | -0.0149623<br>(0.00275)  | -0.00414<br>(0.002704)   |
| 19:47589895  | rs2303108   | ZC3H4    | C | T | 0.6653  | -0.0149234<br>(0.002752) | 0.006731<br>(0.002847)   | 0.0111868<br>(0.002797)  |
| 3:47045846   | rs2305637   | NBEAL2   | T | C | 0.1581  | -0.0323517<br>(0.004252) | 0.0020226<br>(0.004463)  | 0.01566<br>(0.00439)     |

|              |            |              |   |   |         |                          |                          |                          |
|--------------|------------|--------------|---|---|---------|--------------------------|--------------------------|--------------------------|
| 20:17845921  | rs2328223  | NA           | C | A | 0.2244  | -0.04991<br>(0.039171)   | 0.1405<br>(0.039171)     | 0.06753<br>(0.039171)    |
| 15:42683787  | rs2412710  | CAPN3        | A | G | 0.0214  | -0.04835<br>(0.008873)   | 0.002442<br>(0.009113)   | 0.0674914<br>(0.008956)  |
| 1:55504650   | rs2479409  | NA           | A | G | 0.6582  | 0.009488<br>(0.002691)   | -0.0466149<br>(0.002786) | -0.002045<br>(0.002739)  |
| 5:131008194  | rs26008    | FNIP1        | C | T | 0.9195  | 0.01586<br>(0.004683)    | 0.002729<br>(0.00484)    | -0.0277664<br>(0.004758) |
| 4:100014805  | rs2602836  | LOC100507053 | G | A | 0.5796  | -0.01377<br>(0.002693)   | 0.003104<br>(0.002781)   | 0.01266<br>(0.002743)    |
| 3:11400249   | rs2606736  | ATG7         | T | C | 0.599   | -0.0009657<br>(0.002602) | -0.003689<br>(0.002692)  | 0.004378<br>(0.002647)   |
| 1:220970028  | rs2642438  | MOSC1        | G | A | 0.7619  | 0.0268468<br>(0.007873)  | 0.02622<br>(0.00793)     | -0.0149747<br>(0.007837) |
| 1:150958836  | rs267733   | ANXA9        | G | A | 0.1366  | 0.021253<br>(0.003721)   | -0.0253057<br>(0.003861) | -0.0053787<br>(0.003794) |
| 6:127452935  | rs2745353  | RSPO3        | T | C | 0.5253  | -0.0231161<br>(0.002547) | 0.0030394<br>(0.002636)  | 0.0204077<br>(0.00259)   |
| 6:39246856   | rs2758873  | NA           | A | G | 0.23776 | 0.045981<br>(0.03972)    | 0.0738191<br>(0.03972)   | -0.039629<br>(0.03972)   |
| 1:219687432  | rs2785990  | NA           | T | C | 0.6852  | -0.014979<br>(0.002757)  | 0.0095037<br>(0.002856)  | 0.015985<br>(0.002807)   |
| 6:34546560   | rs2814982  | NA           | T | C | 0.1196  | -0.0283878<br>(0.003972) | -0.0167865<br>(0.004097) | -0.0015943<br>(0.004032) |
| 10:101912064 | rs2862954  | ERLIN1       | C | T | 0.405   | 0.01617<br>(0.002691)    | 0.0096841<br>(0.002789)  | 0.0063832<br>(0.00274)   |
| 14:94844947  | rs28929474 | SERPINA1     | T | C | 0.01536 | -0.01708<br>(0.010353)   | 0.08124<br>(0.010758)    | 0.02096<br>(0.010605)    |
| 5:176637576  | rs28932178 | NSD1         | C | T | 0.1679  | 0.0200863<br>(0.003483)  | -0.008877<br>(0.003608)  | -0.01664<br>(0.003549)   |
| 11:10388782  | rs2923084  | NA           | G | A | 0.2006  | -0.011837<br>(0.003249)  | 0.007712<br>(0.003356)   | 0.0073356<br>(0.003302)  |
| 16:81534790  | rs2925979  | CMIP         | C | T | 0.698   | 0.04125<br>(0.002759)    | -0.002986<br>(0.002856)  | -0.0287751<br>(0.002809) |
| 15:44245931  | rs2929282  | FRMD5        | T | A | 0.06708 | -0.0313856<br>(0.005391) | 0.0009448<br>(0.005531)  | 0.0447793<br>(0.005446)  |
| 8:126490972  | rs2954029  | NA           | T | A | 0.4468  | 0.03518<br>(0.002564)    | -0.04761<br>(0.002653)   | -0.07966<br>(0.002608)   |
| 2:227100698  | rs2972146  | NA           | T | G | 0.67    | -0.0359841<br>(0.0028)   | 0.0052182<br>(0.002901)  | 0.0328407<br>(0.002852)  |

|             |            |         |   |   |         |                           |                          |                          |
|-------------|------------|---------|---|---|---------|---------------------------|--------------------------|--------------------------|
| 11:46743247 | rs3136441  | F2      | C | T | 0.1514  | 0.03992<br>(0.003853)     | 0.0052327<br>(0.003993)  | -0.02355<br>(0.003938)   |
| 17:7091650  | rs314253   | NA      | C | T | 0.3507  | -0.00008706<br>(0.002659) | -0.01959<br>(0.002753)   | -0.0055727<br>(0.002708) |
| 6:32412435  | rs3177928  | HLA-DRA | A | G | 0.1409  | -0.0004877<br>(0.004126)  | 0.03496<br>(0.00418)     | 0.01447<br>(0.004229)    |
| 16:15129940 | rs3198697  | PDXDC1  | T | C | 0.3988  | -0.0010988<br>(0.034098)  | -0.02055<br>(0.034098)   | 0.0201741<br>(0.034098)  |
| 1:214159256 | rs340874   | NA      | C | T | 0.5061  | -0.0035915<br>(0.002579)  | 0.0059034<br>(0.002671)  | 0.0064489<br>(0.002626)  |
| 11:64031241 | rs35169799 | PLCB3   | T | C | 0.05893 | -0.03914<br>(0.005394)    | 0.005833<br>(0.005616)   | 0.0384757<br>(0.005517)  |
| 5:176520243 | rs351855   | FGFR4   | A | G | 0.292   | 0.01002<br>(0.003167)     | -0.01803<br>(0.003282)   | -0.008172<br>(0.003238)  |
| 22:17625915 | rs35665085 | CECR5   | A | G | 0.04979 | 0.003913<br>(0.005826)    | 0.0091775<br>(0.006052)  | 0.03241<br>(0.005946)    |
| 20:12962718 | rs364585   | NA      | G | A | 0.6361  | 0.0072151<br>(0.002743)   | 0.0187598<br>(0.00284)   | -0.01223<br>(0.002797)   |
| 6:16127407  | rs3757354  | NA      | T | C | 0.24403 | 0.003124<br>(0.002971)    | -0.033431<br>(0.003072)  | -0.002962<br>(0.00302)   |
| 16:56993324 | rs3764261  | NA      | A | C | 0.3127  | 0.238777<br>(0.002775)    | -0.032443<br>(0.002874)  | -0.0356036<br>(0.002823) |
| 2:202122995 | rs3769823  | CASP8   | G | A | 0.6897  | -0.0027072<br>(0.002782)  | 0.001299<br>(0.002881)   | 0.0171776<br>(0.002834)  |
| 9:2640759   | rs3780181  | VLDLR   | G | A | 0.07446 | -0.0005274<br>(0.004855)  | -0.0369647<br>(0.00502)  | 0.006014<br>(0.004942)   |
| 15:40751555 | rs3803357  | BAHD1   | A | C | 0.5429  | 0.0099063<br>(0.002593)   | 0.0004181<br>(0.002685)  | -0.0169786<br>(0.002637) |
| 9:139368953 | rs3812594  | SEC16A  | A | G | 0.2375  | 0.004415<br>(0.003033)    | -0.0178008<br>(0.003146) | 0.0064862<br>(0.003089)  |
| 5:74655726  | rs3846663  | HMGCR   | T | C | 0.3977  | 0.006229<br>(0.002656)    | 0.0656162<br>(0.002748)  | 0.002202<br>(0.002704)   |
| 19:54792761 | rs386000   | NA      | C | G | 0.2189  | 0.05397<br>(0.003991)     | -0.0002399<br>(0.004104) | -0.0081628<br>(0.004037) |
| 7:116358044 | rs38855    | MET     | G | A | 0.4624  | 0.0100202<br>(0.002564)   | -0.003534<br>(0.002655)  | -0.01422<br>(0.00261)    |
| 9:16887366  | rs3927680  | NA      | A | T | 0.5178  | 0.01<br>(0.002654)        | -0.0131538<br>(0.002747) | -0.01811<br>(0.002701)   |
| 8:11702375  | rs3947     | CTSB    | A | G | 0.2313  | 0.003957<br>(0.00331)     | -0.0016426<br>(0.003425) | 0.02412<br>(0.003383)    |

|              |            |                           |   |   |         |                           |                          |                          |
|--------------|------------|---------------------------|---|---|---------|---------------------------|--------------------------|--------------------------|
| 10:52573772  | rs41274050 | A1CF                      | T | C | 0.00715 | -0.037601<br>(0.015145)   | 0.0570591<br>(0.015688)  | 0.1016376<br>(0.015382)  |
| 17:76403984  | rs4129767  | PGS1                      | A | G | 0.4879  | 0.0263751<br>(0.00255)    | 0.0165082<br>(0.002641)  | -0.01669<br>(0.002595)   |
| 20:56140439  | rs41302559 | PCK1                      | A | G | 0.00206 | 0.0582471<br>(0.028098)   | -0.0067475<br>(0.029184) | -0.1536386<br>(0.028705) |
| 22:46627603  | rs4253772  | PPARA                     | T | C | 0.09758 | 0.00477<br>(0.004516)     | 0.018203<br>(0.004683)   | 0.017872<br>(0.004591)   |
| 2:44072576   | rs4299376  | ABCG8                     | T | G | 0.7127  | 0.0041769<br>(0.003084)   | -0.070306<br>(0.003209)  | -0.017339<br>(0.003152)  |
| 19:45422946  | rs4420638  | NA                        | G | A | 0.1797  | -0.0802618<br>(0.004055)  | 0.168016<br>(0.004176)   | 0.055937<br>(0.004099)   |
| 4:88030261   | rs442177   | AFF1                      | T | G | 0.5731  | -0.018336<br>(0.002586)   | 0.008547<br>(0.002674)   | 0.03051<br>(0.00263)     |
| 5:122855416  | rs4530754  | CSNK1G3                   | A | G | 0.5536  | 0.0053378<br>(0.002677)   | 0.0169497<br>(0.002771)  | -0.0029241<br>(0.002731) |
| 1:178515312  | rs4650994  | C1orf220                  | A | G | 0.4916  | -0.0191952<br>(0.002588)  | 0.002208<br>(0.002681)   | 0.00922<br>(0.002639)    |
| 1:40028180   | rs4660293  | PABPC4                    | G | A | 0.208   | -0.0398414<br>(0.003183)  | 0.0009698<br>(0.003299)  | 0.02428<br>(0.003242)    |
| 7:25991826   | rs4722551  | NA                        | C | T | 0.1577  | 0.007327<br>(0.003626)    | 0.0399107<br>(0.003754)  | -0.02558<br>(0.003695)   |
| 7:130433384  | rs4731702  | NA                        | T | C | 0.4596  | 0.033021<br>(0.00265)     | -0.006628<br>(0.002745)  | -0.027084<br>(0.002701)  |
| 1:155106227  | rs4745     | EFNA1                     | T | A | 0.4876  | 0.0032689<br>(0.002627)   | -0.0148197<br>(0.00272)  | -0.001692<br>(0.002671)  |
| 12:123796238 | rs4759375  | SBNO1                     | T | C | 0.1087  | 0.0505695<br>(0.005331)   | 0.0103686<br>(0.005479)  | -0.002611<br>(0.005369)  |
| 12:124460167 | rs4765127  | ZNF664 ZNF664-<br>FAM101A | T | G | 0.3294  | 0.032852<br>(0.003909)    | -0.005202<br>(0.004011)  | -0.023558<br>(0.003942)  |
| 20:62349586  | rs4809330  | ZGPAT                     | G | A | 0.7005  | -0.0089263<br>(0.002817)  | -0.0152932<br>(0.002919) | 0.0036754<br>(0.002868)  |
| 1:230295691  | rs4846914  | GALNT2                    | A | G | 0.5506  | 0.04942<br>(0.002735)     | 0.0001637<br>(0.002833)  | -0.03941<br>(0.002786)   |
| 6:151901409  | rs4870044  | C6orf97                   | T | C | 0.3408  | -0.00007253<br>(0.002881) | 0.0143991<br>(0.002982)  | 0.006217<br>(0.002935)   |
| 8:121868551  | rs4871137  | NA                        | T | G | 0.6404  | -0.02223<br>(0.002771)    | -0.001985<br>(0.002862)  | 0.0009341<br>(0.002819)  |
| 12:9082581   | rs4883201  | PHC1                      | G | A | 0.115   | -0.03036<br>(0.004016)    | -0.02204<br>(0.004161)   | 0.001646<br>(0.004088)   |

|              |            |         |   |   |         |                          |                          |                          |
|--------------|------------|---------|---|---|---------|--------------------------|--------------------------|--------------------------|
| 7:50305863   | rs4917014  | NA      | G | T | 0.2985  | 0.0167219<br>(0.002789)  | -0.001572<br>(0.002889)  | -0.0011562<br>(0.002839) |
| 19:49206417  | rs492602   | FUT2    | G | A | 0.4502  | -0.007407<br>(0.002735)  | 0.028327<br>(0.002831)   | 0.017758<br>(0.002785)   |
| 13:32953388  | rs4942486  | BRCA2   | C | T | 0.5158  | 0.009385<br>(0.002562)   | -0.0215512<br>(0.002653) | -0.0085198<br>(0.002609) |
| 5:67714246   | rs4976033  | NA      | G | A | 0.4248  | -0.0146967<br>(0.002584) | 0.002944<br>(0.002674)   | 0.017692<br>(0.002629)   |
| 14:105277209 | rs4983559  | NA      | A | G | 0.5689  | -0.0266641<br>(0.0026)   | -0.002315<br>(0.002693)  | 0.007131<br>(0.002646)   |
| 11:75455021  | rs499974   | NA      | A | C | 0.184   | -0.02622<br>(0.003336)   | -0.002109<br>(0.003449)  | -0.0089446<br>(0.003394) |
| 22:38546033  | rs5756931  | PLA2G6  | C | T | 0.3691  | 0.01705<br>(0.002814)    | -0.0019876<br>(0.002905) | -0.01991<br>(0.002854)   |
| 22:30378703  | rs5763662  | MTMR3   | T | C | 0.03132 | 0.018<br>(0.00789)       | 0.0254959<br>(0.008161)  | -0.006218<br>(0.008032)  |
| 9:15305378   | rs581080   | TTC39B  | C | G | 0.7968  | 0.0373235<br>(0.003236)  | 0.0068168<br>(0.003349)  | 0.0158356<br>(0.003289)  |
| 20:39672618  | rs6029526  | TOP1    | A | T | 0.5095  | 0.0037952<br>(0.002605)  | 0.0352122<br>(0.002696)  | 0.0133591<br>(0.00265)   |
| 6:139829666  | rs605066   | NA      | T | C | 0.5692  | 0.0225756<br>(0.002861)  | -0.004976<br>(0.002963)  | -0.02451<br>(0.002926)   |
| 4:155489608  | rs6054     | FGB     | T | C | 0.0038  | -0.0268535<br>(0.020872) | 0.0910444<br>(0.021773)  | 0.1427<br>(0.02139)      |
| 20:62695931  | rs6062343  | TCEA2   | A | G | 0.4322  | 0.0131208<br>(0.002648)  | -0.0143458<br>(0.002737) | -0.0178037<br>(0.002697) |
| 12:72179446  | rs61754230 | RAB21   | T | C | 0.01507 | -0.0104<br>(0.010402)    | 0.0573498<br>(0.010816)  | -0.002943<br>(0.010608)  |
| 11:68703959  | rs622082   | IGHMBP2 | G | A | 0.3102  | -0.0171778<br>(0.002773) | 0.0003493<br>(0.002873)  | 0.014101<br>(0.002826)   |
| 8:61548494   | rs626913   | NA      | C | A | 0.5191  | 0.0025179<br>(0.002545)  | 0.01188<br>(0.002634)    | 0.009915<br>(0.00259)    |
| 1:109818306  | rs629301   | CELSR2  | T | G | 0.7742  | -0.0418141<br>(0.003055) | 0.1575181<br>(0.003163)  | 0.01383<br>(0.003108)    |
| 9:136155000  | rs635634   | NA      | T | C | 0.1904  | 0.01658<br>(0.003378)    | 0.0773341<br>(0.003486)  | -0.0110848<br>(0.00343)  |
| 5:53298025   | rs6450176  | ARL15   | A | G | 0.2703  | -0.0133145<br>(0.003145) | 0.004588<br>(0.003222)   | 0.0173217<br>(0.003158)  |
| 3:135926622  | rs645040   | NA      | T | G | 0.7818  | -0.0207<br>(0.003094)    | 0.0106915<br>(0.003199)  | 0.02264<br>(0.003147)    |

|              |            |           |   |   |         |                          |                          |                          |
|--------------|------------|-----------|---|---|---------|--------------------------|--------------------------|--------------------------|
| 19:11202306  | rs6511720  | LDLR      | T | G | 0.1075  | 0.0241673<br>(0.004115)  | -0.2114279<br>(0.004257) | -0.0063561<br>(0.004185) |
| 2:113841030  | rs6734238  | NA        | G | A | 0.3909  | -0.0004142<br>(0.002644) | -0.01183<br>(0.002722)   | -0.0103799<br>(0.002678) |
| 9:19376255   | rs67710536 | RPS6      | C | A | 0.1111  | 0.01532<br>(0.004336)    | 0.0282728<br>(0.004458)  | 0.004035<br>(0.004391)   |
| 4:3473139    | rs6831256  | DOK7      | G | A | 0.4412  | -0.007848<br>(0.002587)  | 0.01266<br>(0.002679)    | 0.02101<br>(0.002633)    |
| 5:156390297  | rs6882076  | TIMD4     | C | T | 0.626   | -0.00159<br>(0.002654)   | 0.0390394<br>(0.002746)  | 0.0378331<br>(0.002699)  |
| 7:6449272    | rs702485   | DAGLB     | G | A | 0.4633  | 0.09697<br>(0.033105)    | 0.0078124<br>(0.033105)  | -0.05185<br>(0.033105)   |
| 17:26694861  | rs704      | VTN       | A | G | 0.4864  | -0.0100425<br>(0.002556) | 0.0214349<br>(0.002647)  | -0.0063109<br>(0.002602) |
| 10:115789375 | rs7076938  | NA        | T | C | 0.7253  | 0.0187491<br>(0.002851)  | -0.0009664<br>(0.00295)  | -0.0099861<br>(0.0029)   |
| 12:20473758  | rs7134375  | NA        | A | C | 0.4116  | 0.02065<br>(0.002581)    | 0.0033477<br>(0.002673)  | -0.01362<br>(0.002628)   |
| 12:110000193 | rs7134594  | MMAB      | T | C | 0.5261  | 0.0300993<br>(0.002587)  | 0.005685<br>(0.002678)   | 0.0026108<br>(0.002632)  |
| 12:7691134   | rs7136716  | NA        | G | A | 0.1502  | 0.0207533<br>(0.003647)  | -0.00607<br>(0.003758)   | -0.00787<br>(0.003697)   |
| 14:64235556  | rs7157785  | NA        | T | G | 0.1773  | -0.013265<br>(0.003633)  | 0.01136<br>(0.003761)    | 0.0229178<br>(0.003708)  |
| 18:47160953  | rs7241918  | NA        | T | G | 0.8481  | 0.0774087<br>(0.003563)  | 0.0204613<br>(0.003704)  | 0.006444<br>(0.003641)   |
| 19:7224431   | rs7248104  | INSR      | A | G | 0.403   | 0.01217<br>(0.002589)    | -0.0022646<br>(0.002681) | -0.020203<br>(0.002636)  |
| 19:8433196   | rs7255436  | ANGPTL4   | A | C | 0.5207  | 0.0290316<br>(0.002566)  | 0.0075534<br>(0.002658)  | -0.019297<br>(0.002611)  |
| 20:34116282  | rs7261862  | C20orf173 | C | T | 0.1768  | -0.003868<br>(0.003382)  | -0.023574<br>(0.003492)  | -0.013216<br>(0.003428)  |
| 17:41926126  | rs72836561 | CD300LG   | T | C | 0.02753 | -0.1726104<br>(0.007717) | -0.02729<br>(0.008014)   | 0.1326595<br>(0.007857)  |
| 19:33899065  | rs731839   | PEPD      | A | G | 0.6336  | 0.016818<br>(0.002663)   | 0.001228<br>(0.002756)   | -0.0154903<br>(0.002709) |
| 19:11347493  | rs737337   | DOCK6     | C | T | 0.1197  | -0.0583385<br>(0.004215) | -0.015796<br>(0.004326)  | 0.0020973<br>(0.004264)  |
| 22:44324727  | rs738409   | PNPLA3    | G | C | 0.2313  | -0.01208<br>(0.003037)   | -0.01796<br>(0.003135)   | -0.0181029<br>(0.003084) |

|              |            |          |   |   |         |                          |                          |                          |
|--------------|------------|----------|---|---|---------|--------------------------|--------------------------|--------------------------|
| 13:114527838 | rs7400722  | GAS6     | A | G | 0.4203  | 0.0005495<br>(0.003018)  | 0.0108984<br>(0.003121)  | 0.014688<br>(0.003074)   |
| 11:109995944 | rs746463   | ZC3H12C  | T | C | 0.6892  | -0.01657<br>(0.002847)   | 0.0007307<br>(0.002948)  | 0.0099146<br>(0.002903)  |
| 1:93009438   | rs7515577  | EVI5     | A | C | 0.8166  | 0.0041697<br>(0.003333)  | 0.0302476<br>(0.003455)  | 0.009148<br>(0.003398)   |
| 16:69385641  | rs76116020 | TMED6    | G | A | 0.03279 | -0.0412576<br>(0.00713)  | -0.0130922<br>(0.007433) | 0.004948<br>(0.007304)   |
| 3:49971514   | rs7613875  | NA       | A | C | 0.4941  | -0.0215262<br>(0.002632) | 0.0006262<br>(0.002723)  | 0.0008603<br>(0.002676)  |
| 3:32533010   | rs7640978  | CMTM6    | T | C | 0.09258 | -0.00388<br>(0.004456)   | -0.03311<br>(0.0046)     | -0.003572<br>(0.004527)  |
| 20:44576502  | rs7679     | PCIF1    | C | T | 0.1685  | -0.0561773<br>(0.003411) | 0.0110928<br>(0.003539)  | 0.0534459<br>(0.003476)  |
| 16:4755108   | rs78074706 | ANKS3    | A | G | 0.02152 | -0.0530981<br>(0.008692) | 0.008417<br>(0.009031)   | 0.02707<br>(0.008884)    |
| 10:74637326  | rs7901016  | CCDC109A | C | T | 0.06978 | -0.0219525<br>(0.005542) | -0.0177426<br>(0.005719) | 0.0422921<br>(0.005615)  |
| 11:122522375 | rs7941030  | NA       | C | T | 0.38    | 0.02413<br>(0.002612)    | 0.01445<br>(0.002705)    | -0.0009928<br>(0.00266)  |
| 17:17409560  | rs7946     | PEMT     | T | C | 0.6667  | 0.004621<br>(0.002818)   | -0.00721<br>(0.002916)   | -0.01634<br>(0.002863)   |
| 13:51221618  | rs797486   | NA       | A | C | 0.8709  | -0.0174945<br>(0.00378)  | 0.0043901<br>(0.003906)  | 0.020136<br>(0.003841)   |
| 14:75322794  | rs8014204  | PROX2    | A | G | 0.5702  | 0.0081899<br>(0.002715)  | 0.0121151<br>(0.002813)  | -0.0026616<br>(0.002768) |
| 14:24883887  | rs8017377  | NYNRIN   | A | G | 0.4228  | 0.002696<br>(0.002608)   | 0.02263<br>(0.002705)    | 0.003689<br>(0.002657)   |
| 17:41878166  | rs8077889  | MPP3     | C | A | 0.2017  | -0.0061447<br>(0.003176) | -0.005101<br>(0.003288)  | 0.0138408<br>(0.003232)  |
| 18:56109859  | rs8099014  | NA       | A | C | 0.7115  | 0.0148<br>(0.002835)     | -0.0040945<br>(0.002932) | -0.005893<br>(0.002884)  |
| 12:125261593 | rs838880   | NA       | T | C | 0.6334  | -0.028954<br>(0.002667)  | -0.0014224<br>(0.002762) | -0.00125<br>(0.002714)   |
| 17:8216468   | rs871841   | ARHGEF15 | C | T | 0.5191  | 0.0029362<br>(0.002656)  | 0.0140764<br>(0.002749)  | 0.006962<br>(0.002707)   |
| 19:18304700  | rs874628   | MPV17L2  | G | A | 0.2609  | 0.0005293<br>(0.002914)  | 0.0145906<br>(0.00302)   | 0.0053915<br>(0.00297)   |
| 3:156798732  | rs900399   | NA       | G | A | 0.3824  | 0.01871<br>(0.002628)    | 0.006631<br>(0.002719)   | -0.0141687<br>(0.002672) |



|              |           |           |   |   |        |                          |                          |                          |
|--------------|-----------|-----------|---|---|--------|--------------------------|--------------------------|--------------------------|
| 6:135411228  | rs9376090 | NA        | C | T | 0.2377 | -0.0159672<br>(0.003045) | -0.0251724<br>(0.003155) | -0.002951<br>(0.0031)    |
| 11:116648917 | rs964184  | NA        | C | G | 0.8478 | 0.111711<br>(0.00355)    | -0.036994<br>(0.003689)  | -0.245988<br>(0.003599)  |
| 14:71096344  | rs9646133 | NA        | T | G | 0.3263 | 0.0088582<br>(0.002736)  | -0.0189208<br>(0.002831) | -0.0004319<br>(0.002783) |
| 5:55861786   | rs9686661 | NA        | T | C | 0.1869 | -0.0321721<br>(0.003256) | 0.0094768<br>(0.003374)  | 0.0423425<br>(0.003312)  |
| 10:46013277  | rs970548  | MARCH8    | C | A | 0.2421 | 0.0259897<br>(0.002982)  | 0.0113847<br>(0.003087)  | 0.0025<br>(0.003034)     |
| 4:69343287   | rs976002  | TMPRSS11E | G | A | 0.2259 | 0.0085285<br>(0.003156)  | 0.022859<br>(0.003272)   | 0.0151<br>(0.00322)      |
| 3:185834499  | rs9816226 | NA        | T | A | 0.8257 | 0.0275756<br>(0.00338)   | 0.005662<br>(0.003499)   | 0.0090597<br>(0.003442)  |
| 6:43757896   | rs998584  | NA        | A | C | 0.4824 | -0.025542<br>(0.002652)  | 0.008065<br>(0.002752)   | 0.033737<br>(0.002707)   |
| 8:9183358    | rs9987289 | NA        | G | A | 0.8993 | 0.09982<br>(0.004376)    | 0.0568788<br>(0.004534)  | -0.03261<br>(0.004455)   |

**Supplemental Table V. Single nucleotide variants used for Mendelian randomization analysis of single-nucleotide variants associated with HDL-C levels.** Data are derived from the Global Lipid Genetics Consortium exome array analysis, which has been described previously<sup>1</sup>. Data are reported in standardized effects (standard deviation units) and represent subset of the 57 / 223 single-nucleotide variants described in Supplemental Table IV. Effect allele (EA; positive effect size for HDL-C), non-effect allele (NEA), high-density lipoprotein cholesterol (HDL-C), low-density lipoprotein cholesterol (LDL-C), triglycerides, and standard error (SE).

| rsID       | Gene    | EA / NEA | HDL-C beta (SE) | HDL-C p   | LDL-C beta (SE)  | LDL-C p  | TG beta (SE)     | TG p      |
|------------|---------|----------|-----------------|-----------|------------------|----------|------------------|-----------|
| rs1121980  | FTO     | G / A    | 0.0201 (0.0026) | 8.57E-15  | -0.0041 (0.0027) | 0.127403 | -0.0176 (0.0026) | 2.27E-11  |
| rs11869286 | STARD3  | C / G    | 0.0303 (0.0028) | 5.86E-27  | 0.0029 (0.0029)  | 0.31684  | -0.0025 (0.0029) | 0.37447   |
| rs12145743 | RRNAD1  | G / T    | 0.0172 (0.003)  | 9.67E-09  | -0.0017 (0.0031) | 0.595247 | -0.0113 (0.0031) | 0.000224  |
| rs12328675 | NA      | C / T    | 0.05 (0.0039)   | 3.07E-37  | -0.0037 (0.0041) | 0.367497 | -0.045 (0.004)   | 1.89E-29  |
| rs12678919 | NA      | G / A    | 0.1586 (0.0043) | 9.33E-294 | 0.0123 (0.0045)  | 0.005868 | -0.1778 (0.0044) | 0         |
| rs12748152 | NA      | C / T    | 0.0434 (0.0049) | 1.56E-18  | -0.0306 (0.0051) | 2.29E-09 | -0.0306 (0.005)  | 1.22E-09  |
| rs12801636 | PCNXL3  | A / G    | 0.0118 (0.003)  | 9.17E-05  | 0.0076 (0.0031)  | 0.01429  | -0.0179 (0.0031) | 5.48E-09  |
| rs13107325 | SLC39A8 | C / T    | 0.0737 (0.0058) | 7.38E-37  | 0.0345 (0.0061)  | 1.18E-08 | -0.0337 (0.006)  | 1.52E-08  |
| rs13326165 | STAB1   | A / G    | 0.0246 (0.0032) | 2.97E-14  | -0.0033 (0.0034) | 0.325752 | -0.0202 (0.0033) | 9.69E-10  |
| rs1532085  | NA      | A / G    | 0.0956 (0.0026) | 1.17E-295 | -0.0002 (0.0027) | 0.94872  | 0.0311 (0.0026)  | 4.61E-32  |
| rs1689800  | NA      | A / G    | 0.0246 (0.0027) | 5.90E-20  | -0.0129 (0.0028) | 3.53E-06 | -0.0083 (0.0027) | 0.002518  |
| rs16942887 | PSKH1   | A / G    | 0.0801 (0.0039) | 9.85E-93  | 0.0012 (0.004)   | 0.757343 | -0.0158 (0.004)  | 7.29E-05  |
| rs17145738 | NA      | T / C    | 0.0425 (0.004)  | 6.21E-26  | 0.0139 (0.0042)  | 0.000918 | -0.1233 (0.0041) | 9.43E-197 |
| rs17173637 | NA      | C / T    | 0.0342 (0.0469) | 0.4654    | 0.0458 (0.0469)  | 0.328583 | 0.0456 (0.0469)  | 0.3304    |
| rs17404153 | DNAJC13 | T / G    | 0.0031 (0.0039) | 0.4371    | -0.0183 (0.0041) | 7.26E-06 | -0.0035 (0.004)  | 0.376887  |
| rs174546   | FADS1   | C / T    | 0.0418 (0.0028) | 2.68E-50  | 0.0533 (0.0029)  | 4.31E-75 | -0.0521 (0.0029) | 1.57E-74  |
| rs17695224 | FPR3    | G / A    | 0.0278 (0.0029) | 2.81E-21  | 0.0018 (0.003)   | 0.559998 | -0.0075 (0.003)  | 0.011877  |
| rs1800961  | HNF4A   | C / T    | 0.1397 (0.0073) | 1.64E-81  | 0.0543 (0.0076)  | 8.45E-13 | -0.0043 (0.0075) | 0.563905  |
| rs181362   | UBE2L3  | C / T    | 0.0282 (0.003)  | 3.37E-21  | 0.0073 (0.0031)  | 0.016894 | 0.0127 (0.003)   | 2.59E-05  |
| rs1883025  | ABCA1   | C / T    | 0.0669 (0.0029) | 2.07E-118 | 0.0241 (0.003)   | 7.24E-16 | 0.0218 (0.0029)  | 1.20E-13  |
| rs2293889  | TRPS1   | G / T    | 0.0289 (0.0027) | 1.38E-27  | -0.015 (0.0028)  | 5.29E-08 | -0.0041 (0.0027) | 0.1257    |

|           |                           |       |                 |           |                  |          |                  |           |
|-----------|---------------------------|-------|-----------------|-----------|------------------|----------|------------------|-----------|
| rs2602836 | LOC100507053              | A / G | 0.0138 (0.0027) | 3.18E-07  | -0.0031 (0.0028) | 0.26435  | -0.0127 (0.0027) | 3.93E-06  |
| rs2606736 | ATG7                      | C / T | 0.001 (0.0026)  | 0.710498  | 0.0037 (0.0027)  | 0.170559 | -0.0044 (0.0026) | 0.098214  |
| rs2923084 | NA                        | A / G | 0.0118 (0.0032) | 0.00027   | -0.0077 (0.0034) | 0.02157  | -0.0073 (0.0033) | 0.02631   |
| rs2925979 | CMIP                      | C / T | 0.0413 (0.0028) | 1.52E-50  | -0.003 (0.0029)  | 0.295836 | -0.0288 (0.0028) | 1.24E-24  |
| rs2954029 | NA                        | T / A | 0.0352 (0.0026) | 7.47E-43  | -0.0476 (0.0027) | 5.12E-72 | -0.0797 (0.0026) | 8.29E-205 |
| rs2972146 | NA                        | G / T | 0.036 (0.0028)  | 8.20E-38  | -0.0052 (0.0029) | 0.0721   | -0.0328 (0.0029) | 1.12E-30  |
| rs3136441 | F2                        | C / T | 0.0399 (0.0039) | 3.74E-25  | 0.0052 (0.004)   | 0.19     | -0.0236 (0.0039) | 2.23E-09  |
| rs3764261 | NA                        | A / C | 0.2388 (0.0028) | 0         | -0.0324 (0.0029) | 1.48E-29 | -0.0356 (0.0028) | 1.77E-36  |
| rs386000  | NA                        | C / G | 0.054 (0.004)   | 1.15E-41  | -0.0002 (0.0041) | 0.953382 | -0.0082 (0.004)  | 0.043165  |
| rs4129767 | PGS1                      | A / G | 0.0264 (0.0026) | 4.58E-25  | 0.0165 (0.0026)  | 4.06E-10 | -0.0167 (0.0026) | 1.27E-10  |
| rs4420638 | NA                        | A / G | 0.0803 (0.0041) | 3.49E-87  | -0.168 (0.0042)  | 0        | -0.0559 (0.0041) | 2.14E-42  |
| rs4650994 | C1orf220                  | G / A | 0.0192 (0.0026) | 1.21E-13  | -0.0022 (0.0027) | 0.410138 | -0.0092 (0.0026) | 0.000476  |
| rs4660293 | PABPC4                    | A / G | 0.0398 (0.0032) | 6.07E-36  | -0.001 (0.0033)  | 0.768806 | -0.0243 (0.0032) | 6.87E-14  |
| rs4731702 | NA                        | T / C | 0.033 (0.0027)  | 1.22E-35  | -0.0066 (0.0027) | 0.01576  | -0.0271 (0.0027) | 1.14E-23  |
| rs4759375 | SBNO1                     | T / C | 0.0506 (0.0053) | 2.42E-21  | 0.0104 (0.0055)  | 0.058425 | -0.0026 (0.0054) | 0.626747  |
| rs4765127 | ZNF664 ZNF664<br>-FAM101A | T / G | 0.0329 (0.0039) | 4.32E-17  | -0.0052 (0.004)  | 0.194711 | -0.0236 (0.0039) | 2.29E-09  |
| rs4846914 | GALNT2                    | A / G | 0.0494 (0.0027) | 5.69E-73  | 0.0002 (0.0028)  | 0.953917 | -0.0394 (0.0028) | 1.98E-45  |
| rs4917014 | NA                        | G / T | 0.0167 (0.0028) | 2.02E-09  | -0.0016 (0.0029) | 0.586211 | -0.0012 (0.0028) | 0.6839    |
| rs4983559 | NA                        | G / A | 0.0267 (0.0026) | 1.11E-24  | 0.0023 (0.0027)  | 0.389941 | -0.0071 (0.0026) | 0.007032  |
| rs499974  | NA                        | C / A | 0.0262 (0.0033) | 3.85E-15  | 0.0021 (0.0034)  | 0.54099  | 0.0089 (0.0034)  | 0.008398  |
| rs581080  | TTC39B                    | C / G | 0.0373 (0.0032) | 8.94E-31  | 0.0068 (0.0033)  | 0.041783 | 0.0158 (0.0033)  | 1.47E-06  |
| rs605066  | NA                        | T / C | 0.0226 (0.0029) | 3.00E-15  | -0.005 (0.003)   | 0.0931   | -0.0245 (0.0029) | 5.44E-17  |
| rs6450176 | ARL15                     | G / A | 0.0133 (0.0031) | 2.30E-05  | -0.0046 (0.0032) | 0.154466 | -0.0173 (0.0032) | 4.13E-08  |
| rs702485  | DAGLB                     | G / A | 0.097 (0.0331)  | 0.003399  | 0.0078 (0.0331)  | 0.81344  | -0.0519 (0.0331) | 0.117314  |
| rs7134375 | NA                        | A / C | 0.0207 (0.0026) | 1.26E-15  | 0.0033 (0.0027)  | 0.210356 | -0.0136 (0.0026) | 2.18E-07  |
| rs7134594 | MMAB                      | T / C | 0.0301 (0.0026) | 2.74E-31  | 0.0057 (0.0027)  | 0.03377  | 0.0026 (0.0026)  | 0.321222  |
| rs7241918 | NA                        | T / G | 0.0774 (0.0036) | 1.16E-104 | 0.0205 (0.0037)  | 3.32E-08 | 0.0064 (0.0036)  | 0.07676   |
| rs7255436 | ANGPTL4                   | A / C | 0.029 (0.0026)  | 1.14E-29  | 0.0076 (0.0027)  | 0.004483 | -0.0193 (0.0026) | 1.45E-13  |
| rs731839  | PEPD                      | A / G | 0.0168 (0.0027) | 2.70E-10  | 0.0012 (0.0028)  | 0.6559   | -0.0155 (0.0027) | 1.08E-08  |
| rs737337  | DOCK6                     | T / C | 0.0583 (0.0042) | 1.42E-43  | 0.0158 (0.0043)  | 0.000261 | -0.0021 (0.0043) | 0.6229    |
| rs7941030 | NA                        | C / T | 0.0241 (0.0026) | 2.52E-20  | 0.0145 (0.0027)  | 9.20E-08 | -0.001 (0.0027)  | 0.708995  |
| rs838880  | NA                        | C / T | 0.029 (0.0027)  | 1.89E-27  | 0.0014 (0.0028)  | 0.6065   | 0.0013 (0.0027)  | 0.64517   |

|           |        |       |                 |           |                  |          |                  |          |
|-----------|--------|-------|-----------------|-----------|------------------|----------|------------------|----------|
| rs964184  | NA     | C / G | 0.1117 (0.0036) | 2.60E-217 | -0.037 (0.0037)  | 1.13E-23 | -0.246 (0.0036)  | 0        |
| rs970548  | MARCH8 | C / A | 0.026 (0.003)   | 2.86E-18  | 0.0114 (0.0031)  | 0.000226 | 0.0025 (0.003)   | 0.40991  |
| rs998584  | NA     | C / A | 0.0255 (0.0027) | 5.97E-22  | -0.0081 (0.0028) | 0.00339  | -0.0337 (0.0027) | 1.22E-35 |
| rs9987289 | NA     | G / A | 0.0998 (0.0044) | 3.69E-115 | 0.0569 (0.0045)  | 4.28E-36 | -0.0326 (0.0045) | 2.50E-13 |

**Supplemental Table VI. Baseline characteristics of UK Biobank participants with British Caucasian genetic ancestry**

**stratified by quintiles of measured levels of HDL-C.** Body mass index (BMI), hemoglobin A1c (HbA1c), high-density lipoprotein cholesterol (HDL-C), low-density lipoprotein cholesterol (LDL-C).

| <b>Characteristic</b>                | <b>Quintile 1<br/>(n=71,561)</b> | <b>Quintile 2<br/>(n=71,709)</b> | <b>Quintile 3<br/>(n=71,323)</b> | <b>Quintile 4<br/>(n=71,238)</b> | <b>Quintile 5<br/>(m=71,371)</b> | <b>p</b> |
|--------------------------------------|----------------------------------|----------------------------------|----------------------------------|----------------------------------|----------------------------------|----------|
| <b>Demographics</b>                  |                                  |                                  |                                  |                                  |                                  |          |
| Age - mean (SD)                      | 56.69 (8.28)                     | 56.7 (8.20)                      | 56.84 (8.04)                     | 56.93 (7.91)                     | 57.47 (7.51)                     | <0.0001  |
| Male sex - no. (%)                   | 55328 (77.32)                    | 42991 (59.95)                    | 32452 (45.5)                     | 22176 (31.13)                    | 12649 (17.72)                    | <0.0001  |
| <b>Biochemistry – mean (SD)</b>      |                                  |                                  |                                  |                                  |                                  |          |
| Total cholesterol (mmol/L)           | 5.12 (1.11) / 71542              | 5.57 (1.10) / 71696              | 5.77 (1.10) / 71313              | 5.92 (1.07) / 71228              | 6.21 (1.05) / 71355              | <0.0001  |
| Direct LDL-C (mmol/L)                | 3.32 (0.84) / 71433              | 3.60 (0.87) / 71610              | 3.67 (0.88) / 71215              | 3.66 (0.87) / 71144              | 3.62 (0.85) / 71232              | <0.0001  |
| Apolipoprotein B (g/L)               | 1.01 (0.24) / 70810              | 1.06 (0.24) / 71441              | 1.06 (0.24) / 71111              | 1.04 (0.24) / 71029              | 1 (0.23) / 71062                 | <0.0001  |
| Triglycerides (mmol/L)               | 2.50 (1.32) / 71502              | 1.99 (0.99) / 71658              | 1.69 (0.83) / 71267              | 1.44 (0.69) / 71183              | 1.17 (0.52) / 71315              | <0.0001  |
| HDL-C (mmol/L)                       | 0.99 (0.11) / 71561              | 1.22 (0.05) / 71709              | 1.40 (0.05) / 71323              | 1.62 (0.07) / 71238              | 2.03 (0.26) / 71371              | <0.0001  |
| Apolipoprotein A-I (g/L)             | 1.22 (0.12) / 71509              | 1.40 (0.10) / 71671              | 1.52 (0.10) / 71290              | 1.66 (0.12) / 71179              | 1.92 (0.20) / 69432              | <0.0001  |
| HbA1c (mmol/mol)                     | 37.85 (9.01) / 68332             | 36.27 (6.73) / 68517             | 35.62 (5.72) / 68146             | 35.20 (4.92) / 67935             | 34.87 (4.55) / 68142             | <0.0001  |
| C-reactive protein (mg/L)            | 3.44 (5.36) / 71296              | 2.87 (4.47) / 71582              | 2.55 (4.11) / 71194              | 2.25 (3.88) / 71110              | 1.91 (3.62) / 71234              | <0.0001  |
| <b>Medical History – no. (%) / n</b> |                                  |                                  |                                  |                                  |                                  |          |
| Diabetes mellitus                    | 8183 (11.43) / 71280             | 3832 (5.34) / 71520              | 2425 (3.4) / 71190               | 1617 (2.27) / 71130              | 1144 (1.60) / 71287              | <0.0001  |
| Hypertension                         | 26115 (36.56) / 71436            | 21484 (30.01) / 71601            | 18754 (26.33) / 71217            | 16093 (22.63) / 71110            | 14369 (20.16) / 71285            | <0.0001  |
| Angina                               | 4949 (6.93) / 71436              | 2666 (3.72) / 71601              | 1833 (2.57) / 71217              | 1176 (1.65) / 71110              | 825 (1.16) / 71285               | <0.0001  |
| Myocardial infarction                | 4041 (5.66) / 71436              | 1985 (2.77) / 71601              | 1161 (1.63) / 71217              | 748 (1.05) / 71110               | 448 (0.63) / 71285               | <0.0001  |
| Stroke                               | 1823 (2.55) / 71436              | 1223 (1.71) / 71601              | 942 (1.32) / 71217               | 841 (1.18) / 71110               | 663 (0.93) / 71285               | <0.0001  |
| BMI – mean (SD) / n                  | 29.79 (4.91) / 71249             | 28.49 (4.71) / 71470             | 27.48 (4.51) / 71131             | 26.39 (4.26) / 71050             | 24.97 (3.80) / 71185             | <0.0001  |
| <b>Medications – no. (%) / n</b>     |                                  |                                  |                                  |                                  |                                  |          |
| Lipid-lowering medication            | 4045 (25.10) / 16113             | 5165 (18.06) / 28600             | 5273 (13.62) / 38718             | 5151 (10.54) / 48880             | 4727 (8.07) / 58550              | <0.0001  |
| Antihypertensives                    | 4931 (30.60) / 16113             | 6720 (23.50) / 28600             | 7324 (18.92) / 38718             | 7404 (15.15) / 48880             | 7327 (12.51) / 58550             | <0.0001  |
| Insulin                              | 357 (2.22) / 16113               | 273 (0.95) / 28600               | 207 (0.53) / 38718               | 238 (0.49) / 48880               | 352 (0.60) / 58550               | <0.0001  |
| Exogenous hormones                   | 1822 (11.31) / 16113             | 2756 (9.64) / 28600              | 3595 (9.29) / 38718              | 4668 (9.55) / 48880              | 5948 (10.16) / 58550             | <0.0001  |

**Supplemental Table VII. Baseline characteristics of UK Biobank participants with British Caucasian genetic ancestry stratified by quintiles of measured levels of LDL-C. Body mass index (BMI), hemoglobin A1c (HbA1c), high-density lipoprotein cholesterol (HDL-C), low-density lipoprotein cholesterol (LDL-C).**

| Characteristic                       | Quintile 1<br>(n=77,977) | Quintile 2<br>(n=78,009) | Quintile 3<br>(n=77,898) | Quintile 4<br>(n=77,791) | Quintile 5<br>(n=77,889) | p       |
|--------------------------------------|--------------------------|--------------------------|--------------------------|--------------------------|--------------------------|---------|
| <b>Demographics</b>                  |                          |                          |                          |                          |                          |         |
| Age - mean (SD)                      | 57.18 (8.65)             | 56.04 (8.31)             | 56.49 (7.95)             | 57.06 (7.62)             | 57.77 (7.3)              | <0.0001 |
| Male sex - no. (%)                   | 41162 (52.79)            | 36025 (46.18)            | 35547 (45.63)            | 35029 (45.03)            | 31274 (40.15)            | <0.0001 |
| <b>Biochemistry – mean (SD)</b>      |                          |                          |                          |                          |                          |         |
| Total cholesterol (mmol/L)           | 4.25 (0.56) / 77944      | 5.12 (0.39) / 77989      | 5.67 (0.38) / 77885      | 6.25 (0.39) / 77768      | 7.29 (0.71) / 77874      | <0.0001 |
| Direct LDL-C (mmol/L)                | 2.41 (0.33) / 77977      | 3.08 (0.14) / 78009      | 3.53 (0.13) / 77898      | 4.01 (0.15) / 77791      | 4.84 (0.49) / 77889      | <0.0001 |
| Apolipoprotein B (g/L)               | 0.73 (0.10) / 77099      | 0.90 (0.07) / 77772      | 1.02 (0.07) / 77684      | 1.15 (0.08) / 77618      | 1.37 (0.15) / 77460      | <0.0001 |
| Triglycerides (mmol/L)               | 1.50 (0.96) / 77922      | 1.59 (0.98) / 77963      | 1.70 (0.99) / 77842      | 1.86 (1.01) / 77751      | 2.13 (1.06) / 77836      | <0.0001 |
| HDL-C (mmol/L)                       | 1.38 (0.4) / 71146       | 1.46 (0.39) / 71181      | 1.47 (0.38) / 71291      | 1.47 (0.37) / 71478      | 1.49 (0.35) / 71538      | <0.0001 |
| Apolipoprotein A-I (g/L)             | 1.49 (0.28) / 70763      | 1.55 (0.27) / 70748      | 1.55 (0.27) / 70857      | 1.55 (0.27) / 71066      | 1.56 (0.26) / 71153      | <0.0001 |
| HbA1c (mmol/mol)                     | 37.62 (9.27) / 74469     | 35.53 (6.45) / 74458     | 35.28 (5.27) / 74345     | 35.42 (5.02) / 74303     | 35.94 (5.05) / 74508     | <0.0001 |
| C-reactive protein (mg/L)            | 2.72 (5.18) / 77689      | 2.53 (4.55) / 77830      | 2.54 (4.34) / 77719      | 2.54 (3.90) / 77653      | 2.65 (3.70) / 77761      | <0.0001 |
| <b>Medical History – no. (%) / n</b> |                          |                          |                          |                          |                          |         |
| Diabetes mellitus                    | 11892 (15.25) / 77748    | 3466 (4.44) / 77827      | 1723 (2.21) / 77741      | 1019 (1.31) / 77640      | 675 (0.87) / 77750       | <0.0001 |
| Hypertension                         | 30528 (39.22) / 77841    | 21268 (27.30) / 77904    | 18636 (23.96) / 77774    | 17750 (22.85) / 77681    | 17171 (22.08) / 77757    | <0.0001 |
| Angina                               | 7391 (9.49) / 77841      | 2573 (3.30) / 77904      | 1161 (1.49) / 77774      | 741 (0.95) / 77681       | 604 (0.78) / 77757       | <0.0001 |
| Myocardial infarction                | 5759 (7.40) / 77841      | 1856 (2.38) / 77904      | 792 (1.02) / 77774       | 409 (0.53) / 77681       | 311 (0.40) / 77757       | <0.0001 |
| Stroke                               | 3262 (4.19) / 77841      | 1220 (1.57) / 77904      | 679 (0.87) / 77774       | 457 (0.59) / 77681       | 392 (0.50) / 77757       | <0.0001 |
| BMI – mean (SD) / n                  | 27.56 (5.27) / 77656     | 27.07 (4.88) / 77760     | 27.19 (4.64) / 77699     | 27.47 (4.55) / 77587     | 27.77 (4.32) / 77653     | <0.0001 |
| <b>Medications – no. (%) / n</b>     |                          |                          |                          |                          |                          |         |
| Lipid-lowering medication            | 13028 (35.52) / 36678    | 7033 (16.81) / 41832     | 3455 (8.19) / 42200      | 1809 (4.25) / 42568      | 1323 (2.85) / 46429      | <0.0001 |
| Antihypertensives                    | 10079 (27.48) / 36678    | 7427 (17.75) / 41832     | 6403 (15.17) / 42200     | 6370 (14.96) / 42568     | 6621 (14.26) / 46429     | <0.0001 |
| Insulin                              | 1032 (2.81) / 36678      | 283 (0.68) / 41832       | 137 (0.32) / 42200       | 63 (0.15) / 42568        | 58 (0.12) / 46429        | <0.0001 |
| Exogenous hormones                   | 4427 (12.07) / 36678     | 4805 (11.49) / 41832     | 4415 (10.46) / 42200     | 3808 (8.95) / 42568      | 3202 (6.9) / 46429       | <0.0001 |

**Supplemental Table VIII. Baseline characteristics of UK Biobank participants with British Caucasian genetic ancestry stratified by quintiles of measured levels of triglycerides. Body mass index (BMI), hemoglobin A1c (HbA1c), high-density lipoprotein cholesterol (HDL-C), low-density lipoprotein cholesterol (LDL-C).**

| Characteristic                       | Quintile 1<br>(n=78,149) | Quintile 2<br>(n=77,954) | Quintile 3<br>(n=77,987) | Quintile 4<br>(n=77,964) | Quintile 5<br>(n=77,917) | p       |
|--------------------------------------|--------------------------|--------------------------|--------------------------|--------------------------|--------------------------|---------|
| <b>Demographics</b>                  |                          |                          |                          |                          |                          |         |
| Age - mean (SD)                      | 54.72 (8.32)             | 56.79 (8.02)             | 57.65 (7.81)             | 57.98 (7.68)             | 57.4 (7.74)              | <0.0001 |
| Male sex - no. (%)                   | 25470 (32.59)            | 30300 (38.87)            | 34855 (44.69)            | 40108 (51.44)            | 48486 (62.23)            | <0.0001 |
| <b>Biochemistry – mean (SD)</b>      |                          |                          |                          |                          |                          |         |
| Total cholesterol (mmol/L)           | 5.32 (1.00) / 78118      | 5.58 (1.06) / 77933      | 5.71 (1.1) / 77968       | 5.86 (1.16) / 77946      | 6.10 (1.23) / 77902      | <0.0001 |
| Direct LDL-C (mmol/L)                | 3.17 (0.73) / 78006      | 3.46 (0.79) / 77810      | 3.61 (0.84) / 77871      | 3.75 (0.89) / 77841      | 3.86 (0.92) / 77786      | <0.0001 |
| Apolipoprotein B (g/L)               | 0.91 (0.19) / 77726      | 0.99 (0.21) / 77794      | 1.04 (0.22) / 77844      | 1.09 (0.24) / 77827      | 1.14 (0.26) / 76862      | <0.0001 |
| Triglycerides (mmol/L)               | 0.78 (0.13) / 78149      | 1.14 (0.1) / 77954       | 1.50 (0.12) / 77987      | 2.01 (0.19) / 77964      | 3.36 (1.06) / 77917      | <0.0001 |
| HDL-C (mmol/L)                       | 1.71 (0.40) / 71478      | 1.57 (0.36) / 71419      | 1.45 (0.33) / 71329      | 1.34 (0.30) / 71380      | 1.19 (0.27) / 71319      | <0.0001 |
| Apolipoprotein A-I (g/L)             | 1.65 (0.28) / 70681      | 1.60 (0.27) / 70912      | 1.55 (0.26) / 71026      | 1.50 (0.25) / 71141      | 1.42 (0.23) / 71141      | <0.0001 |
| HbA1c (mmol/mol)                     | 34.49 (5.19) / 74629     | 35.20 (5.53) / 74373     | 35.81 (5.72) / 74476     | 36.61 (6.66) / 74411     | 37.67 (8.31) / 74590     | <0.0001 |
| C-reactive protein (mg/L)            | 1.93 (4.36) / 77937      | 2.37 (4.42) / 77763      | 2.69 (4.52) / 77832      | 2.94 (4.42) / 77839      | 3.06 (4.01) / 77689      | <0.0001 |
| <b>Medical History – no. (%) / n</b> |                          |                          |                          |                          |                          |         |
| Diabetes mellitus                    | 2227 (2.85) / 78063      | 2586 (3.32) / 77821      | 3407 (4.37) / 77823      | 4583 (5.88) / 77762      | 5988 (7.69) / 77644      | <0.0001 |
| Hypertension                         | 13787 (17.66) / 78050    | 18277 (23.48) / 77832    | 21643 (27.80) / 77851    | 24551 (31.54) / 77847    | 27191 (34.96) / 77783    | <0.0001 |
| Angina                               | 1655 (2.12) / 78050      | 2147 (2.76) / 77832      | 2574 (3.31) / 77851      | 2880 (3.70) / 77847      | 3225 (4.15) / 77783      | <0.0001 |
| Myocardial infarction                | 1269 (1.63) / 78050      | 1603 (2.06) / 77832      | 1757 (2.26) / 77851      | 2149 (2.76) / 77847      | 2356 (3.03) / 77783      | <0.0001 |
| Stroke                               | 1089 (1.40) / 78050      | 1154 (1.48) / 77832      | 1129 (1.45) / 77851      | 1275 (1.64) / 77847      | 1367 (1.76) / 77783      | <0.0001 |
| BMI – mean (SD) / n                  | 24.95 (3.89) / 77933     | 26.43 (4.41) / 77744     | 27.56 (4.63) / 77751     | 28.6 (4.76) / 77696      | 29.52 (4.60) / 77638     | <0.0001 |
| <b>Medications – no. (%) / n</b>     |                          |                          |                          |                          |                          |         |
| Lipid-lowering medication            | 3959 (7.54) / 52496      | 4964 (10.45) / 47482     | 5660 (13.18) / 42940     | 6149 (16.31) / 37709     | 5942 (20.28) / 29303     | <0.0001 |
| Antihypertensives                    | 5100 (9.72) / 52496      | 6856 (14.44) / 47482     | 8130 (18.93) / 42940     | 8784 (23.29) / 37709     | 8062 (27.51) / 29303     | <0.0001 |
| Insulin                              | 492 (0.94) / 52496       | 237 (0.50) / 47482       | 237 (0.55) / 42940       | 281 (0.75) / 37709       | 329 (1.12) / 29303       | <0.0001 |
| Exogenous hormones                   | 5690 (10.84) / 52496     | 4825 (10.16) / 47482     | 4047 (9.42) / 42940      | 3498 (9.28) / 37709      | 2628 (8.97) / 29303      | <0.0001 |

**Supplemental Table IX. Baseline characteristics of UK Biobank participants with British Caucasian genetic ancestry**

**stratified by quintiles of triglyceride polygenic score.** Body mass index (BMI), hemoglobin A1c (HbA1c), high-density lipoprotein cholesterol (HDL-C), low-density lipoprotein cholesterol (LDL-C).

| <b>Characteristic</b>                | <b>Quintile 1<br/>(n=81,512)</b> | <b>Quintile 2<br/>(n=81,510)</b> | <b>Quintile 3<br/>(n=81,513)</b> | <b>Quintile 4<br/>(n=81,511)</b> | <b>Quintile 5<br/>(n=81,512)</b> | <b>p</b> |
|--------------------------------------|----------------------------------|----------------------------------|----------------------------------|----------------------------------|----------------------------------|----------|
| <b>Demographics</b>                  |                                  |                                  |                                  |                                  |                                  |          |
| Age - mean (SD)                      | 56.91 (8.00)                     | 56.92 (8.00)                     | 56.87 (8.02)                     | 56.94 (7.97)                     | 56.92 (8.00)                     | 0.66     |
| Male sex - no. (%)                   | 37413 (45.9)                     | 37510 (46.02)                    | 37477 (45.98)                    | 37485 (45.99)                    | 37329 (45.80)                    | 0.90     |
| <b>Biochemistry – mean (SD)</b>      |                                  |                                  |                                  |                                  |                                  |          |
| Total cholesterol (mmol/L)           | 5.59 (1.08) / 77695              | 5.68 (1.12) / 77748              | 5.72 (1.13) / 77781              | 5.76 (1.16) / 77675              | 5.83 (1.21) / 77701              | <0.0001  |
| Direct LDL-C (mmol/L)                | 3.46 (0.83) / 77551              | 3.54 (0.85) / 77617              | 3.58 (0.87) / 77662              | 3.61 (0.88) / 77541              | 3.67 (0.91) / 77517              | <0.0001  |
| Apolipoprotein B (g/L)               | 0.99 (0.22) / 77404              | 1.02 (0.23) / 77489              | 1.03 (0.24) / 77474              | 1.05 (0.24) / 77293              | 1.07 (0.25) / 77057              | <0.0001  |
| Triglycerides (mmol/L)               | 1.46 (0.78) / 77628              | 1.62 (0.88) / 77696              | 1.74 (0.97) / 77731              | 1.86 (1.06) / 77628              | 2.12 (1.25) / 77613              | <0.0001  |
| HDL-C (mmol/L)                       | 1.52 (0.40) / 70981              | 1.48 (0.39) / 71103              | 1.45 (0.38) / 71364              | 1.43 (0.37) / 71056              | 1.38 (0.36) / 71172              | <0.0001  |
| Apolipoprotein A-I (g/L)             | 1.56 (0.27) / 70503              | 1.55 (0.27) / 70667              | 1.54 (0.27) / 70990              | 1.53 (0.27) / 70673              | 1.52 (0.27) / 70877              | <0.0001  |
| HbA1c (mmol/mol)                     | 35.98 (6.41) / 77719             | 35.94 (6.33) / 77688             | 35.96 (6.70) / 77744             | 36.00 (6.48) / 77599             | 35.99 (6.56) / 77727             | 0.05     |
| C-reactive protein (mg/L)            | 2.55 (4.32) / 77549              | 2.58 (4.34) / 77603              | 2.59 (4.35) / 77632              | 2.63 (4.37) / 77511              | 2.64 (4.46) / 77467              | <0.0001  |
| <b>Medical History – no. (%) / n</b> |                                  |                                  |                                  |                                  |                                  |          |
| Diabetes mellitus                    | 3864 (4.74) / 81332              | 3712 (4.55) / 81325              | 3894 (4.78) / 81347              | 4056 (4.98) / 81335              | 4165 (5.11) / 81328              | <0.0001  |
| Hypertension                         | 21098 (25.92) / 81399            | 21446 (26.35) / 81374            | 21988 (27.02) / 81386            | 22552 (27.71) / 81380            | 23130 (28.42) / 81383            | <0.0001  |
| Angina                               | 2279 (2.80) / 81399              | 2486 (3.06) / 81374              | 2648 (3.25) / 81386              | 2719 (3.34) / 81380              | 2979 (3.66) / 81383              | <0.0001  |
| Myocardial infarction                | 1629 (2.00) / 81399              | 1790 (2.20) / 81374              | 1904 (2.34) / 81386              | 2015 (2.48) / 81380              | 2231 (2.74) / 81383              | <0.0001  |
| Stroke                               | 1264 (1.55) / 81399              | 1182 (1.45) / 81374              | 1265 (1.55) / 81386              | 1226 (1.51) / 81380              | 1349 (1.66) / 81383              | 0.02     |
| BMI – mean (SD) / n                  | 27.45 (4.80) / 81247             | 27.42 (4.74) / 81254             | 27.40 (4.77) / 81246             | 27.43 (4.75) / 81263             | 27.39 (4.72) / 81260             | 0.24     |
| <b>Medications – no. (%) / n</b>     |                                  |                                  |                                  |                                  |                                  |          |
| Lipid-lowering medication            | 4464 (10.17) / 43892             | 4855 (11.09) / 43767             | 5509 (12.57) / 43814             | 6055 (13.81) / 43837             | 7057 (16.05) / 43976             | <0.0001  |
| Antihypertensives                    | 7237 (16.49) / 43892             | 7386 (16.88) / 43767             | 7669 (17.5) / 43814              | 7990 (18.23) / 43837             | 8317 (18.91) / 43976             | <0.0001  |
| Insulin                              | 355 (0.81) / 43892               | 325 (0.74) / 43767               | 306 (0.70) / 43814               | 338 (0.77) / 43837               | 352 (0.80) / 43976               | 0.32     |
| Exogenous hormones                   | 4252 (9.69) / 43892              | 4369 (9.98) / 43767              | 4303 (9.82) / 43814              | 4320 (9.85) / 43837              | 4382 (9.96) / 43976              | 0.59     |



## SUPPLEMENTAL FIGURES

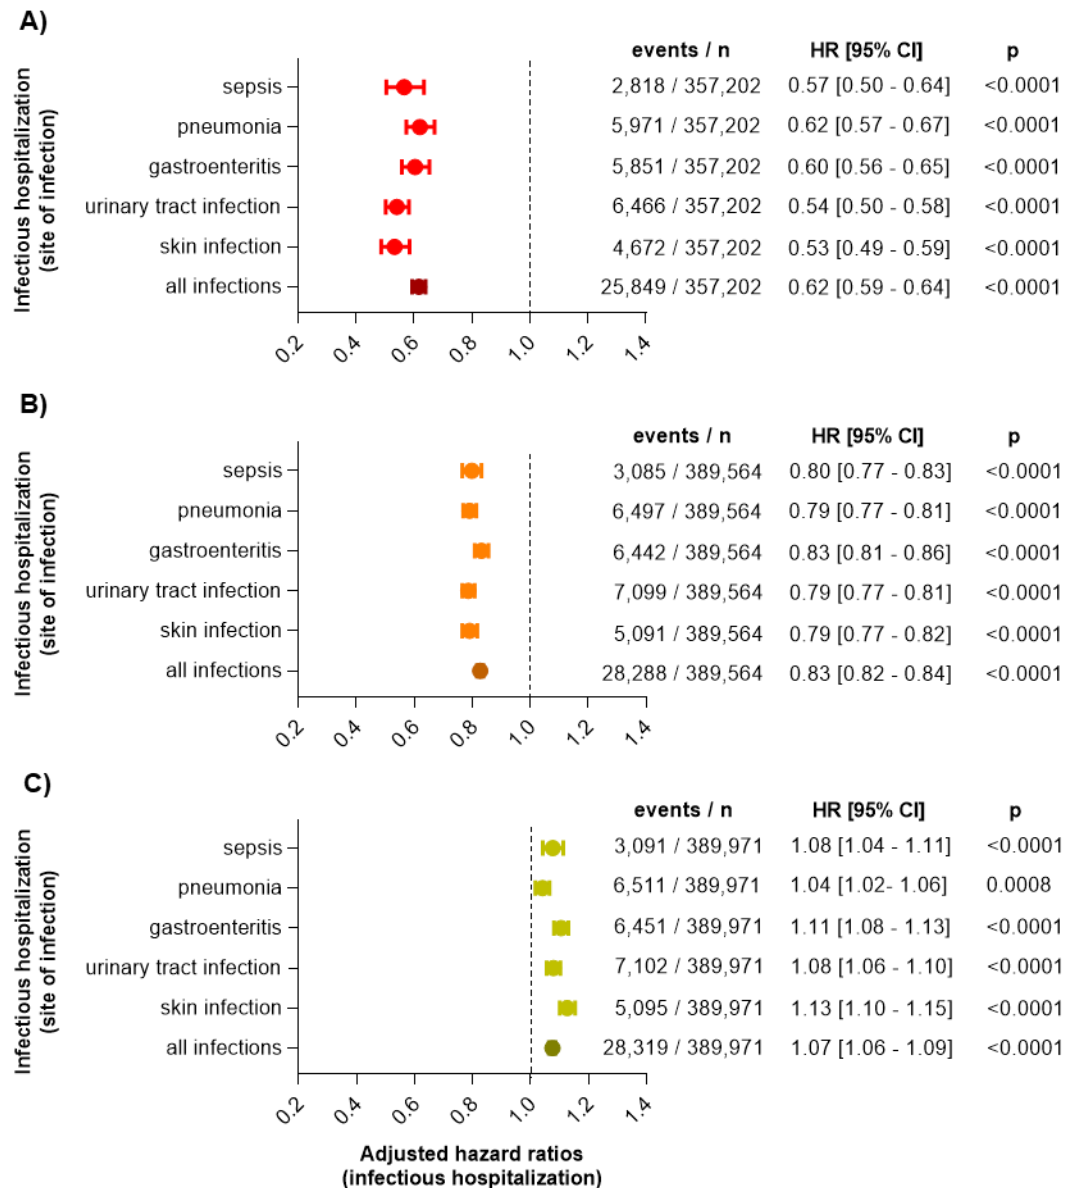

**Supplemental Figure I. Elevated levels of HDL-C and LDL-C associate with reduced risk of hospitalization for infectious disease, while elevated levels of triglycerides associate with increased risk of hospitalization for infectious disease.** Cox proportional-hazards models and the associated hazard ratios (HR) with 95% confidence intervals (CI) are displayed for infectious hospitalization classified by site of infection versus continuous levels of (A) HDL-C, (B) LDL-C (direct measurement), and (C) triglycerides (displayed for a 1 mmol/L increase). All

models were adjusted for age, sex, genotyping array, and first 4 principal components of genetic ancestry.

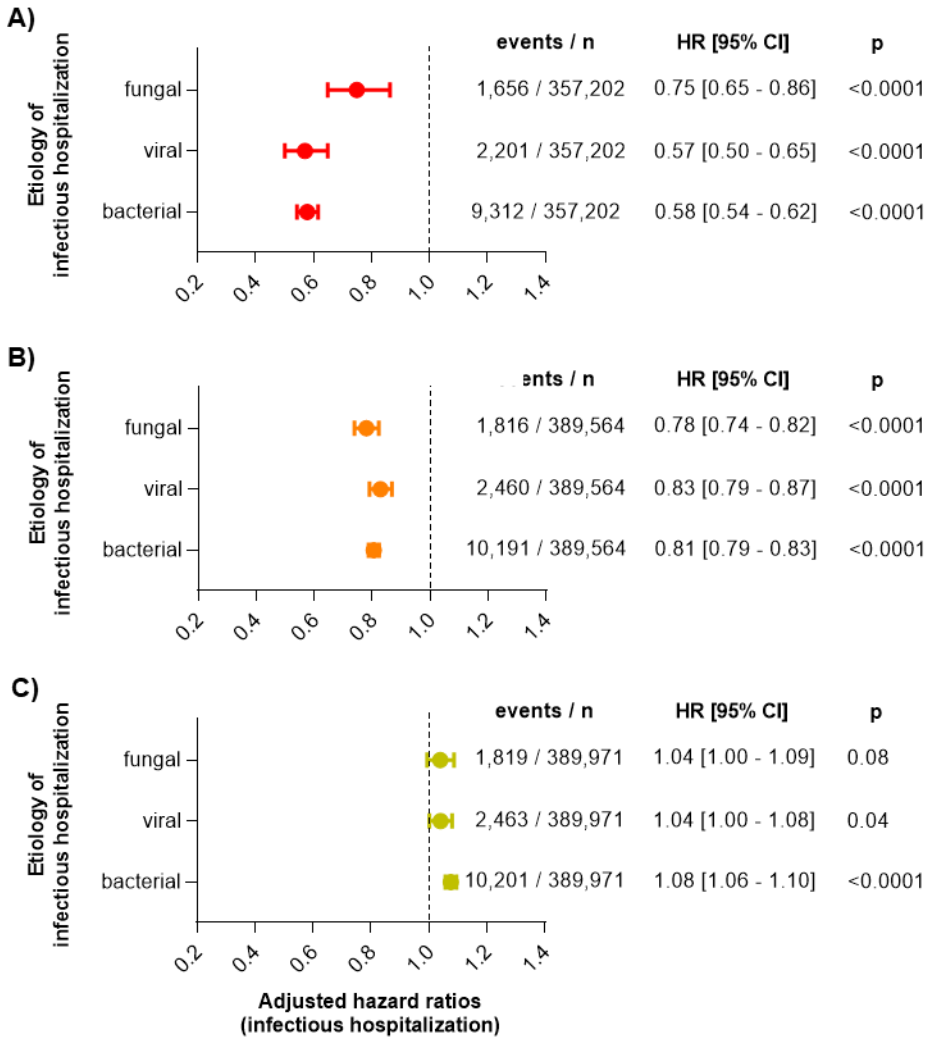

**Supplemental Figure II. Elevated levels of HDL-C and LDL-C associate with reduced risk of hospitalization for infectious disease that is independent of the of suspected the microorganism.** Cox proportional-hazards models and the associated hazard ratios (HR) with 95% confidence intervals (CI) are displayed for the suspected causative microorganism of infectious hospitalization versus continuous levels of (A) HDL-C, (B) LDL-C (direct measurement), and (C) triglycerides (displayed for a 1 mmol/L increase). All models were adjusted for age, sex, genotyping array, and first 4 principal components of genetic ancestry.

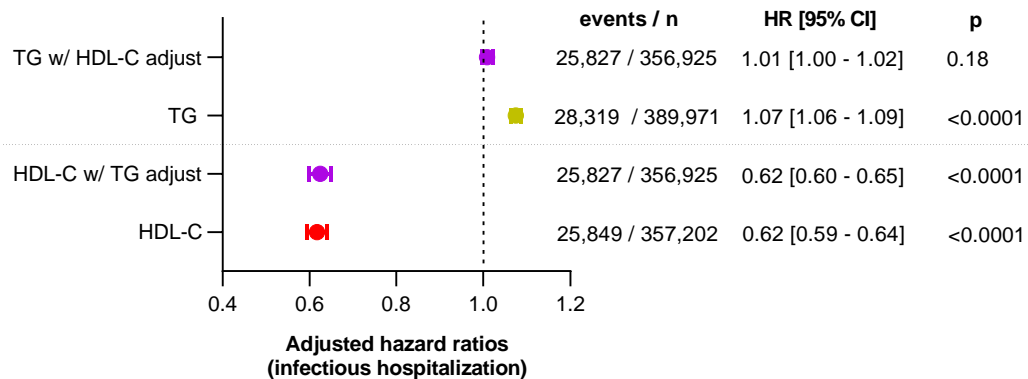

**Supplemental Figure III. The increased risk of any infectious hospitalizations observationally associated with higher levels of triglycerides are related to low levels of HDL-C in these individuals.** Cox proportional-hazards models and the associated hazard ratios (HR) with 95% confidence intervals (CI) are displayed for any infectious disease hospitalizations versus continuous levels of HDL-C and triglycerides (TG) (per 1 mmol/L increase). Hazards ratios are displayed with and without adjustments for levels of HDL-C or TG. All models were adjusted for age, genotyping array, and first 4 principal components of genetic ancestry.

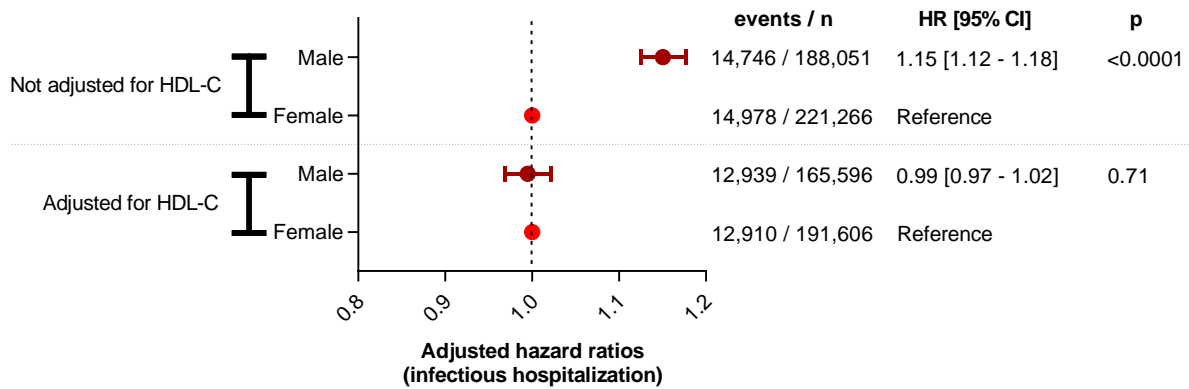

**Supplemental Figure IV. The reduced risk of any infectious hospitalizations among women is associated with HDL-C levels.** Cox proportional-hazards models and the associated hazard ratios (HR) with 95% confidence intervals (CI) are displayed for any infectious disease hospitalization versus sex. Hazards ratios are displayed with and without adjustments for baseline levels of HDL-C. All models were adjusted for age, genotyping array, and first 4 principal components of genetic ancestry.

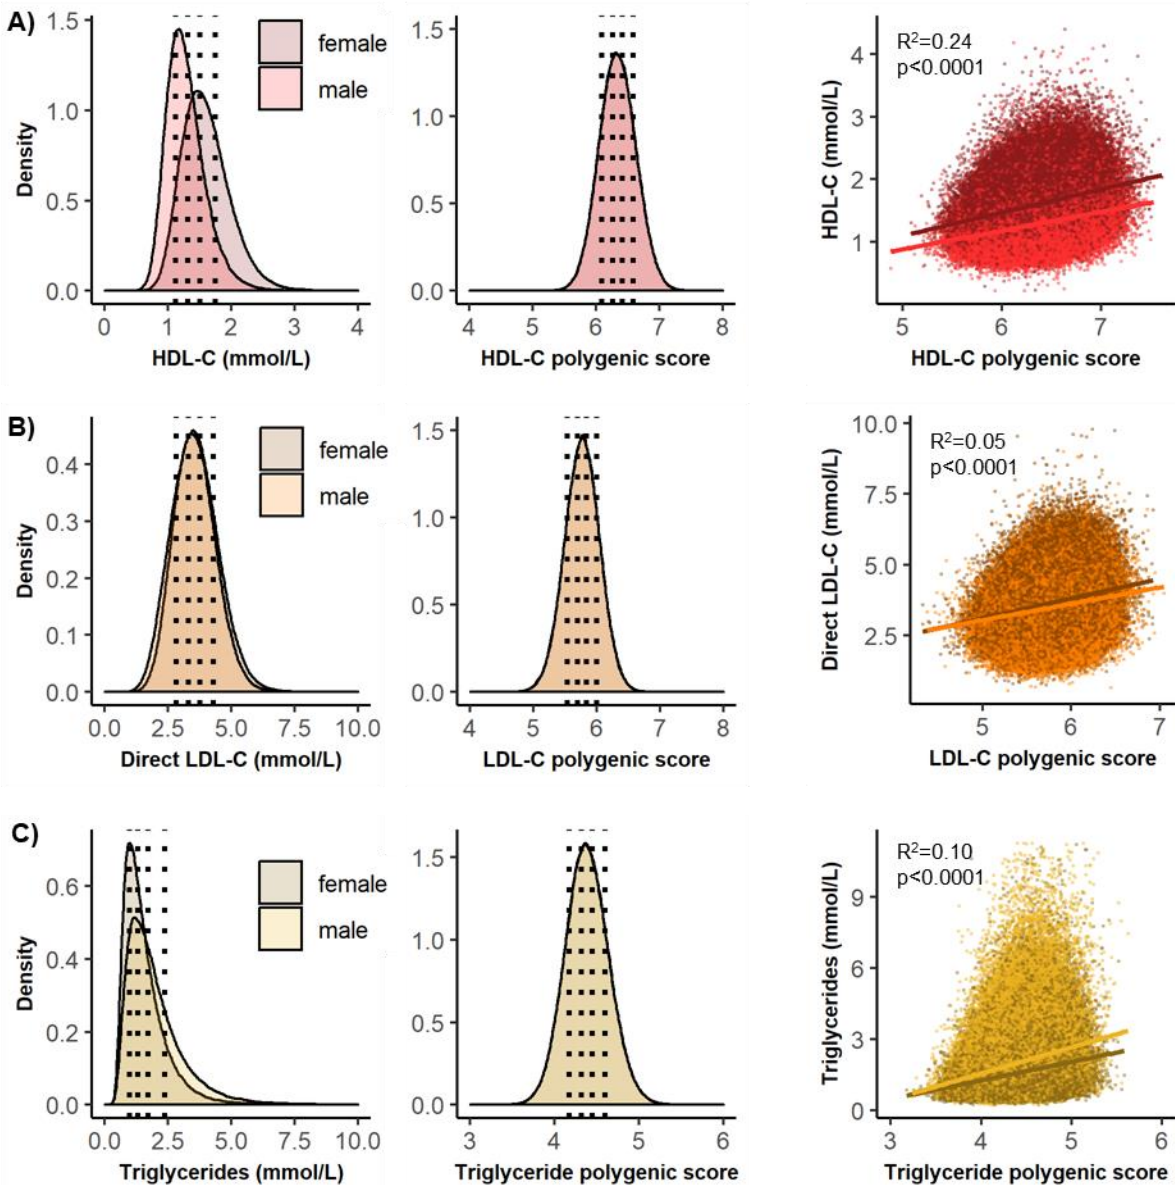

**Supplemental Figure V. Lipid polygenic scores are positively associated with lipid levels.**

Density plots depict the distribution of lipid levels and polygenic scores stratified by sex and the linear relationship between measured lipid levels versus polygenic score (standardized effect sizes in standard deviation units) for (A) HDL-C, (B) LDL-C (direct measurement), and (C) triglycerides. Dashed vertical lines represent the division of quintiles for the study population. The linear relationship between Solid colored lines depict the linear regression line of best fit segregated by sex.

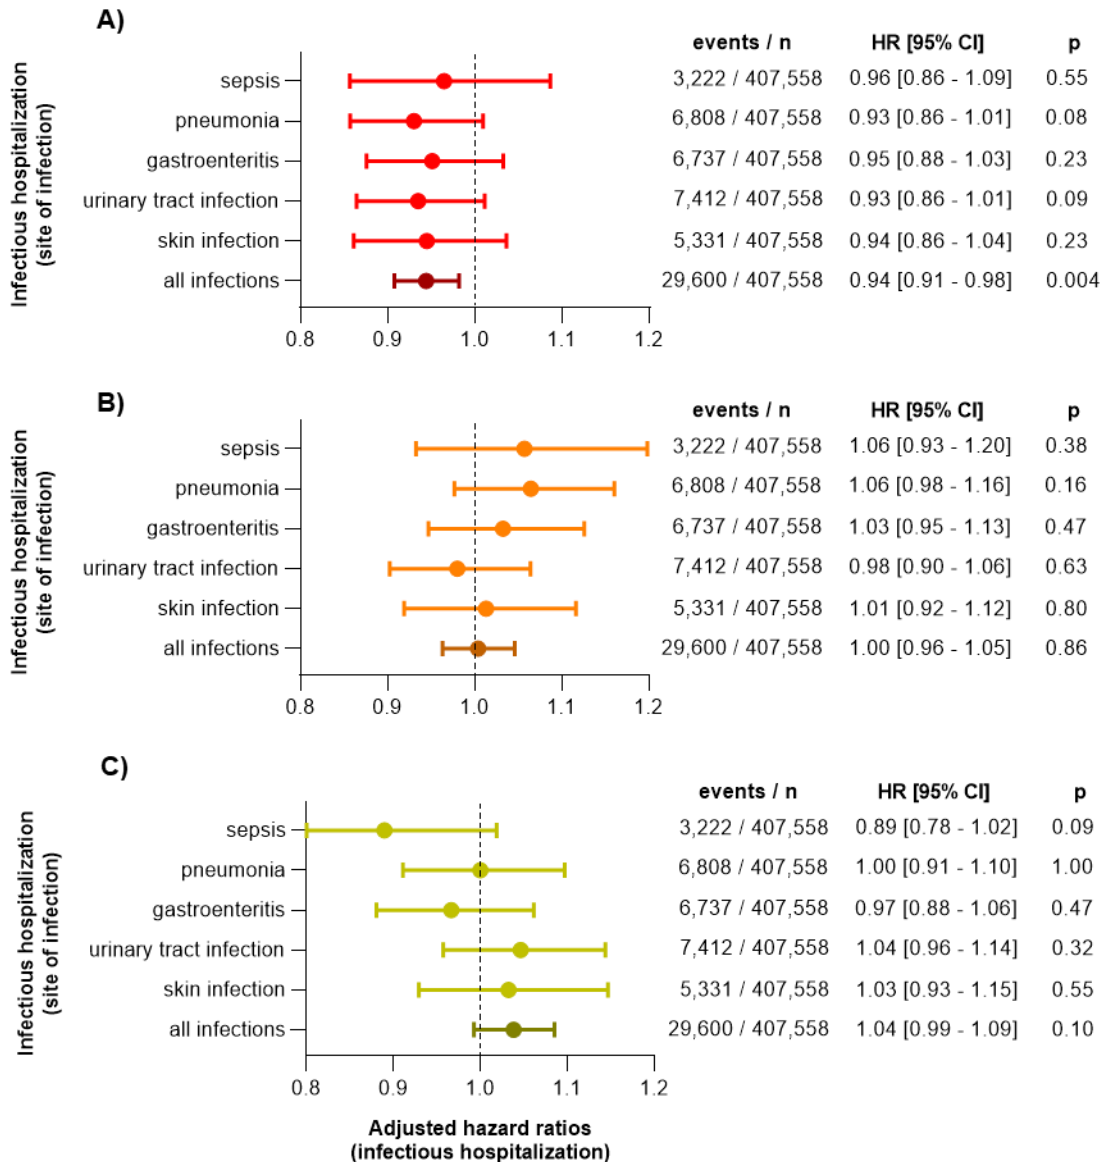

**Supplemental Figure VI. Only elevated levels of HDL-C polygenic score trend toward reduced risk of hospitalization for infectious disease, which appears to be independent of site infection.** Cox proportional-hazards models and the associated hazard ratios (HR) with 95% confidence intervals (CI) are displayed for any infectious hospitalization classified by site of infection versus continuous polygenic score (per standard deviation unit) for (A) HDL-C, (B) LDL-C, and (C) triglycerides. All models were adjusted for age, sex, genotyping array, and first 4 principal components of genetic ancestry.

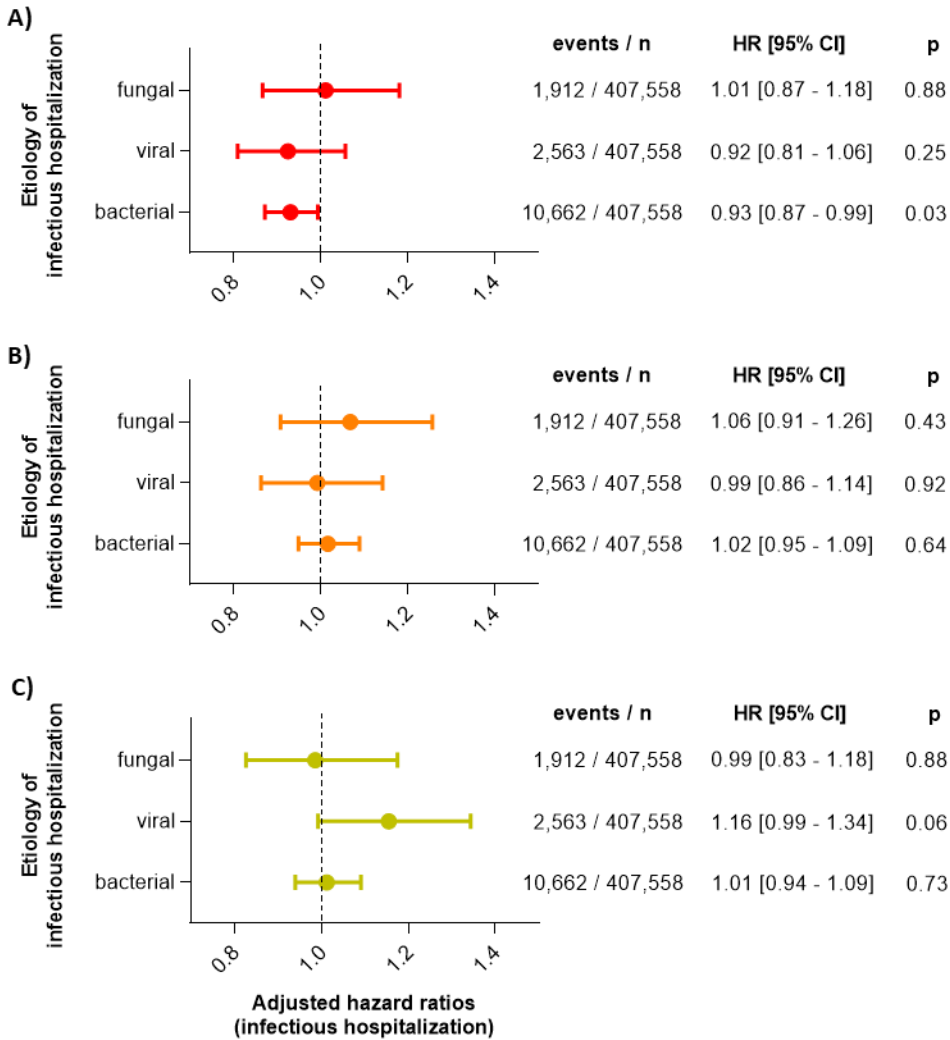

**Supplemental Figure VII. Influence of lipid polygenic scores on hospitalization for infection stratified by suspected etiology of infection.** Cox proportional-hazards models and the associated hazard ratios (HR) with 95% confidence intervals (CI) are displayed for the suspected causative microorganism of infectious hospitalization versus continuous polygenic scores (per a standard deviation unit) for (A) HDL-C, (B) LDL-C (direct measurement), and (C) triglyceride. All models were adjusted for age, sex, genotyping array, and first 4 principal components of genetic ancestry.



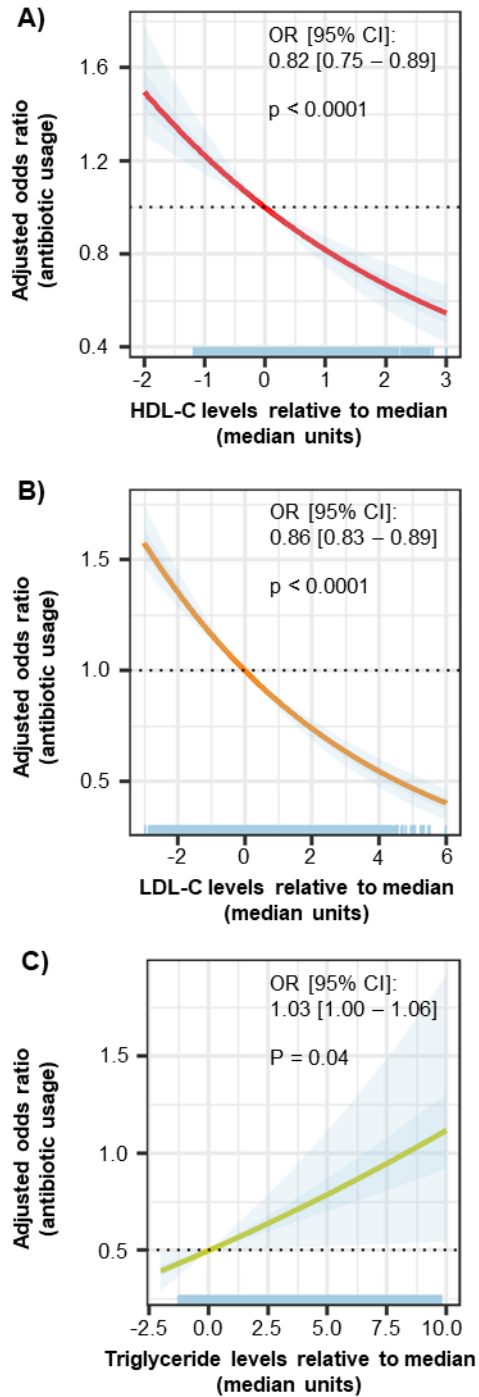

**Supplemental Figure VIII. Elevated levels of HDL-C and LDL-C associate with reduced odds of antibiotic usage, while elevated levels of triglycerides associate with increased odds of antibiotic usage.** Odds ratios (OR) are displayed with the 95% confidence intervals (CI; light blue) and standard error (dark blue shading) for antibiotic usage at the time of

recruitment versus units from the median value of measured levels of (A) HDL-C, (B) LDL-C (direct measurement), and (C) triglycerides. Odds ratios were determined by logistic regression adjusted for age, sex, genotyping array, and first 4 principal components of genetic ancestry.

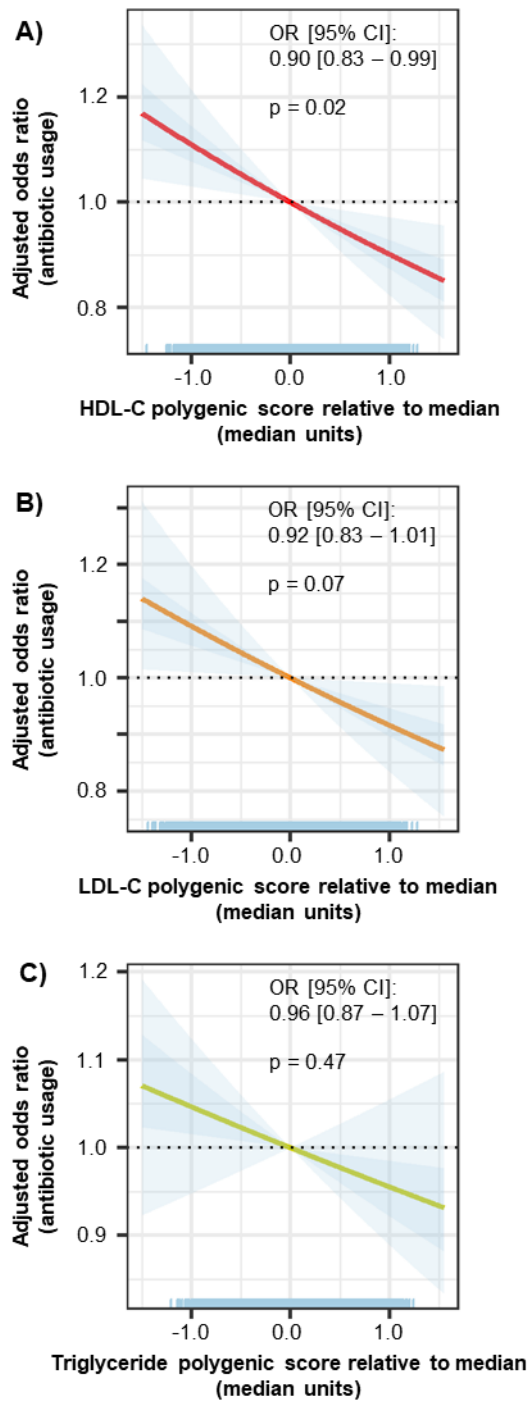

**Supplemental Figure IX. Only elevated levels of HDL-C are significantly and inversely associated with odds of antibiotic usage.** Odds ratios (OR) are displayed with the 95% confidence intervals (CI; light blue) and standard error (dark blue shading) for antibiotic usage at

the time of recruitment versus units from the median value of polygenic scores for (A) HDL-C, (B) LDL-C, and (C) triglycerides. Odds ratios were determined by logistic regression adjusted for age, sex, genotyping array, and first 4 principal components of genetic ancestry.

## **SUPPLEMENTAL REFERENCES**

1. Lu X, Peloso GM, Liu DJ, et al. Exome chip meta-analysis identifies novel loci and East Asian-specific coding variants that contribute to lipid levels and coronary artery disease. *Nat Genet.* 2017;49:1722-1730.
